# Supplementary material for: Fluorescence In Situ Hybridization and Optical Mapping to Correct Scaffold Arrangement in the Tomato Genome
Source: PubMed Central journal article supplement (PMC4132171; doi:10.1534/g3.114.011197), 2014-05-30
Supplement: supp_g3.114.011197_011197SI.pdf [file supp_g3.114.011197_011197SI.pdf]

## Fluorescence *in situ* hybridization and optical mapping to correct scaffold arrangement in the tomato genome

Lindsay A. Shearer,<sup>\*</sup> Lorinda K. Anderson,<sup>\*</sup> Hans de Jong,<sup>§</sup> Sandra Smit,<sup>†</sup> José Luis Goicoechea,<sup>‡</sup> Bruce A. Roe,<sup>\*\*</sup> Axin Hua,<sup>\*\*</sup> James J. Giovannoni,<sup>§§</sup> and Stephen M. Stack<sup>\*</sup>

<sup>\*</sup> Department of Biology, Colorado State University, Fort Collins, CO 80525, USA

<sup>§</sup> Laboratory of Genetics, Wageningen University and Research Centre (WUR), Droevendaalsesteeg 1, 6708 PB Wageningen, The Netherlands

<sup>†</sup> Laboratory of Bioinformatics, WUR, Droevendaalsesteeg1, 6708 PB Wageningen, The Netherlands

<sup>‡</sup> Arizona Genomics Institute, University of Arizona, Tucson, AZ 85721

<sup>\*\*</sup> Department of Chemistry and Biochemistry, Stephenson Research and Technology Center, University of Oklahoma, Norman, OK, USA 73019

<sup>§§</sup> Department of Plant Biology, Cornell University, Ithaca, NY 14853, US

Corresponding author:

Stephen Stack

Department of Biology

Colorado State University

1878 Campus Delivery

Fort Collins, CO 80523-1878

Phone: 970-491-6802

[Stephen.Stack@colostate.edu](mailto:Stephen.Stack@colostate.edu)

DOI: 10.1534/g3.114.011197

## File S1

### Materials and Methods

**Isolating BACs.** The following modifications were made in the standard protocol for plasmid isolation using an AquaPlasmid kit (MultiTarget Pharmaceuticals, Salt Lake City, Utah). Bacterial culture volume was increased from 2 ml to 4 ml. After removing supernatant from the bacterial pellet, bacteria were suspended in 100  $\mu$ L of deionized water containing 400  $\mu$ g/ml ribonuclease A instead of 80  $\mu$ l of deionized water. After addition of AquaLysis, instead of mixing by vortexing, the tubes were rocked gently for 5 minutes. 50  $\mu$ L of 3M sodium acetate was added to each tube and tubes were rocked gently for 5 minutes to mix. Then AquaPlasmid reagents were added and mixed gently by rocking for 5 minutes. Centrifugation was increased from 5 minutes to 20 minutes to pellet debris after the addition of AquaLysis.

### **Determining the amount of DNA per micrometer of SC (= linear DNA density) in kinetochores, euchromatin, and**

**heterochromatin.** The lengths of scaffolds that are wholly contained in a kinetochore, or in distal euchromatin, or in pericentric heterochromatin were measured as a percent of arm length between the fluorescent signal of a BAC at the head of the scaffold and the fluorescent signal of a BAC at the tail of the scaffold. These percent lengths were converted to micrometers based on the average pachytene SC set (see *Measuring positions of BACs on SCs* in Materials and Methods). Before linear density of DNA can be calculated, a correction must be made to take into account the fact that amount of DNA (scaffold size) between FISH foci is actually an overestimate because 1) a FISH focus is considered to be in the center of a BAC and 2) sometimes subterminal BACs rather than terminal BACs in scaffolds were used for FISH in cases where terminal BACs did not work for FISH. Therefore, there is less DNA between the FISH signals than in the scaffold because some scaffold DNA extends beyond the FISH signals into the adjacent gaps. As a correction, the scaffold DNA extending beyond the FISH signals was subtracted from the scaffold size to yield the amount of DNA between the FISH foci. For example, based on BAC-FISH, scaffold SL2.40sc04626 in the euchromatin of the long arm of SC 7 is measured to be 2.0  $\mu$ m long. This scaffold is known to be 3.39 Mb long (<http://solgenomics.net>). On the left side of the scaffold, the localized BAC SL\_EcoRI0032D11 is 150 kb long. Assuming the fluorescent signal is in the middle of the BAC, (150 kb  $\div$  2 =) 75 kb that extends beyond the FISH signal was subtracted from the scaffold size. Because this BAC starts 11 kb into the scaffold, another 11 kb was subtracted from the scaffold size. On the right side of the scaffold the localized BAC SL\_MboI0017L19 is 74 Mb long, so an additional (74 Mb  $\div$  2 =) 37 kb was subtracted from the scaffold size. Also, this BAC is not terminal, but starts 99 kb from the right end of the scaffold, so an additional 99 kb was subtracted from the scaffold size. Thus, the corrected amount of DNA between these two FISH signals is (3390 kb – 11 kb – 75 kb – 37 kb – 99 kb =) 3168 kb or  $\sim$ 3.2 Mb compared to the complete scaffold size of 3.39 Mb.

**Adjusting measured gap sizes.** Gap lengths were initially determined by measuring the distance between the fluorescent focus of a BAC at or near the end of one scaffold and the fluorescent focus of another BAC at or near the end of the adjacent scaffold. This measurement, expressed as a percent of the arm length, was repeated on ten or more SC spreads to obtain an average distance expressed as a percent of the arm length between the two BACs. This percent distance was converted to micrometers by multiplying the percent (decimal fraction) times the average length of this SC arm in micrometers that was determined by Sherman and Stack (1992). This distance in micrometers was converted to a quantity of DNA based on the linear (DNA) density of the chromatin type where the gap is located (Table S6). Gap sizes calculated this way are overestimates because 1) FISH foci are assumed to be in the center of a localized BAC and 2) subterminal BACs rather than terminal BACs in scaffolds often were used for FISH. Therefore, the measured gap sizes should be reduced by the amount of DNA estimated to extend from the FISH signals into the gap. For example, gap 9-10 on the long arm of SC 12, *i.e.*, the gap between scaffolds SL2.40sc05611 and SL2.40sc05380, was measured to be 0.12  $\mu\text{m}$  long in euchromatin and the amount of DNA in the gap is estimated to be (1.5 Mb/ $\mu\text{m}$  X 0.12  $\mu\text{m}$  =) 0.18 Mb or 180 kb. On the left side of the gap, the localized BAC SL\_EcoRI0024H05 is 106 kb long, and this BAC is the terminal (the last) BAC in the scaffold. Assuming that the fluorescent focus is in the middle of the BAC (106 kb  $\div$  2 =) 53 kb should be subtracted from the gap size. On the right side of the scaffold the localized BAC Le\_HBa0029L21 is 120 kb long, so an additional (120kb  $\div$  2=) 60 kb should be subtracted from the scaffold size. Also the BAC localized to the right is not the terminal BAC, but 53 kb from the end of the right scaffold, so this amount of DNA also should be subtracted from the gap size. Thus, the corrected gap size is (180 kb – 53 kb – 60 kb – 53 kb =) 14 kb.

## REFERENCE

Sherman, J. D. and S. M. Stack, 1992 Two-dimensional spreads of synaptonemal complexes from solanaceous plants. V. Tomato (*Lycopersicon esculentum*) karyotype and idiogram. *Genome* **35**: 354-359.

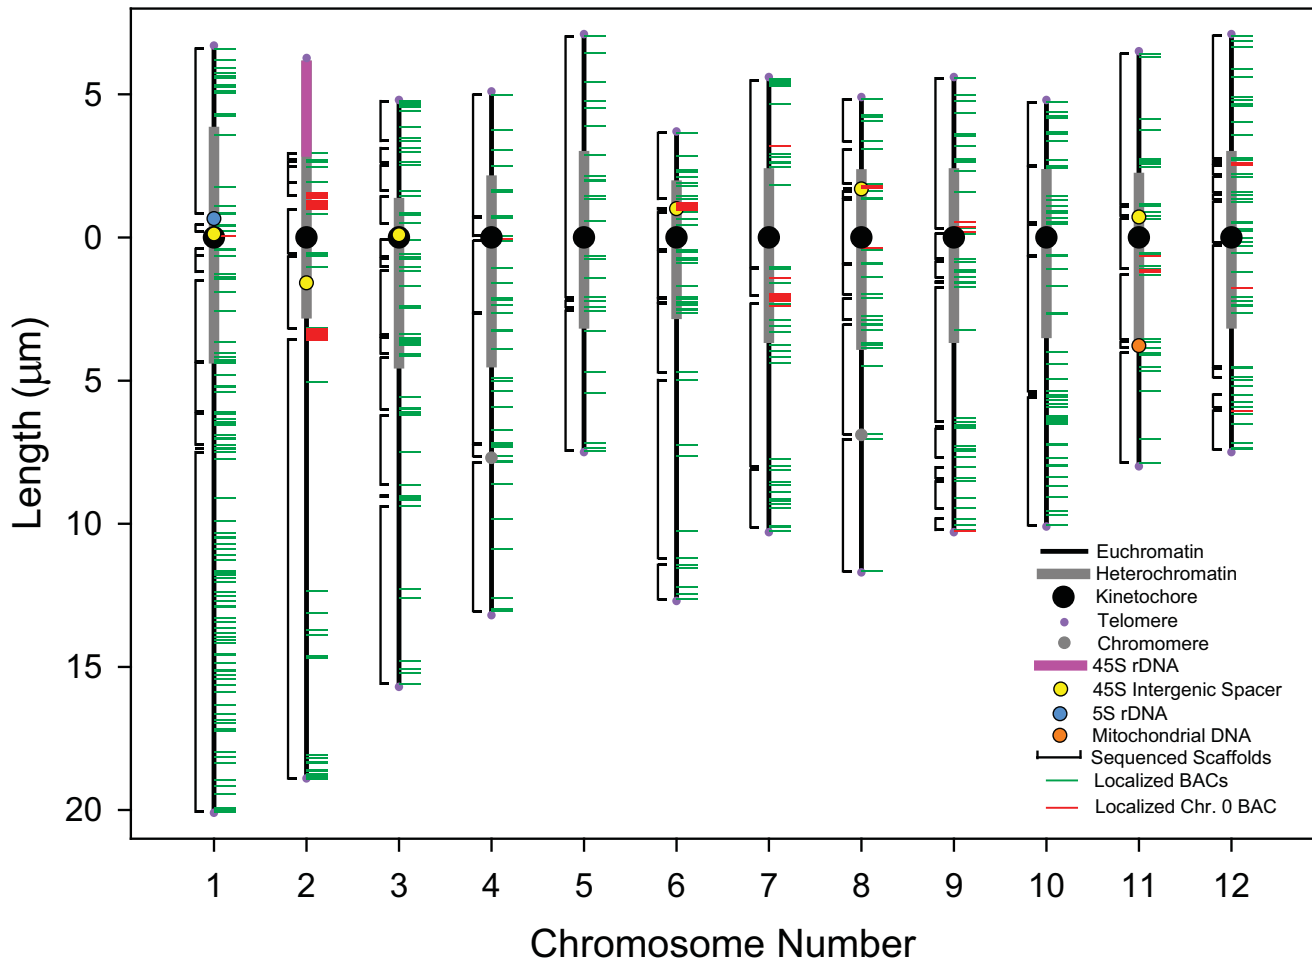

**Figure S1 Diagrammatic representation of BAC- and repeated sequence-FISH localizations relative to inferred scaffold positions on an idiogram of the twelve tomato SCs.** The twelve vertically oriented tomato SCs are numbered along the bottom. For each SC, black lines represent SC in distal euchromatin, thick grey lines represent SC in pericentric heterochromatin, and kinetochores (centromeres) are shown as black disks aligned at 0  $\mu\text{m}$  on the left scale. Grey dots in the euchromatin of the long arms of SCs 4 and 8 represent chromomeres. The short arm of chromosome 2 is entirely heterochromatic with the nucleolus organizer region (NOR) in the thick, pink, terminal segment marking the location of 45S rDNA. Other repeated sequences localized by FISH include sites of 45S rDNA intergenic spacer sequence (yellow spots on SCs 1, 2, 3, 6, 8 and 11), 5S rDNA (blue spot in the short arm of SC 1), a concentration of mitochondrial DNA (orange spot on SC 11), and canonical (TTTAGGG)<sub>n</sub> telomere repeats (purple knobs at the ends of all chromosomes). Short horizontal red and green lines extending to the right of each SC show BACs located by FISH. Red lines indicate the locations of 75 chromosome 0 BACs, while green lines indicate the locations of all other BACs. A total of 627 BACs have been localized, but there are 639 horizontal lines because twelve of the BACs hybridize to two locations (Figure S1). See [http://solgenomics.net/cview/map.pl?map\\_version\\_id=25](http://solgenomics.net/cview/map.pl?map_version_id=25) for identification of each BAC on the idiogram and the photographic data for every FISH localization. Brackets to the left of each SC mark chromosomal locations of scaffolds, while spaces between brackets represent gaps between scaffolds. Some scaffolds are so small that they appear only as lines in gaps, and some gaps are so small that no space is visible between adjacent brackets. Note that many chromosome 0 BACs (red horizontal lines) occur in gaps and that most of the locations of repeated sequences also correspond to gaps between sequenced scaffolds.

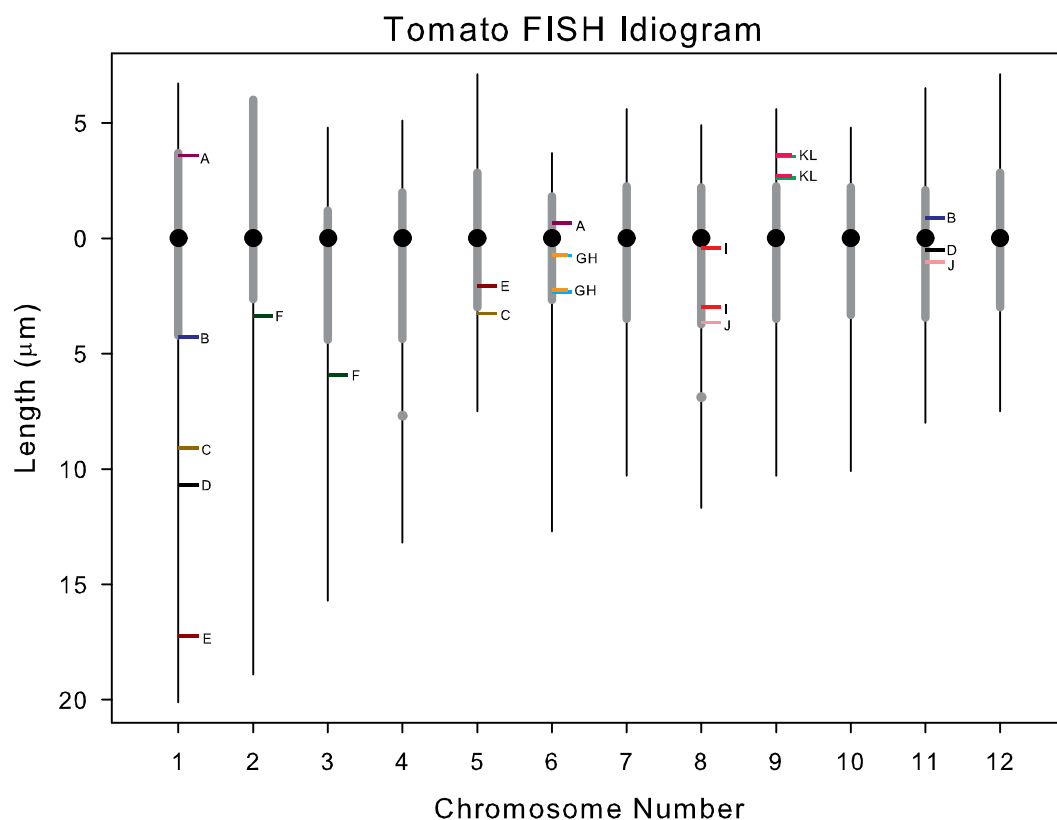

**Figure S2 Idiogram of tomato SCs with FISH localizations of BACs having two hybridization sites.** Each BAC is represented by two horizontal bars of the same color. Five BACs hybridize to two locations on the same SC. Two of these BACs are close to each other on SC 6 (G and H), two are close to each other on SC 9 (K and L), and one is on SC 8 (I). On SCs 6 and 9, the two BACs are so close together that they must carry DNA sequence from the same small duplicated chromosome segment. The other seven BACs each hybridize at one location on two different SCs, A on 1 and 6, B on 1 and 11, C on 1 and 5, D on 1 and 11, E on 1 and 5, F on 2 and 3, J on 8 and 11. These apparent duplications also could be due to chimeric BACs (one BAC with two random segments of tomato DNA), and/or cultures with two BACs, *i.e.*, contaminated cultures. Key to duplications: A is SL\_Mbol0081L19, B is LE\_HBa0023H04, C is LE\_HBa0006D05, D is LE\_HBa0305L18, E is LE\_HBa0033M02, F is LE\_HBa0101C24, G is LE\_HBa0031J01, H is SL\_Mbol0034N14, I is SL\_Mbol0012P13, J is SL\_EcoRI0027A06, K is LE\_HBa0300E15 and L is LE\_HBa0026P14.

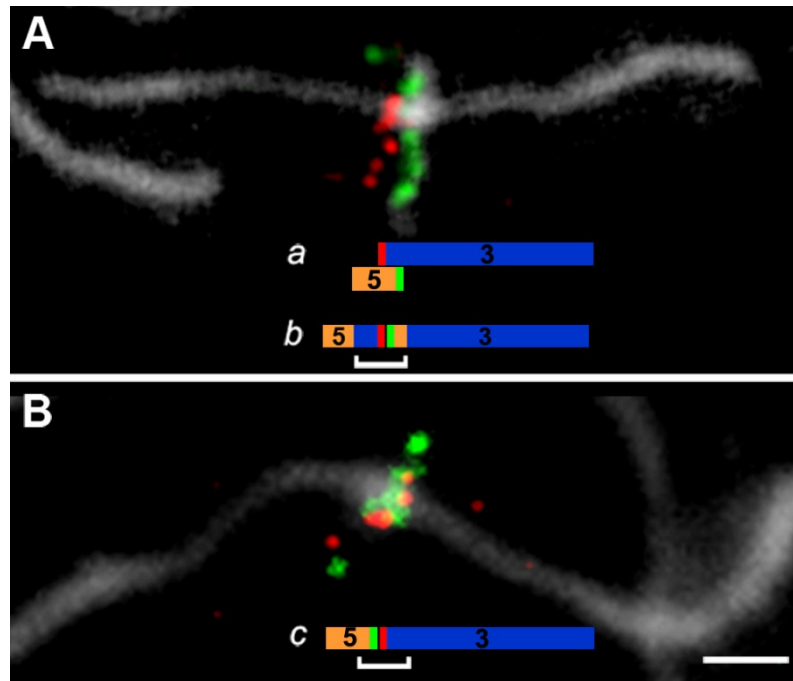

**Figure S3 FISH reveals a probable inversion around the centromere of chromosome 12, which distinguishes tomato var. *Cherry*, accession LA4444 and *S. lycopersicum*, var. Heinz 1706.** Digitally reversed phase images of SC 12 from (A) LA4444 and (B) Heinz 1706 with overlaid FISH signals for probes LE\_HBa0005D14 (red) that is part of scaffold SL2.40sc04057 (= scaffold 3) and SL\_EcoRI0012H19 (green) that is part of scaffold SL2.40sc04757 (= scaffold 5). Both SCs are oriented with the short arms to the left. Both probes hybridize near the centromere in both lines, but the order of the two probes relative to the short arm differs. Although not shown here, probes that mark the opposite ends of scaffolds 3 and 5 are located in the same relative positions in the long and short arms in both lines. Interpretive drawings (a-c) of scaffolds 3 (blue) and 5 (orange) with the red bar indicating the approximate position of probe LE\_HBa0005D14 on scaffold 3 and the green bar indicating the approximate position of probe SL\_EcoRI0012H19 on scaffold 5. (a) The positions of the probes on these two scaffolds indicate that the scaffolds overlap in LA4444. However, sequencing of Heinz 1706 did not reveal any such overlap. (b) Diagram of a probable inversion (shown by the bracket underneath) of a segment of chromosome 12 from LA4444 relative to Heinz 1706, which explains the observed probe locations. (c) The positions of the probes at the ends of scaffolds 5 and 3 on chromosome 12 of Heinz 1706 are consistent with two adjacent scaffolds. The bracket underneath indicates the location of the chromosome segment inverted between LA4444 and Heinz 1706. Bar equals 2  $\mu\text{m}$  for A and B. The drawings (a-c) are not to scale except the lengths of the two scaffolds are correct relative to each other.

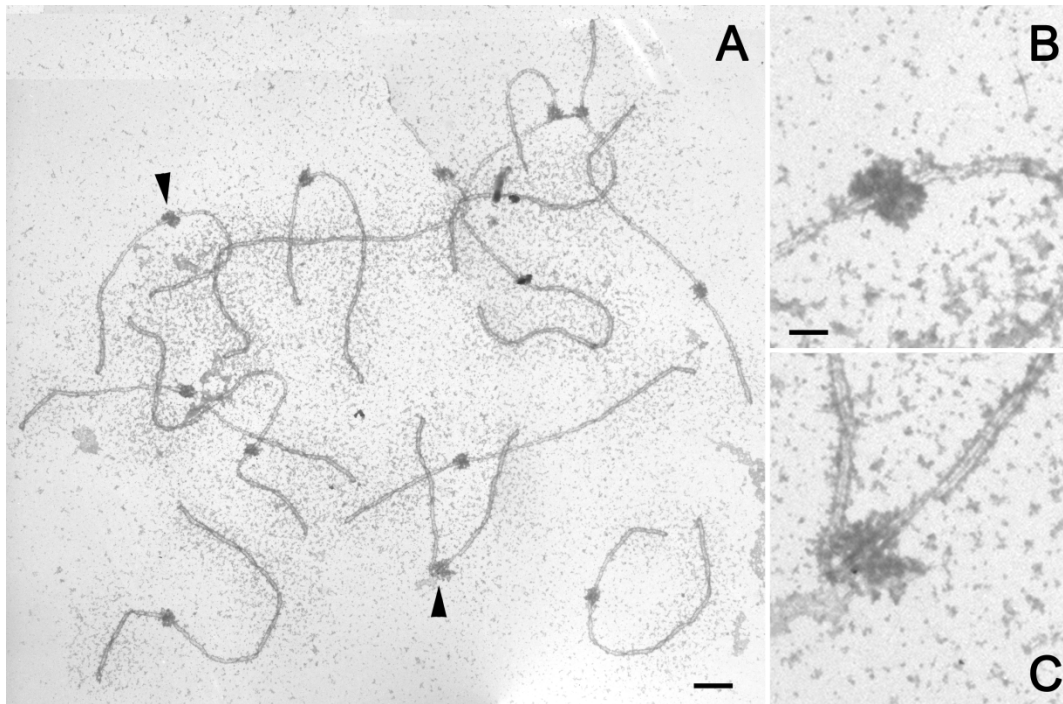

**Figure S4** Electron micrographs of phosphotungstic acid (PTA)-stained SCs from a Heinz 1706 X Cherry LA4444 tomato hybrid. **A.** Complete SC spread showing no synaptic irregularities that would indicate structural heterozygosities between the two lines. Chromosomes 5 and 12 (indicated by arrowheads at kinetochores) are structurally indistinguishable. **B.** and **C.** Higher magnification views of pericentric regions of SCs 5 and 12 from (A). Both chromosomes show straight synapsis through the kinetochore, even though the hybrid is probably heterozygous for an inversion involving the kinetochore of chromosome 12. SC spreading and PTA staining was performed as described by Stack and Anderson (2009). Bar in A = 2  $\mu\text{m}$ , bar in B (and C) = 0.5  $\mu\text{m}$

**Table S1 Master Scaffold List of all BACs in tomato genome sequence.**

Available for download as an Excel file at <http://www.g3journal.org/lookup/suppl/doi:10.1534/g3.114.011197/-/DC1>



**Table S2 Tomato SC karyotype<sup>1</sup>**

| <b>Chromosome number</b> | <b>% of set</b> | <b>Chromosome length (μm)</b> | <b>Arm ratio</b> | <b>Short arm length (μm)</b> | <b>Long arm length (μm)</b> |
|--------------------------|-----------------|-------------------------------|------------------|------------------------------|-----------------------------|
| 1                        | 13.1            | 26.8                          | 3.00             | 6.7                          | 20.1                        |
| 2                        | 8.5             | 24.9                          | 3.15             | 6.0                          | 18.9                        |
| 3                        | 9.8             | 20.5                          | 3.27             | 4.8                          | 15.7                        |
| 4                        | 8.7             | 18.3                          | 2.59             | 5.1                          | 13.2                        |
| 5                        | 7.2             | 14.6                          | 1.06             | 7.1                          | 7.5                         |
| 6                        | 7.9             | 16.4                          | 3.43             | 3.7                          | 12.7                        |
| 7                        | 7.8             | 15.9                          | 1.80             | 5.6                          | 10.3                        |
| 8                        | 7.9             | 16.6                          | 2.39             | 4.9                          | 11.7                        |
| 9                        | 7.8             | 15.9                          | 1.83             | 5.6                          | 10.3                        |
| 10                       | 7.2             | 14.9                          | 2.10             | 4.8                          | 10.1                        |
| 11                       | 6.9             | 14.5                          | 1.23             | 6.5                          | 8.0                         |
| 12                       | 7.2             | 14.6                          | 1.06             | 7.1                          | 7.5                         |
| <b>Total</b>             | <b>100.0</b>    | <b>213.9</b>                  |                  | <b>67.9</b>                  | <b>146.0</b>                |

<sup>1</sup>Modified from Sherman and Stack (1992) and Peterson et al. (1995)

**Table S3 All BACs and repeated sequences located by FISH on tomato SCs. Unless otherwise noted, all BACs are from the HindIII BAC library.**

| Chromosome arm | BAC            | Position % | Position um (SC) | Scaffold | Legend Key                                                        |
|----------------|----------------|------------|------------------|----------|-------------------------------------------------------------------|
|                | Telomere       | 100.0%     | 0.0              |          | <b>S = short arm; L = long arm</b>                                |
| 1S             | SL_s0090M22    | 98.5%      | 0.1              | S1       | Telomere                                                          |
| 1S             | 165H20         | 92.6%      | 0.5              |          | Eu/Het border using RNs to adjust estimate based on SC appearance |
| 1S             | 088A08         | 88.5%      | 0.8              |          | Centromere                                                        |
| 1S             | 130I12         | 85.7%      | 1.0              |          | Less than 1 micron from a telomere                                |
| 1S             | 069E17         | 84.1%      | 1.1              |          | or eu/het border                                                  |
| 1S             | 240P19         | 83.0%      | 1.1              |          | Less than 1 micron from a centromere                              |
| 1S             | 262O22         | 79.7%      | 1.4              |          | End of a scaffold                                                 |
| 1S             | 305J13         | 78.3%      | 1.5              |          | BAC with 2 positions                                              |
| 1S             | 291L11         | 76.4%      | 1.6              |          | Repeated sequences                                                |
| 1S             | 263P17         | 75.6%      | 1.6              |          | IGS = inter-genic                                                 |
| 1S             | 032H01         | 64.3%      | 2.4              |          | spacer repeat from rDNA                                           |
| 1S             | 003D15         | 63.5%      | 2.4              |          |                                                                   |
| 1S             | Eu/Het border  | 55.0%      | 3.0              |          |                                                                   |
| 1S             | SL_Mbol0012I20 | 53.5%      | 3.1              |          |                                                                   |

|    |                       |       |      |    |
|----|-----------------------|-------|------|----|
| 1S | SL_Mbol0081L19        | 53.2% | 3.1  |    |
| 1S | 177F14                | 26.4% | 4.9  |    |
| 1S | 107C12                | 16.5% | 5.6  |    |
| 1S | SL_Mbol0034D03        | 12.5% | 5.9  | S1 |
| 1S | 027P13                | 12.4% | 5.9  |    |
| 1S | 5S rDNA               | 9.8%  | 6.0  |    |
| 1S | SL_s0053P14           | 6.6%  | 6.3  | S3 |
| 1S | 081I16                | 5.8%  | 6.3  |    |
| 1S | SL_s0083L21           | 3.2%  | 6.5  | S3 |
| 1S | IGS-derived satellite | 1.8%  | 6.6  |    |
| 1S | SL_Mbol0014K08        | 0.6%  | 6.7  |    |
|    | Centromere            | 0.0%  | 6.7  |    |
| 1L | SL_EcoRI0016I11       | 2.0%  | 7.1  | S2 |
| 1L | 054N01                | 2.2%  | 7.2  |    |
| 1L | SL_s0006A13           | 3.2%  | 7.3  | S2 |
| 1L | 033N15                | 3.2%  | 7.3  | S4 |
| 1L | 256E08                | 6.3%  | 8.0  |    |
| 1L | SL_s0042B18           | 6.9%  | 8.1  | S4 |
| 1L | SL_Mbol0042O02        | 7.2%  | 8.1  | S5 |
| 1L | 061J17                | 9.5%  | 8.6  |    |
| 1L | 252G05                | 12.8% | 9.3  |    |
| 1L | 017P20                | 18.1% | 10.3 |    |
| 1L | 174H02                | 20.1% | 10.7 |    |
| 1L | 126F09                | 20.7% | 10.9 |    |

|    |                 |       |      |    |
|----|-----------------|-------|------|----|
| 1L | 048O19          | 20.8% | 10.9 |    |
| 1L | Eu/Het border   | 21.0% | 10.9 |    |
| 1L | 023H04          | 21.3% | 11.0 |    |
| 1L | 163B20          | 21.3% | 11.0 |    |
| 1L | 037N04          | 21.6% | 11.0 | S5 |
| 1L | SL_s0040G18     | 21.8% | 11.1 | S6 |
| 1L | 095K03          | 23.9% | 11.5 |    |
| 1L | 033C15          | 25.7% | 11.9 |    |
| 1L | 305F14          | 26.0% | 11.9 |    |
| 1L | 087D19          | 26.8% | 12.1 |    |
| 1L | SL_EcoRI0021C24 | 30.3% | 12.8 | S6 |
| 1L | SL_s0022L14     | 30.6% | 12.9 | S8 |
| 1L | 004L01          | 30.6% | 12.9 |    |
| 1L | 210F09          | 31.6% | 13.1 |    |
| 1L | SL_MboI0017A22  | 32.0% | 13.1 |    |
| 1L | SL_MboI0008G17  | 32.0% | 13.1 |    |
| 1L | SL_MboI0034B03  | 32.4% | 13.2 |    |
| 1L | SL_EcoRI0021A20 | 32.6% | 13.3 |    |
| 1L | SL_EcoRI0022O19 | 34.4% | 13.6 |    |
| 1L | 055E23          | 34.8% | 13.7 |    |
| 1L | 001J06          | 35.0% | 13.7 |    |
| 1L | SL_s0121I01     | 36.0% | 13.9 | S8 |
| 1L | SL_s0071P10     | 36.6% | 14.1 | S7 |
| 1L | 067M04          | 36.8% | 14.1 |    |

|           |                    |              |             |           |
|-----------|--------------------|--------------|-------------|-----------|
| 1L        | 039M19             | 36.8%        | 14.1        |           |
| <b>1L</b> | <b>SL_s0024J19</b> | <b>37.3%</b> | <b>14.2</b> | <b>S9</b> |
| 1L        | 029G15             | 37.3%        | 14.2        |           |
| 1L        | 155M04             | 38.4%        | 14.4        |           |
| <b>1L</b> | <b>006D05</b>      | <b>45.3%</b> | <b>15.8</b> |           |
| 1L        | 329A12             | 49.2%        | 16.6        |           |
| 1L        | 289N16             | 51.3%        | 17.0        |           |
| 1L        | 035M19             | 52.0%        | 17.2        |           |
| 1L        | 182E16             | 52.3%        | 17.2        |           |
| 1L        | 053C22             | 52.3%        | 17.2        |           |
| <b>1L</b> | <b>305L18</b>      | <b>53.2%</b> | <b>17.4</b> |           |
| 1L        | 208M24             | 54.2%        | 17.6        |           |
| 1L        | 034P21             | 55.2%        | 17.8        |           |
| 1L        | 049F03             | 56.1%        | 18.0        |           |
| 1L        | 330O05             | 58.0%        | 18.4        |           |
| 1L        | 108J06             | 58.4%        | 18.4        |           |
| 1L        | 140O23             | 58.6%        | 18.5        |           |
| 1L        | 234D05             | 59.1%        | 18.6        |           |
| 1L        | 080J18             | 59.8%        | 18.7        |           |
| 1L        | 309D12             | 61.5%        | 19.1        |           |
| 1L        | 125A09             | 62.3%        | 19.2        |           |
| 1L        | 203E06             | 63.1%        | 19.4        |           |
| 1L        | 123A07             | 64.0%        | 19.6        |           |
| 1L        | 169H23             | 64.0%        | 19.6        |           |

|    |                 |       |      |
|----|-----------------|-------|------|
| 1L | 058O13          | 64.2% | 19.6 |
| 1L | 057C07          | 66.2% | 20.0 |
| 1L | 159C14          | 66.8% | 20.1 |
| 1L | 165M11          | 66.8% | 20.1 |
| 1L | 051C14          | 67.8% | 20.3 |
| 1L | 010F03          | 68.7% | 20.5 |
| 1L | 005L21          | 69.5% | 20.7 |
| 1L | 001H15          | 70.0% | 20.8 |
| 1L | 302G11          | 70.5% | 20.9 |
| 1L | 057A01          | 72.3% | 21.2 |
| 1L | SL_EcoRI0127B04 | 72.6% | 21.3 |
| 1L | 111D21          | 73.9% | 21.6 |
| 1L | 024O06          | 75.1% | 21.8 |
| 1L | 043D23          | 75.3% | 21.8 |
| 1L | 164M23          | 76.1% | 22.0 |
| 1L | 243A15          | 76.7% | 22.1 |
| 1L | 026N10          | 77.8% | 22.3 |
| 1L | 057J16          | 78.9% | 22.6 |
| 1L | 049P09          | 81.3% | 23.0 |
| 1L | 037D10          | 82.9% | 23.4 |
| 1L | 245N21          | 83.8% | 23.5 |
| 1L | 002F21          | 83.8% | 23.5 |
| 1L | 100N21          | 84.4% | 23.7 |
| 1L | 079N04          | 85.4% | 23.9 |

|           |               |              |             |
|-----------|---------------|--------------|-------------|
| 1L        | 092H13        | 85.4%        | 23.9        |
| <b>1L</b> | <b>033M02</b> | <b>85.7%</b> | <b>23.9</b> |
| 1L        | 239E07        | 89.5%        | 24.7        |
| 1L        | 064D24        | 90.3%        | 24.9        |
| 1L        | 008L19        | 91.3%        | 25.0        |
| 1L        | 131F15        | 94.2%        | 25.6        |

|           |                       |              |             |           |
|-----------|-----------------------|--------------|-------------|-----------|
| 1L        | 128J14                | 95.2%        | 25.8        |           |
| 1L        | 043P11                | 96.7%        | 26.1        |           |
| 1L        | 231M15                | 99.1%        | 26.6        |           |
| 1L        | 088L02                | 99.5%        | 26.7        |           |
| <b>1L</b> | <b>SL_Mbol0028C09</b> | <b>99.8%</b> | <b>26.8</b> | <b>S9</b> |
| 1L        | Telomere              | 100.0%       | 26.8        |           |

|    |                    |        |     |    |
|----|--------------------|--------|-----|----|
| 2S | Telo./Break Point* | 100.0% | 0.0 |    |
| 2S | 45S rDNA           | 16.0%  | 3.0 |    |
| 2S | SL_EcoRI0007F19    | 15.6%  | 3.1 | S4 |
| 2S | SL_EcoRI0008B15    | 14.4%  | 3.3 | S4 |
| 2S | SL_s0053E24        | 14.0%  | 3.4 | S6 |
| 2S | SL_s0044P10        | 13.1%  | 3.5 | S6 |
| 2S | LE_HBa0011G24      | 13.1%  | 3.5 | S5 |
| 2S | SL_s0056I16        | 10.2%  | 4.1 | S5 |
| 2S | SL_Mbol0036C03     | 10.2%  | 4.1 | S1 |
| 2S | SL_Mbol0056H03     | 8.3%   | 4.4 |    |
| 2S | SL_Mbol0063O23     | 8.1%   | 4.5 |    |

|           |                       |             |            |           |
|-----------|-----------------------|-------------|------------|-----------|
| <b>2S</b> | <b>SL_s0079J24</b>    | <b>7.7%</b> | <b>4.5</b> | <b>S1</b> |
| 2S        | SL_Mbol0025G13        | 7.7%        | 4.5        |           |
| 2S        | SL_Mbol0016G20        | 7.7%        | 4.5        |           |
| 2S        | 078N01                | 7.3%        | 4.6        |           |
| 2S        | SL_EcoRI0040P16       | 6.8%        | 4.7        |           |
| 2S        | 009K14                | 6.7%        | 4.7        |           |
| 2S        | 111L05                | 6.7%        | 4.7        |           |
| 2S        | SL_EcoRI0024C17       | 6.6%        | 4.8        |           |
| 2S        | SL_Mbol0034C01        | 6.2%        | 4.8        |           |
| 2S        | SL_Mbol0050I21        | 6.0%        | 4.9        |           |
| 2S        | SL_Mbol0034J07        | 5.9%        | 4.9        |           |
| 2S        | SL_EcoRI0031O09       | 5.9%        | 4.9        |           |
| 2S        | SL_Mbol0004J02        | 5.9%        | 4.9        |           |
| 2S        | 058D23                | 5.7%        | 4.9        |           |
| 2S        | 043D06                | 5.6%        | 4.9        |           |
| 2S        | 060L16                | 5.3%        | 5.0        |           |
| 2S        | 012G12                | 5.3%        | 5.0        |           |
| <b>2S</b> | <b>SL_s0053C07</b>    | <b>5.2%</b> | <b>5.0</b> | <b>S2</b> |
| 2S        | 090J13                | 4.4%        | 5.2        |           |
|           | Centromere            | 0.0%        | 6.0        |           |
| <b>2L</b> | <b>SL_s0050E09</b>    | <b>2.9%</b> | <b>6.5</b> | <b>S2</b> |
| 2L        | 006P20                | 3.2%        | 6.6        |           |
| <b>2L</b> | <b>SL_Mbol0021A03</b> | <b>3.5%</b> | <b>6.7</b> | <b>S3</b> |
| 2L        | 060G11                | 5.5%        | 7.0        |           |



2L IGS-derived satellite 8.4% 7.6

| 2L        | Eu/Het border          | 14.0%        | 8.6        |
|-----------|------------------------|--------------|------------|
| 2L        | 176A14                 | 16.7%        | 9.2        |
| <b>2L</b> | <b>SL_EcoRI0034J17</b> | <b>16.8%</b> | <b>9.2</b> |
| 2L        | SL_Mbol0010K24         | 16.9%        | 9.2        |
| 2L        | SL_EcoRI0032D02        | 17.0%        | 9.2        |
| 2L        | SL_Mbol0050I17         | 17.3%        | 9.3        |
| 2L        | SL_EcoRI0002O15        | 17.3%        | 9.3        |
| 2L        | 060D16                 | 17.4%        | 9.3        |
| 2L        | SL_Mbol0029F22         | 17.5%        | 9.3        |
| <b>2L</b> | <b>101C24</b>          | <b>17.9%</b> | <b>9.4</b> |
| 2L        | 026M09                 | 17.9%        | 9.4        |
| 2L        | 059K12                 | 17.9%        | 9.4        |
| 2L        | SL_EcoRI0006L04        | 18.1%        | 9.4        |
| 2L        | SL_EcoRI0042F18        | 18.1%        | 9.4        |
| 2L        | 027N03                 | 18.2%        | 9.4        |
| 2L        | SL_EcoRI0007J10        | 18.3%        | 9.5        |
| 2L        | SL_EcoRI0039I06        | 18.8%        | 9.6        |
| <b>2L</b> | <b>SL_s0101F18</b>     | <b>18.8%</b> | <b>9.6</b> |
| 2L        | 067G24                 | 18.9%        | 9.6        |
| 2L        | 303I24                 | 26.7%        | 11.0       |
| 2L        | 286I11                 | 65.4%        | 18.4       |
| 2L        | 108A18                 | 69.4%        | 19.1       |
| 2L        | 106H06                 | 72.6%        | 19.7       |

**S3**

**S7**

|    |        |       |      |
|----|--------|-------|------|
| 2L | 118M12 | 73.4% | 19.9 |
| 2L | 001M12 | 77.3% | 20.6 |
| 2L | 189G15 | 77.7% | 20.7 |

|           |                       |               |             |           |
|-----------|-----------------------|---------------|-------------|-----------|
| 2L        | SL_Mbol0055O24        | 95.7%         | 24.1        |           |
| 2L        | 064B17                | 96.2%         | 24.2        |           |
| 2L        | SL_EcoRI0034H10       | 96.3%         | 24.2        |           |
| 2L        | 072B02                | 96.9%         | 24.3        |           |
| 2L        | SL_EcoRI0042D07       | 97.2%         | 24.4        |           |
| 2L        | SL_EcoRI0061K08       | 98.4%         | 24.6        |           |
| 2L        | 257H21                | 98.7%         | 24.7        |           |
| 2L        | 098J01                | 99.1%         | 24.7        |           |
| 2L        | 032J10                | 99.6%         | 24.8        |           |
| 2L        | 177F12                | 99.8%         | 24.9        |           |
| <b>2L</b> | <b>SL_Mbol0017J13</b> | <b>100.0%</b> | <b>24.9</b> | <b>S7</b> |
| 2L        | Telomere              | 100.0%        | 24.9        |           |
| 3S        | Telomere              | 100.0%        | 0.0         |           |
| <b>3S</b> | <b>SL_s0009C01</b>    | <b>99.3%</b>  | <b>0.0</b>  | <b>S1</b> |
| 3S        | 020P05                | 98.0%         | 0.1         |           |
| 3S        | SL_Mbol0103M17        | 96.6%         | 0.2         |           |
| 3S        | 203C09                | 94.8%         | 0.3         |           |
| 3S        | SL_FOS0082H20         | 92.4%         | 0.4         |           |
| 3S        | SL_FOS0097P22         | 92.1%         | 0.4         |           |
| 3S        | 137K15                | 80.6%         | 0.9         |           |
| 3S        | 257N18                | 72.6%         | 1.3         |           |

|           |                    |              |            |           |
|-----------|--------------------|--------------|------------|-----------|
| <b>3S</b> | <b>SL_s0086D22</b> | <b>70.2%</b> | <b>1.4</b> | <b>S1</b> |
| <b>3S</b> | <b>SL_s0018K15</b> | <b>65.1%</b> | <b>1.7</b> | <b>S4</b> |
| 3S        | 030A11             | 65.0%        | 1.7        |           |
| 3S        | 031M05             | 62.1%        | 1.8        |           |
| <b>3S</b> | <b>SL_s0002G24</b> | <b>54.9%</b> | <b>2.2</b> | <b>S4</b> |
| <b>3S</b> | <b>SL_s0050E05</b> | <b>52.5%</b> | <b>2.3</b> | <b>S5</b> |
| <b>3S</b> | <b>037B06</b>      | <b>34.2%</b> | <b>3.2</b> | <b>S5</b> |
| <b>3S</b> | <b>020G20</b>      | <b>29.8%</b> | <b>3.4</b> | <b>S6</b> |

|           |                        |              |            |           |
|-----------|------------------------|--------------|------------|-----------|
| <b>3S</b> | <b>Eu/Het border</b>   | <b>25.0%</b> | <b>3.6</b> |           |
| 3S        | 130G19                 | 17.9%        | 3.9        |           |
| 3S        | 162G22                 | 16.2%        | 4.0        |           |
| <b>3S</b> | <b>039C15</b>          | <b>10.2%</b> | <b>4.3</b> | <b>S6</b> |
| 3S        | IGS-derived satellite  | 1.9%         | 4.7        |           |
|           | <b>Centromere</b>      | <b>0.0%</b>  | <b>4.8</b> |           |
| <b>3L</b> | <b>SL_Mbol0079O10</b>  | <b>0.5%</b>  | <b>4.9</b> | <b>S9</b> |
| 3L        | 007J09                 | 3.7%         | 5.4        |           |
| <b>3L</b> | <b>SL_Mbol0002J15</b>  | <b>4.3%</b>  | <b>5.5</b> | <b>S9</b> |
| <b>3L</b> | <b>244B01</b>          | <b>4.7%</b>  | <b>5.5</b> | <b>S7</b> |
| <b>3L</b> | <b>SL_EcoRI0121G21</b> | <b>6.5%</b>  | <b>5.8</b> | <b>S7</b> |
| <b>3L</b> | <b>027L13</b>          | <b>7.4%</b>  | <b>6.0</b> | <b>S8</b> |
| 3L        | 197O22                 | 10.7%        | 6.5        |           |
| 3L        | 014A17                 | 15.3%        | 7.2        |           |
| 3L        | 077H15                 | 15.6%        | 7.2        |           |
| <b>3L</b> | <b>SL_s0071G06</b>     | <b>21.5%</b> | <b>8.2</b> | <b>S8</b> |

|    |                 |       |      |     |
|----|-----------------|-------|------|-----|
| 3L | SL_s0042B23     | 22.3% | 8.3  | S2  |
| 3L | SL_Mbol0022A20  | 22.4% | 8.3  |     |
| 3L | SL_Mbol0018H18  | 22.6% | 8.3  |     |
| 3L | 157B13          | 23.1% | 8.4  |     |
| 3L | 011P01          | 23.2% | 8.4  |     |
| 3L | SL_Mbol0023D14  | 23.2% | 8.4  |     |
| 3L | 084A03          | 23.4% | 8.5  |     |
| 3L | SL_EcoRI0018K21 | 23.4% | 8.5  | S12 |
| 3L | 028L03          | 23.7% | 8.5  | S12 |
| 3L | SL_Mbol0011B02  | 24.0% | 8.6  |     |
| 3L | 011C02          | 25.9% | 8.9  |     |
| 3L | 037N01          | 26.1% | 8.9  | S10 |
| 3L | SL_Mbol0015M02  | 26.2% | 8.9  |     |
| 3L | 030A19          | 26.3% | 8.9  | S2  |
| 3L | 299H10          | 26.5% | 9.0  |     |
| 3L | Eu/Het border   | 28.0% | 9.2  |     |
| 3L | 031P17          | 35.5% | 10.4 |     |
| 3L | 101C24          | 37.9% | 10.7 |     |
| 3L | 001H05          | 38.2% | 10.8 | S10 |
| 3L | 028E17          | 38.8% | 10.9 |     |
| 3L | 254B14          | 39.1% | 10.9 |     |
| 3L | SL_Mbol0003H09  | 39.6% | 11.0 | S11 |
| 3L | SL_s0003D15     | 47.7% | 12.3 |     |
| 3L | SL_EcoRI0031G05 | 55.0% | 13.4 | S11 |

|    |                 |       |      |     |
|----|-----------------|-------|------|-----|
| 3L | SL_Mbol0015G06  | 57.4% | 13.8 | S3  |
| 3L | SL_s0048H23     | 57.7% | 13.9 | S3  |
| 3L | SL_EcoRI0034O23 | 57.9% | 13.9 |     |
| 3L | 117I12          | 58.4% | 14.0 |     |
| 3L | SL_EcoRI0006F17 | 59.8% | 14.2 | S13 |
| 3L | 157P11          | 78.3% | 17.1 |     |
| 3L | 276M05          | 80.2% | 17.4 |     |

|    |                 |        |      |     |
|----|-----------------|--------|------|-----|
| 3L | 241F16          | 94.2%  | 19.6 |     |
| 3L | 142A05          | 96.0%  | 19.9 |     |
| 3L | 159C06          | 97.0%  | 20.0 |     |
| 3L | SL_EcoRI0034G21 | 99.3%  | 20.4 | S13 |
| 3L | Telomere        | 100.0% | 20.5 |     |
| 4S | Telomere        | 100.0% | 0.0  |     |
| 4S | SL_Mbol0035I14  | 97.9%  | 0.1  | S1  |
| 4S | 008K08          | 73.6%  | 1.3  |     |
| 4S | 036C23          | 60.3%  | 2.0  |     |
| 4S | 323C04          | 49.1%  | 2.6  |     |
| 4S | Eu/Het border   | 39.0%  | 3.1  |     |
| 4S | 062J03          | 32.6%  | 3.4  |     |
| 4S | 209A01          | 30.8%  | 3.5  |     |
| 4S | 012B20          | 14.7%  | 4.4  | S1  |
| 4S | SL_EcoRI0036D15 | 13.6%  | 4.4  | S3  |
| 4S | 018I03          | 1.0%   | 5.0  | S3  |
|    | Centromere      | 0.0%   | 5.1  |     |

|           |                       |              |             |           |
|-----------|-----------------------|--------------|-------------|-----------|
| 4L        | SL_EcoRI0027P01       | 0.3%         | 5.1         |           |
| <b>4L</b> | <b>SL_Mbol0036H17</b> | <b>0.9%</b>  | <b>5.2</b>  | <b>S2</b> |
| 4L        | 059C20                | 8.2%         | 6.2         |           |
| 4L        | 105J24                | 12.0%        | 6.7         |           |
| 4L        | 030F21                | 16.1%        | 7.2         |           |
| 4L        | 007D04                | 16.5%        | 7.3         |           |
| 4L        | 203K18                | 17.8%        | 7.4         |           |
| <b>4L</b> | <b>SL_Mbol0016J15</b> | <b>19.9%</b> | <b>7.7</b>  | <b>S2</b> |
| <b>4L</b> | <b>SL_Mbol0038M16</b> | <b>20.1%</b> | <b>7.8</b>  | <b>S4</b> |
| 4L        | 006E18                | 24.5%        | 8.3         |           |
| 4L        | SL_Mbol0078A08        | 24.8%        | 8.4         |           |
| 4L        | SL_Mbol0120F05        | 29.6%        | 9.0         |           |
| 4L        | Eu/Het border         | 33.0%        | 9.5         |           |
| 4L        | 291H22                | 37.3%        | 10.0        |           |
| 4L        | 119A16                | 38.0%        | 10.1        |           |
| 4L        | 020F17                | 40.7%        | 10.5        |           |
| 4L        | 077O05                | 44.8%        | 11.0        |           |
| 4L        | 078E04                | 50.9%        | 11.8        |           |
| 4L        | 208L16                | 54.4%        | 12.3        |           |
| <b>4L</b> | <b>SL_Mbol0029O16</b> | <b>54.6%</b> | <b>12.3</b> | <b>S4</b> |
| <b>4L</b> | <b>013P02</b>         | <b>54.9%</b> | <b>12.3</b> | <b>S5</b> |
| 4L        | 132O11                | 54.9%        | 12.3        |           |
| 4L        | 171B19                | 55.5%        | 12.4        |           |
| <b>4L</b> | <b>SL_Mbol0018D12</b> | <b>57.9%</b> | <b>12.7</b> | <b>S5</b> |

|           |                       |              |             |           |
|-----------|-----------------------|--------------|-------------|-----------|
| 4L        | Chromomere            | 58.1%        | 12.8        |           |
| <b>4L</b> | <b>020C13</b>         | <b>59.5%</b> | <b>13.0</b> | <b>S6</b> |
| 4L        | 094K06                | 59.2%        | 12.9        |           |
| 4L        | SL_Mbol0039E17        | 65.2%        | 13.7        |           |
| 4L        | 053M02                | 74.6%        | 14.9        |           |
| 4L        | 008K13                | 82.3%        | 16.0        |           |
| 4L        | 303A06                | 95.4%        | 17.7        |           |
| 4L        | 106F07                | 98.2%        | 18.1        |           |
| <b>4L</b> | <b>SL_Mbol0023M21</b> | <b>98.9%</b> | <b>18.2</b> | <b>S6</b> |
| 4L        | Telomere              | 100.0%       | 18.3        |           |
| 5S        | Telomere              | 100.0%       | 0.0         |           |
| <b>5S</b> | <b>SL_s0094J05</b>    | <b>98.9%</b> | <b>0.1</b>  | <b>S1</b> |
| 5S        | 189E17                | 90.6%        | 0.7         |           |
| 5S        | 309L13                | 76.6%        | 1.7         |           |
| 5S        | 147F10                | 67.4%        | 2.3         |           |
| 5S        | 157F14                | 63.5%        | 2.6         |           |
| 5S        | 298C03                | 54.7%        | 3.2         |           |
| 5S        | 149J17                | 40.4%        | 4.2         |           |
| 5S        | Eu/Het border         | 40.0%        | 4.3         |           |
| 5S        | 116D11                | 30.2%        | 5.0         |           |
| 5S        | 282A06                | 28.3%        | 5.1         |           |
| 5S        | 255N21                | 27.6%        | 5.1         |           |
| 5S        | 303C11                | 20.5%        | 5.6         |           |
| 5S        | 107A04                | 19.1%        | 5.7         |           |

|    |                 |        |      |    |
|----|-----------------|--------|------|----|
| 5S | 011G20          | 7.9%   | 6.5  |    |
|    | Centromere      | 0.0%   | 7.1  |    |
| 5L | SL_Mbol0058F07  | 8.5%   | 7.7  |    |
| 5L | 164O03          | 10.2%  | 7.9  |    |
| 5L | 091D14          | 18.8%  | 8.5  |    |
| 5L | 033M02          | 27.6%  | 9.2  |    |
| 5L | 002J04          | 27.8%  | 9.2  | S1 |
| 5L | SL_s0031L05     | 29.5%  | 9.3  | S2 |
| 5L | SL_s0084H11     | 32.4%  | 9.5  | S2 |
| 5L | 016D20          | 34.1%  | 9.7  | S3 |
| 5L | SL_EcoRI0012L12 | 34.1%  | 9.7  |    |
| 5L | Eu/Het border   | 40.0%  | 10.1 |    |
| 5L | 006D05          | 43.4%  | 10.4 |    |
| 5L | 169M21          | 62.6%  | 11.8 |    |
| 5L | 138J03          | 72.4%  | 12.5 |    |
| 5L | 100I16          | 95.5%  | 14.3 |    |
| 5L | 251J13          | 98.0%  | 14.5 |    |
| 5L | SL_EcoRI0004N07 | 99.3%  | 14.5 | S3 |
| 5L | Telomere        | 100.0% | 14.6 |    |
| 6S | Telomere        | 100.0% | 0.0  |    |
| 6S | SL_Mbol0032G06  | 98.8%  | 0.0  | S1 |
| 6S | 251G05          | 76.6%  | 0.9  |    |
| 6S | 250I21          | 63.7%  | 1.3  |    |
| 6S | 024L21          | 61.4%  | 1.4  |    |



|           |                       |              |            |
|-----------|-----------------------|--------------|------------|
| 6S        | 095C08                | 56.8%        | 1.6        |
| 6S        | SL_Mbol0134P07        | 51.8%        | 1.8        |
| <b>6S</b> | <b>Eu/Het border</b>  | <b>49.0%</b> | <b>1.9</b> |
| 6S        | 008F19                | 48.9%        | 1.9        |
| 6S        | 097D13                | 39.4%        | 2.2        |
| <b>6S</b> | <b>028K02</b>         | <b>36.4%</b> | <b>2.4</b> |
| 6S        | SL_EcoRI0056L08       | 32.6%        | 2.5        |
| 6S        | SL_EcoRI0047D19       | 31.7%        | 2.5        |
| 6S        | SL_EcoRI0005K11       | 30.9%        | 2.6        |
| 6S        | SL_EcoRI0031A01       | 30.8%        | 2.6        |
| 6S        | SL_EcoRI0035D19       | 30.5%        | 2.6        |
| 6S        | SL_Mbol0049I18        | 29.8%        | 2.6        |
| 6S        | LE_HBa0029E01         | 29.6%        | 2.6        |
| 6S        | 027D17                | 28.9%        | 2.6        |
| 6S        | 176D13                | 28.7%        | 2.6        |
| 6S        | 078K13                | 28.7%        | 2.6        |
| 6S        | 002P09                | 28.6%        | 2.6        |
| 6S        | SL_Mbol0016K18        | 28.1%        | 2.7        |
| <b>6S</b> | <b>025N04</b>         | <b>27.8%</b> | <b>2.7</b> |
| 6S        | SL_EcoRI0021L01       | 27.6%        | 2.7        |
| 6S        | 001E08                | 27.3%        | 2.7        |
| 6S        | IGS-derived satellite | 27.1%        | 2.7        |
| <b>6S</b> | <b>SL_Mbol0029F23</b> | <b>26.4%</b> | <b>2.7</b> |
| 6S        | SL_EcoRI0013G12       | 25.8%        | 2.7        |

**S1**

**S3**

**S3**

|    |                 |       |      |    |
|----|-----------------|-------|------|----|
| 6S | SL_EcoRI0040C12 | 23.9% | 2.8  | S2 |
| 6S | SL_MboI0081L19  | 17.7% | 3.0  |    |
| 6S | 068M22          | 15.2% | 4.6  |    |
| 6S | 057J04          | 2.7%  | 3.3  |    |
|    | Centromere      | 0.0%  | 3.7  |    |
| 6L | SL_EcoRI0013C07 | 3.4%  | 4.1  | S2 |
| 6L | SL_MboI0029C07  | 3.9%  | 4.2  | S4 |
| 6L | 031J01          | 5.6%  | 4.4  |    |
| 6L | SL_MboI0034N14  | 6.1%  | 4.5  |    |
| 6L | 188N10          | 13.2% | 5.4  |    |
| 6L | SL_EcoRI0009J17 | 16.5% | 5.8  | S4 |
| 6L | SL_EcoRI0033O20 | 16.7% | 5.8  | S5 |
| 6L | SL_MboI0018M19  | 16.9% | 5.8  |    |
| 6L | SL_EcoRI0040G06 | 17.7% | 5.9  |    |
| 6L | 031J01          | 17.9% | 6.0  | S5 |
| 6L | SL_MboI0034N14  | 18.1% | 6.0  | S6 |
| 6L | SL_MboI0029D03  | 18.7% | 6.1  |    |
| 6L | SL_EcoRI0001M14 | 19.8% | 6.2  |    |
| 6L | SL_EcoRI0027F24 | 19.9% | 6.2  |    |
| 6L | 055B14          | 20.9% | 6.3  |    |
| 6L | Eu/Het border   | 21.0% | 6.4  |    |
| 6L | SL_EcoRI0023E10 | 37.1% | 8.4  | S6 |
| 6L | SL_EcoRI0018M04 | 39.2% | 8.7  | S7 |
| 6L | SL_MboI0030C09  | 57.0% | 10.9 |    |

|           |                        |              |             |           |
|-----------|------------------------|--------------|-------------|-----------|
| 6L        | 081D06                 | 60.1%        | 11.3        |           |
| 6L        | 146O07                 | 80.6%        | 13.9        |           |
| <b>6L</b> | <b>SL_EcoRI0008B16</b> | <b>88.2%</b> | <b>14.9</b> | <b>S7</b> |
| <b>6L</b> | <b>LE_HBa0025F06</b>   | <b>90.0%</b> | <b>15.1</b> | <b>S8</b> |
| 6L        | 068M14                 | 91.0%        | 15.3        |           |
| 6L        | 184G14                 | 96.1%        | 15.9        |           |
| 6L        | 098L02                 | 98.1%        | 16.2        |           |
| <b>6L</b> | <b>SL_EcoRI0019F04</b> | <b>99.5%</b> | <b>16.3</b> | <b>S8</b> |
| 6L        | Telomere               | 100.0%       | 16.4        |           |
| 7S        | Telomere               | 100.0%       | 0.0         |           |
| 7S        | 193E01                 | 99.1%        | 0.1         |           |
| <b>7S</b> | <b>SL_EcoRI0006L14</b> | <b>98.0%</b> | <b>0.1</b>  | <b>S1</b> |
| 7S        | 002D20                 | 97.5%        | 0.1         |           |
| 7S        | 095C18                 | 97.1%        | 0.2         |           |
| 7S        | 007H24                 | 96.6%        | 0.2         |           |
| 7S        | 111F22                 | 95.5%        | 0.3         |           |
| 7S        | 150H03                 | 94.5%        | 0.3         |           |
| 7S        | SL_EcoRI0042G10        | 83.0%        | 1.0         |           |
| 7S        | SL_EcoRI0025E06        | 57.1%        | 2.4         |           |
| 7S        | SL_Mbol0137E08         | 52.0%        | 2.7         |           |
| 7S        | 173A21                 | 50.2%        | 2.8         |           |
| 7S        | SL_EcoRI0008H22        | 47.2%        | 3.0         |           |
| 7S        | SL_Mbol0024O10         | 46.3%        | 3.0         |           |
| 7S        | 325D07                 | 44.0%        | 3.1         |           |

|           |                        |              |            |           |
|-----------|------------------------|--------------|------------|-----------|
| 7S        | Eu/Het border          | 40.0%        | 3.4        |           |
| 7S        | 293I23                 | 33.0%        | 3.8        |           |
|           | Centromere             | 0.0%         | 5.6        |           |
| <b>7L</b> | <b>SL_Mbol0016H01</b>  | <b>10.0%</b> | <b>6.6</b> | <b>S1</b> |
| <b>7L</b> | <b>032J14</b>          | <b>10.6%</b> | <b>6.7</b> | <b>S2</b> |
| 7L        | 003K20                 | 13.6%        | 7.0        |           |
| 7L        | 082D04                 | 15.4%        | 7.2        |           |
| 7L        | 027F11                 | 19.3%        | 7.6        |           |
| 7L        | SL_EcoRI0021M11        | 19.5%        | 7.6        |           |
| <b>7L</b> | <b>SL_EcoRI0016C19</b> | <b>19.7%</b> | <b>7.6</b> | <b>S2</b> |
| 7L        | SL_EcoRI0041L20        | 19.9%        | 7.6        |           |
| 7L        | SL_EcoRI0041L23        | 19.9%        | 7.6        |           |
| 7L        | 042K23                 | 20.5%        | 7.7        |           |
| 7L        | 036D05                 | 21.1%        | 7.8        |           |
| 7L        | 025A06                 | 21.3%        | 7.8        |           |
| 7L        | SL_Mbol0017P20         | 21.5%        | 7.8        |           |
| 7L        | SL_Mbol0017I04         | 21.5%        | 7.8        |           |
| <b>7L</b> | <b>001O15</b>          | <b>22.5%</b> | <b>7.9</b> | <b>S3</b> |
| 7L        | 012C17                 | 23.1%        | 8.0        |           |
| 7L        | 034B22                 | 27.8%        | 8.5        |           |
| 7L        | 188B22                 | 29.9%        | 8.7        |           |
| 7L        | 224G23                 | 32.1%        | 8.9        |           |
| <b>7L</b> | <b>Eu/Het border</b>   | <b>34.0%</b> | <b>9.1</b> |           |
| 7L        | 041L08                 | 36.3%        | 9.3        |           |

|           |                        |              |             |           |
|-----------|------------------------|--------------|-------------|-----------|
| 7L        | 106F06                 | 38.4%        | 9.6         |           |
| 7L        | SL_Mbol0141H03         | 40.5%        | 9.8         |           |
| 7L        | SL_EcoRI0101G19        | 42.5%        | 10.0        |           |
| 7L        | SL_EcoRI0095F20        | 75.0%        | 13.3        |           |
| <b>7L</b> | <b>SL_EcoRI0032D11</b> | <b>77.5%</b> | <b>13.6</b> | <b>S3</b> |
| <b>7L</b> | <b>024C10</b>          | <b>78.8%</b> | <b>13.7</b> | <b>S4</b> |
| 7L        | 308M01                 | 83.0%        | 14.1        |           |
| 7L        | 079F09                 | 84.0%        | 14.2        |           |
| 7L        | 227C07                 | 86.2%        | 14.5        |           |
| 7L        | 178O02                 | 88.7%        | 14.7        |           |
| 7L        | 130B18                 | 89.0%        | 14.8        |           |
| 7L        | 226J04                 | 89.4%        | 14.8        |           |
| 7L        | 059P18                 | 90.3%        | 14.9        |           |
| 7L        | 261J23                 | 91.9%        | 15.1        |           |
| 7L        | 167K07                 | 98.0%        | 15.7        |           |
| 7L        | 179K09                 | 98.0%        | 15.7        |           |
| <b>7L</b> | <b>SL_Mbol0017L19</b>  | <b>98.2%</b> | <b>15.7</b> | <b>S4</b> |
| 7L        | 215P04                 | 99.7%        | 15.9        |           |
| 7L        | Telomere               | 100.0%       | 15.9        |           |
| 8S        | Telomere               | 100.0%       | 0.0         |           |
| <b>8S</b> | <b>030O09</b>          | <b>98.5%</b> | <b>0.1</b>  | <b>S1</b> |
| 8S        | 025I17                 | 87.1%        | 0.6         |           |
| 8S        | 216M19                 | 85.9%        | 0.7         |           |
| 8S        | 270A17                 | 82.8%        | 0.8         |           |

|    |                       |       |     |    |
|----|-----------------------|-------|-----|----|
| 8S | 008J16                | 68.5% | 1.5 | S1 |
| 8S | 015E06                | 62.8% | 1.8 | S2 |
| 8S | Eu/Het border         | 45.0% | 2.7 |    |
| 8S | 009K19                | 38.5% | 3.0 | S2 |
| 8S | SL_EcoRI0002D11       | 36.5% | 3.1 |    |
| 8S | LE_HBa0041G04         | 35.7% | 3.2 |    |
| 8S | SL_Mbol0012I24        | 35.2% | 3.2 | S7 |
| 8S | SL_Mbol0041D13        | 34.9% | 3.2 |    |
| 8S | IGS-derived satellite | 34.6% | 3.2 |    |
| 8S | SL_s0093G06           | 33.0% | 3.3 | S5 |
| 8S | SL_s0030B23           | 28.3% | 3.5 | S5 |
| 8S | SL_s0105O13           | 27.4% | 3.6 | S6 |
|    | Centromere            | 0.0%  | 4.9 |    |
| 8L | SL_EcoRI0008F12       | 3.1%  | 5.3 |    |
| 8L | SL_Mbol0012P13        | 3.7%  | 5.3 |    |
| 8L | SL_Mbol0005G10        | 7.7%  | 5.8 | S6 |
| 8L | SL_s0078C24           | 8.0%  | 5.8 | S3 |
| 8L | 213E05                | 11.8% | 6.3 |    |
| 8L | SL_s0058J24           | 17.0% | 6.9 | S3 |
| 8L | SL_EcoRI0024O12       | 18.2% | 7.0 | S4 |
| 8L | 034L18                | 23.4% | 7.6 |    |
| 8L | SL_Mbol0019D14        | 24.6% | 7.8 | S4 |
| 8L | SL_Mbol0012P13        | 25.7% | 7.9 |    |
| 8L | 033A16                | 26.0% | 7.9 | S8 |

|    |                 |        |      |    |
|----|-----------------|--------|------|----|
| 8L | 027D09          | 27.6%  | 8.1  |    |
| 8L | SL_EcoRI0027A06 | 31.4%  | 8.6  |    |
| 8L | SL_EcoRI0039B17 | 32.0%  | 8.6  |    |
| 8L | Eu/Het border   | 32.0%  | 8.6  |    |
| 8L | 160L02          | 32.1%  | 8.7  |    |
| 8L | 225C20          | 33.1%  | 8.8  |    |
| 8L | 076I13          | 38.3%  | 9.4  |    |
| 8L | Chromomere      | 58.6%  | 11.8 |    |
| 8L | SL_Mbol0007C12  | 58.7%  | 11.8 | S8 |
| 8L | SL_s0082B11     | 60.2%  | 11.9 | S9 |
| 8L | 005L01          | 99.6%  | 16.6 |    |
| 8L | SL_EcoRI0040H01 | 99.7%  | 16.6 | S9 |
| 8L | Telomere        | 100.0% | 16.6 |    |
| 9S | Telomere        | 100.0% | 0.0  |    |
| 9S | SL_Mbol0032A02  | 99.4%  | 0.0  | S1 |
| 9S | 026I24          | 99.3%  | 0.0  |    |
| 9S | 072G22          | 88.9%  | 0.6  |    |
| 9S | 116C14          | 84.9%  | 0.8  |    |
| 9S | 168F14          | 77.9%  | 1.2  |    |
| 9S | 203J14          | 77.6%  | 1.3  |    |
| 9S | 300E15          | 64.5%  | 2.0  |    |
| 9S | 026P14          | 63.4%  | 2.1  |    |
| 9S | 255E01          | 56.9%  | 2.4  |    |
| 9S | SL_Mbol0080E11  | 48.9%  | 2.9  |    |

9S 300E15 47.5% 2.9

9S 026P14 47.3% 3.0

|    |                 |       |      |    |
|----|-----------------|-------|------|----|
| 9S | 308C20          | 41.6% | 3.3  |    |
| 9S | Eu/Het border   | 40.0% | 3.4  |    |
| 9S | 197E10          | 28.3% | 4.0  |    |
| 9S | SL_MboI0056H18  | 9.4%  | 5.1  |    |
| 9S | 072H18          | 6.6%  | 5.2  |    |
| 9S | SL_MboI0025N23  | 5.8%  | 5.3  | S1 |
| 9S | SL_MboI0045G03  | 3.4%  | 5.4  |    |
| 9S | SL_EcoRI0052D12 | 3.4%  | 5.4  |    |
| 9S | SL_EcoRI0015A15 | 2.3%  | 5.5  | S4 |
|    | Centromere      | 0.0%  | 5.6  |    |
| 9L | SL_EcoRI0025E12 | 7.2%  | 6.3  | S4 |
| 9L | SL_EcoRI0018E08 | 8.2%  | 6.4  | S3 |
| 9L | 061J21          | 11.0% | 6.7  |    |
| 9L | 075M11          | 11.8% | 6.8  |    |
| 9L | LE_HBa0005G01   | 13.5% | 7.0  | S3 |
| 9L | SL_MboI0013P10  | 15.0% | 7.1  | S5 |
| 9L | SL_EcoRI0022O16 | 15.3% | 7.2  | S5 |
| 9L | SL_MboI0018I03  | 16.9% | 7.3  | S6 |
| 9L | 107D15          | 31.3% | 8.8  |    |
| 9L | Eu/Het border   | 34.0% | 9.1  |    |
| 9L | 099F14          | 61.2% | 11.9 |    |
| 9L | LE_HBa0005M15   | 62.7% | 12.1 | S6 |



|           |                        |              |             |            |
|-----------|------------------------|--------------|-------------|------------|
| 9L        | 107P11                 | 63.7%        | 12.2        |            |
| <b>9L</b> | <b>SL_FOS0051C04</b>   | <b>64.2%</b> | <b>12.2</b> | <b>S2</b>  |
| <b>9L</b> | <b>SL_Mbol0019G06</b>  | <b>64.6%</b> | <b>12.3</b> | <b>S7</b>  |
| 9L        | 099P03                 | 70.7%        | 12.9        |            |
| 9L        | 278J12                 | 71.6%        | 13.0        |            |
| 9L        | 248I10                 | 72.3%        | 13.0        |            |
| <b>9L</b> | <b>SL_Mbol0020M04</b>  | <b>74.5%</b> | <b>13.3</b> | <b>S7</b>  |
| <b>9L</b> | <b>SL_Mbol0025N11</b>  | <b>77.9%</b> | <b>13.6</b> | <b>S8</b>  |
| <b>9L</b> | <b>LE_HBa0010F04</b>   | <b>81.6%</b> | <b>14.0</b> | <b>S8</b>  |
| <b>9L</b> | <b>LE_HBa0001I06</b>   | <b>82.7%</b> | <b>14.1</b> | <b>S9</b>  |
| 9L        | 245E05                 | 88.2%        | 14.7        |            |
| <b>9L</b> | <b>SL_EcoRI0024O21</b> | <b>91.9%</b> | <b>15.1</b> | <b>S9</b>  |
| <b>9L</b> | <b>SL_Mbol0037I08</b>  | <b>95.3%</b> | <b>15.4</b> | <b>S10</b> |

|            |                        |              |             |            |
|------------|------------------------|--------------|-------------|------------|
| 9L         | 165P17                 | 95.4%        | 15.4        |            |
| 9L         | 109D11                 | 97.5%        | 15.6        |            |
| <b>9L</b>  | <b>SL_Mbol0022L14</b>  | <b>99.2%</b> | <b>15.8</b> | <b>S10</b> |
| 9L         | SL_Mbol0042F10         | 99.6%        | 15.9        |            |
| 9L         | Telomere               | 100.0%       | 15.9        |            |
| 10S        | Telomere               | 100.0%       | 0.0         |            |
| <b>10S</b> | <b>SL_EcoRI0027L04</b> | <b>98.5%</b> | <b>0.1</b>  | <b>S1</b>  |
| 10S        | 060A06                 | 91.6%        | 0.4         |            |
| 10S        | 091N19                 | 88.4%        | 0.6         |            |
| 10S        | 012D17                 | 87.3%        | 0.6         |            |
| 10S        | 176H22                 | 87.2%        | 0.6         |            |

|     |                        |              |            |           |
|-----|------------------------|--------------|------------|-----------|
| 10S | 155I21                 | 76.8%        | 1.1        |           |
| 10S | 222H10                 | 75.4%        | 1.2        |           |
| 10S | SL_EcoRI0076M19        | 70.5%        | 1.4        |           |
| 10S | 028O04                 | 69.9%        | 1.4        |           |
| 10S | 041K23                 | 56.3%        | 2.1        |           |
| 10S | <b>SL_EcoRI0009D07</b> | <b>52.3%</b> | <b>2.3</b> | <b>S1</b> |
| 10S | <b>023E16</b>          | <b>51.7%</b> | <b>2.3</b> | <b>S2</b> |
| 10S | 201C12                 | 50.7%        | 2.4        |           |
| 10S | Eu/Het border          | 46.0%        | 2.6        |           |
| 10S | 205L07                 | 30.5%        | 3.3        |           |
| 10S | SL_MboI0020C04         | 27.5%        | 3.5        |           |
| 10S | 036L10                 | 23.2%        | 3.7        |           |
| 10S | 111D09                 | 19.1%        | 3.9        |           |
| 10S | 105C09                 | 17.5%        | 4.0        |           |
| 10S | SL_EcoRI0040D01        | 14.5%        | 4.1        |           |
| 10S | <b>SL_s0071N16</b>     | <b>11.3%</b> | <b>4.3</b> | <b>S2</b> |
| 10S | 237A02                 | 10.8%        | 4.3        |           |
| 10S | <b>SL_EcoRI0029F05</b> | <b>9.6%</b>  | <b>4.3</b> | <b>S4</b> |
|     | Centromere             | 0.0%         | 4.8        |           |
| 10L | <b>SL_MboI0011N01</b>  | <b>6.2%</b>  | <b>5.4</b> | <b>S4</b> |
| 10L | <b>SL_s0042K13</b>     | <b>6.5%</b>  | <b>5.5</b> | <b>S3</b> |
| 10L | 115K16                 | 10.8%        | 5.9        |           |
| 10L | 114B06                 | 16.6%        | 6.5        |           |
| 10L | 043B12                 | 26.3%        | 7.5        |           |

|            |                        |              |             |           |
|------------|------------------------|--------------|-------------|-----------|
| 10L        | 037N23                 | 26.4%        | 7.5         |           |
| 10L        | Eu/Het border          | 33.0%        | 8.1         |           |
| 10L        | 044O20                 | 39.6%        | 8.8         |           |
| 10L        | 045L17                 | 43.8%        | 9.2         |           |
| 10L        | 053L19                 | 49.1%        | 9.8         |           |
| <b>10L</b> | <b>SL_s0121P17</b>     | <b>53.2%</b> | <b>10.2</b> | <b>S3</b> |
| <b>10L</b> | <b>SL_FOS0014E24</b>   | <b>54.3%</b> | <b>10.3</b> | <b>S5</b> |
| <b>10L</b> | <b>SL_EcoRI0036N16</b> | <b>55.3%</b> | <b>10.4</b> | <b>S6</b> |
| 10L        | SL_EcoRI0013B18        | 56.3%        | 10.5        |           |
| 10L        | 204I05                 | 57.7%        | 10.6        |           |
| 10L        | 189B10                 | 58.5%        | 10.7        |           |
| 10L        | 022B11                 | 58.7%        | 10.7        |           |
| 10L        | 044H12                 | 61.7%        | 11.0        |           |
| 10L        | 188N09                 | 62.1%        | 11.1        |           |
| 10L        | 071D20                 | 62.9%        | 11.1        |           |
| 10L        | 020A12                 | 63.1%        | 11.2        |           |
| 10L        | 248A13                 | 63.5%        | 11.2        |           |
| 10L        | 234C10                 | 64.1%        | 11.3        |           |
| 10L        | 156C03                 | 64.6%        | 11.3        |           |
| 10L        | 057G01                 | 71.3%        | 12.0        |           |
| 10L        | 206B16                 | 71.8%        | 12.0        |           |
| 10L        | 005D06                 | 76.1%        | 12.5        |           |
| 10L        | 256L16                 | 78.5%        | 12.7        |           |
| 10L        | 021O12                 | 79.2%        | 12.8        |           |

|            |                        |              |             |           |
|------------|------------------------|--------------|-------------|-----------|
| 10L        | 334K22                 | 82.8%        | 13.2        |           |
| 10L        | 049K02                 | 86.1%        | 13.5        |           |
| 10L        | 011E16                 | 89.9%        | 13.9        |           |
| 10L        | 181E17                 | 94.7%        | 14.4        |           |
| 10L        | 013B20                 | 96.0%        | 14.5        |           |
| <b>10L</b> | <b>SL_EcoRI0008A07</b> | <b>99.6%</b> | <b>14.9</b> | <b>S6</b> |
| 10L        | Telomere               | 100.0%       | 14.9        |           |
| 11S        | Telomere               | 100.0%       | 0.0         |           |
| <b>11S</b> | <b>SL_s0029B21</b>     | <b>98.6%</b> | <b>0.1</b>  | <b>S1</b> |
| 11S        | 168B23                 | 97.2%        | 0.2         |           |
| 11S        | 024K09                 | 63.9%        | 2.3         |           |
| 11S        | 027B05                 | 63.6%        | 2.4         |           |
| 11S        | 015A13                 | 58.0%        | 2.7         |           |
| 11S        | SL_MboI121I03          | 42.2%        | 3.8         |           |
| 11S        | 034I10                 | 41.8%        | 3.8         |           |
| 11S        | 214E16                 | 41.4%        | 3.8         |           |
| 11S        | 080C09                 | 41.0%        | 3.8         |           |
| 11S        | 128G07                 | 40.5%        | 3.9         |           |
| 11S        | 064J13                 | 39.9%        | 3.9         |           |
| 11S        | 291F09                 | 39.2%        | 4.0         |           |
| 11S        | SL_MboI0052K14         | 37.7%        | 4.1         |           |
| 11S        | Eu/Het border          | 32.0%        | 4.4         |           |
| <b>11S</b> | <b>SL_EcoRI0018D15</b> | <b>17.9%</b> | <b>5.3</b>  | <b>S1</b> |
| <b>11S</b> | <b>008F06</b>          | <b>16.7%</b> | <b>5.4</b>  | <b>S4</b> |

|     |                       |       |      |    |
|-----|-----------------------|-------|------|----|
| 11S | 023H04                | 13.7% | 5.6  |    |
| 11S | 004F15                | 11.7% | 5.7  | S4 |
| 11S | IGS-derived satellite | 11.0% | 5.8  |    |
| 11S | SL_s0082L15           | 10.1% | 5.8  | S2 |
|     | Centromere            | 0.0%  | 6.5  |    |
| 11L | 305L18                | 6.6%  | 7.0  |    |
| 11L | 187P23                | 7.4%  | 7.1  |    |
| 11L | SL_EcoRI0045G19       | 8.0%  | 7.1  |    |
| 11L | SL_EcoRI0027A06       | 12.6% | 7.5  |    |
| 11L | 001N12                | 13.7% | 7.6  | S2 |
| 11L | SL_MboI0047F15        | 14.3% | 7.6  |    |
| 11L | 062E02                | 15.2% | 7.7  |    |
| 11L | SL_EcoRI0031L09       | 16.2% | 7.8  | S3 |
| 11L | Eu/Het border         | 43.0% | 9.9  |    |
| 11L | SL_s0045H10           | 44.4% | 10.1 | S3 |
| 11L | SL_s0084O21           | 45.6% | 10.1 | S5 |
| 11L | Mitochondrial DNA     | 47.3% | 10.3 |    |
| 11L | SL_s0017L16           | 48.1% | 10.3 | S5 |
| 11L | SL_s0105E01           | 50.4% | 10.5 | S6 |
| 11L | 245M17                | 50.7% | 10.6 |    |
| 11L | 158K02                | 51.5% | 10.6 |    |
| 11L | 119D16                | 56.6% | 11.0 |    |
| 11L | 316E10                | 58.3% | 11.2 |    |
| 11L | 249E07                | 66.8% | 11.8 |    |

|            |                        |              |             |           |
|------------|------------------------|--------------|-------------|-----------|
| 11L        | 323E19                 | 88.2%        | 13.6        |           |
| <b>11L</b> | <b>SL_s0014A19</b>     | <b>98.3%</b> | <b>14.4</b> | <b>S6</b> |
| 11L        | Telomere               | 100.0%       | 14.5        |           |
| 12S        | Telomere               | 100.0%       | 0.0         |           |
| <b>12S</b> | <b>SL_Mbol0030P17</b>  | <b>99.3%</b> | <b>0.0</b>  | <b>S1</b> |
| 12S        | 045N22                 | 96.8%        | 0.2         |           |
| 12S        | 026C13                 | 93.7%        | 0.4         |           |
| 12S        | 163O04                 | 82.7%        | 1.2         |           |
| 12S        | 146I19                 | 78.9%        | 1.5         |           |
| 12S        | 049J09                 | 69.3%        | 2.2         |           |
| 12S        | 075A23                 | 67.9%        | 2.3         |           |
| 12S        | 180J10                 | 65.9%        | 2.4         |           |
| 12S        | 206N09                 | 64.7%        | 2.5         |           |
| 12S        | 105C12                 | 56.9%        | 3.1         |           |
| 12S        | 154D06                 | 50.4%        | 3.5         |           |
| 12S        | Eu/Het border          | 40.0%        | 4.3         |           |
| <b>12S</b> | <b>SL_EcoRI0005K14</b> | <b>38.9%</b> | <b>4.3</b>  | <b>S1</b> |
| <b>12S</b> | <b>LE_HBa0016B06</b>   | <b>37.9%</b> | <b>4.4</b>  | <b>S8</b> |
| 12S        | SL_Mbol0050G12         | 36.9%        | 4.5         |           |
| <b>12S</b> | <b>SL_Mbol0038L04</b>  | <b>36.3%</b> | <b>4.5</b>  | <b>S8</b> |
| 12S        | SL_EcoRI0010P04        | 35.8%        | 4.6         |           |
| <b>12S</b> | <b>SL_EcoRI0036O23</b> | <b>35.7%</b> | <b>4.6</b>  | <b>S7</b> |
| <b>12S</b> | <b>SL_EcoRI0003D15</b> | <b>31.1%</b> | <b>4.9</b>  | <b>S7</b> |
| <b>12S</b> | <b>SL_Mbol0008A07</b>  | <b>29.9%</b> | <b>5.0</b>  | <b>S2</b> |

|     |                 |       |      |                  |
|-----|-----------------|-------|------|------------------|
| 12S | 003H12          | 22.2% | 5.5  | S2               |
| 12S | SL_Mbol0023C14  | 21.0% | 5.6  | S6               |
| 12S | SL_EcoRI0004B02 | 18.9% | 5.8  | S6               |
| 12S | SL_Mbol0040D19  | 17.6% | 5.9  | S5               |
| 12S | SL_Mbol0019O03  | 7.7%  | 6.6  | S3               |
| 12S | 005D14          | 7.0%  | 6.6  |                  |
| 12S | SL_EcoRI0001K10 | 4.2%  | 6.8  | S5               |
| 12S | SL_EcoRI0012H19 | 3.4%  | 6.9  |                  |
| 12S | 012P02          | 0.0%  | 7.1  |                  |
|     | Centromere      | 0.0%  | 7.1  |                  |
| 12L | SL_EcoRI0012H19 | 2.2%  | 7.3  | Heinz<br>1706 S5 |
| 12L | 005D14          | 3.7%  | 7.4  | Heinz<br>1706 S3 |
| 12L | 153L10          | 7.4%  | 7.7  |                  |
| 12L | 148K11          | 16.1% | 8.3  |                  |
| 12L | 006G23          | 23.6% | 8.9  |                  |
| 12L | 047D08          | 27.6% | 9.2  |                  |
| 12L | SL_Mbol0009A03  | 29.5% | 9.3  |                  |
| 12L | SL_Mbol0128K09  | 31.6% | 9.5  |                  |
| 12L | 331D02          | 32.1% | 9.5  |                  |
| 12L | 152A18          | 35.4% | 9.8  |                  |
| 12L | Eu/Het border   | 40.0% | 10.1 |                  |
| 12L | SL_Mbol0035N06  | 60.2% | 11.6 | S3               |
| 12L | SL_Mbol0006L17  | 61.0% | 11.7 | S4               |

|            |                        |              |             |            |
|------------|------------------------|--------------|-------------|------------|
| <b>12L</b> | <b>017P17</b>          | <b>65.1%</b> | <b>12.0</b> | <b>S4</b>  |
| 12L        | 079O22                 | 66.6%        | 12.1        |            |
| 12L        | SL_MboI0011A16         | 69.3%        | 12.3        |            |
| <b>12L</b> | <b>SL_EcoRI0031M18</b> | <b>73.1%</b> | <b>12.6</b> | <b>S9</b>  |
| 12L        | 012E19                 | 76.4%        | 12.8        |            |
| <b>12L</b> | <b>SL_EcoRI0024H05</b> | <b>79.0%</b> | <b>13.0</b> | <b>S9</b>  |
| <b>12L</b> | <b>LE_HBa0029L21</b>   | <b>80.6%</b> | <b>13.1</b> | <b>S10</b> |
| 12L        | SL_EcoRI0045D23        | 81.0%        | 13.2        |            |
| 12L        | 326K10                 | 82.4%        | 13.3        |            |
| 12L        | 093P12                 | 87.0%        | 13.6        |            |

|            |                      |              |             |            |
|------------|----------------------|--------------|-------------|------------|
| 12L        | 055G18               | 95.7%        | 14.3        |            |
| 12L        | 116D04               | 97.9%        | 14.4        |            |
| <b>12L</b> | <b>LE_HBa0030J22</b> | <b>98.7%</b> | <b>14.5</b> | <b>S10</b> |
| 12L        | Telomere             | 100.0%       | 14.6        |            |
|            |                      |              |             |            |



**Table S4 FISH-based scaffold order, orientation, size, and chromatin type**

| Chr. | Scaffold Name <sup>1,2</sup> | Scaffold Number <sup>2,3</sup> | Left (head) <sup>4</sup><br>BAC Probe <sup>5</sup> | Right (tail) <sup>4</sup><br>BAC Probe <sup>5</sup> | Scaffold Size (Mb) <sup>6</sup> | SC len. (μm)     | Chromatin Type <sup>11</sup> |
|------|------------------------------|--------------------------------|----------------------------------------------------|-----------------------------------------------------|---------------------------------|------------------|------------------------------|
| 1    | SL2.40sc04133                | 1                              | s090M22                                            | M034D03                                             | 33.0                            | 5.8              | Eu/Het                       |
| 1    | SL2.40sc04191                | 3                              | s053P14                                            | s083L21                                             | 1.7                             | 0.2              | Het                          |
| 1    | SL2.40sc03666                | 2                              | E016I11                                            | H033N15                                             | 2.6                             | 0.2              | Het                          |
| 1    | SL2.40sc03594                | 4                              | s006A13                                            | s042B18                                             | 6.3                             | 0.7              | Het                          |
| 1    | SL2.40sc05010                | 5                              | s042O02                                            | H037N04                                             | 20.5                            | 2.9              | Het/Border                   |
| 1    | SL2.40sc05941                | 6                              | s040G18                                            | E021C24                                             | 6.2                             | 1.7              | Eu/Border                    |
| 1    | SL2.40sc06903                | 8                              | s022L14                                            | s121I01                                             | 2.7                             | 1.1              | Eu                           |
| 1    | SL2.40sc06917                | 7                              | s071P10                                            | n/a <sup>7</sup>                                    | 0.4                             | n/a              | Eu                           |
| 1    | SL2.40sc04323                | 9                              | s024J19                                            | M028C09                                             | 17.0                            | 12.6             | Eu                           |
| 2    | SL2.40sc04732                | 4                              | E007F19                                            | E008B15                                             | 1.7                             | 0.2              | Het                          |
| 2    | SL2.40sc04208                | 6                              | s053E24                                            | s044P10                                             | 1.4                             | 0.2              | Het                          |
| 2    | SL2.40sc05776                | 5                              | H011G24                                            | M036C03                                             | 2.1                             | 0.5              | Het                          |
| 2    | SL2.40sc06593                | 1                              | s056I16                                            | s079J24                                             | 4.0                             | 0.5              | Het                          |
| 2    | SL2.40sc04142                | 2                              | s053C07                                            | s050E09                                             | 6.5                             | 1.5              | Het/Cent                     |
| 2    | SL2.40sc03766                | 3                              | M021A03                                            | E034J17                                             | 11.7                            | 2.5              | Het/Border                   |
| 2    | SL2.40sc03665                | 7                              | s101F18                                            | M017J13                                             | 22.4                            | 15.3             | Eu                           |
| 3    | SL2.40sc04439                | 1                              | s009C01                                            | s086D22                                             | 2.5                             | 1.4              | Eu                           |
| 3    | SL2.40sc04696                | 4                              | s018K15                                            | s002G24                                             | 1.3                             | 0.5              | Eu                           |
| 3    | SL2.40sc05330                | 5                              | s050E05                                            | H037B06                                             | 2.6                             | 0.9              | Eu/Border                    |
| 3    | SL2.40sc04126                | 6                              | H020G20                                            | H039C15                                             | 6.5                             | 0.9              | Het/Border                   |
| 3    | SL2.40sc04616                | 9                              | M079O10                                            | M002J15                                             | 3.1                             | 0.6              | Cent/Het                     |
| 3    | SL2.40sc06725                | 7                              | H244B01                                            | E121G21                                             | 3.0                             | 0.3              | Het                          |
| 3    | SL2.40sc04704                | 8                              | H027L13                                            | s071G06                                             | 18.6                            | 2.2 <sup>8</sup> | Het                          |
| 3    | SL2.40sc03721                | 12                             | E018K21                                            | H028L03                                             | 1.1                             | 0.0 <sup>8</sup> | Het/Border                   |
| 3    | SL2.40sc04822                | 2                              | s042B23                                            | H030A19                                             | 4.1                             | 0.5 <sup>8</sup> | Het/Border                   |
| 3    | SL2.40sc03806                | 10                             | H011C02                                            | H001H05                                             | 5.5                             | 1.8 <sup>8</sup> | Border/Eu                    |
| 3    | SL2.40sc03796                | 11                             | M003H09                                            | E031G05                                             | 7.0                             | 2.4              | Eu                           |
| 3    | SL2.40sc06911                | 3                              | M015G06                                            | s048H23                                             | 0.4                             | 0.0              | Eu                           |
| 3    | SL2.40sc03701                | 13                             | E006F17                                            | E034G21                                             | 9.2                             | 6.2              | Eu                           |
| 4    | SL2.40sc03604                | 1                              | M035I14                                            | H012B20                                             | 11.6                            | 4.2              | Eu/Het                       |
| 4    | SL2.40sc05339                | 3                              | E036C15                                            | H018I03                                             | 2.0                             | 0.6              | Het/Cent                     |
| 4    | SL2.40sc03683                | 2                              | M036H17                                            | M016J15                                             | 17.6                            | 2.5              | Cent/Het                     |
| 4    | SL2.40sc06101                | 4                              | M038M16                                            | M029O16                                             | 23.3                            | 4.6              | Het/Eu                       |
| 4    | SL2.40sc04680                | 5                              | H013P02                                            | M018D12                                             | 0.8                             | 0.4              | Eu                           |

|    |               |    |         |                  |                  |     |             |
|----|---------------|----|---------|------------------|------------------|-----|-------------|
| 4  | SL2.40sc04135 | 6  | H020C13 | M023M21          | 8.8              | 5.2 | Eu          |
| 5  | SL2.40sc03726 | 1  | s094J05 | H002J04          | 42.1             | 9.1 | Eu/Het/Cent |
| 5  | SL2.40sc06155 | 2  | s031L05 | s084H11          | 4.3              | 0.2 | Het         |
| 5  | SL2.40sc03902 | 3  | H016D20 | E004N07          | 18.6             | 4.9 | Eu/Het      |
| 6  | SL2.40sc04474 | 1  | M032G6  | H028K02          | 8.6              | 2.3 | Eu/Het      |
| 6  | SL2.40sc06140 | 3  | H025N04 | M029F23          | 0.7              | 0.1 | Het         |
| 6  | SL2.40sc05383 | 2  | E040C12 | E013C07          | 6.1              | 1.3 | Het/Cent    |
| 6  | SL2.40sc04279 | 4  | M029C07 | E009J17          | 9.6              | 1.6 | Het         |
| 6  | SL2.40sc05188 | 5  | E033O20 | H031J01          | 2.4              | 0.2 | Border      |
| 6  | SL2.40sc05732 | 6  | M034N10 | E023E10          | 6.6              | 2.4 | Border/Eu   |
| 6  | SL2.40sc05054 | 7  | E018M04 | E008B16          | 10.3             | 6.2 | Eu          |
| 6  | SL2.40sc03622 | 8  | H025F06 | E019F04          | 1.8              | 1.2 | Eu          |
| 7  | SL2.40sc03731 | 1  | E006L14 | M016H01          | 33.3             | 6.5 | Eu/Het/Cent |
| 7  | SL2.40sc05397 | 2  | H032J14 | E016C19          | 8.0              | 0.9 | Het         |
| 7  | SL2.40sc03685 | 3  | H001O15 | E032D11          | 20.7             | 5.7 | Het/Eu      |
| 7  | SL2.40sc04626 | 4  | H024C01 | M017L19          | 3.4              | 2.0 | Eu          |
| 8  | SL2.40sc04813 | 1  | H030O09 | H008J16          | 3.0              | 1.5 | Eu          |
| 8  | SL2.40sc03770 | 2  | H015E06 | H009K19          | 6.3              | 1.2 | Eu/Border   |
| 8  | SL2.40sc04167 | 7  | M012I24 | n/a <sup>7</sup> | 0.2              | n/a | Het         |
| 8  | SL2.40sc03749 | 5  | s093G06 | s030B23          | 1.5              | 0.2 | Het         |
| 8  | SL2.40sc04236 | 6  | s105O13 | M005G10          | 14.6             | 2.2 | Het/Cent    |
| 8  | SL2.40sc03835 | 3  | s078C24 | s058J24          | 8.4              | 1.1 | Het         |
| 8  | SL2.40sc04701 | 4  | E024O12 | M019D14          | 7.0              | 0.7 | Het         |
| 8  | SL2.40sc04948 | 8  | H033A16 | M007C12          | 14.4             | 3.8 | Eu/Het      |
| 8  | SL2.40sc03923 | 9  | s082B11 | E040H01          | 7.5              | 4.6 | Eu          |
| 9  | SL2.40sc03771 | 1  | M032A02 | M025N23          | 19.2             | 5.2 | Eu/Het      |
| 9  | SL2.40sc04008 | 4  | E015A15 | E025E12          | 5.2              | 0.9 | Het/Cent    |
| 9  | SL2.40sc04950 | 3  | E018E08 | M005G01          | 5.8              | 0.5 | Het         |
| 9  | SL2.40sc04785 | 5  | M013P10 | E022O16          | 2.0              | 0.0 | Het         |
| 9  | SL2.40sc04777 | 6  | M018I03 | H005M15          | 28.2             | 4.7 | Eu/Het      |
| 9  | SL2.40sc06916 | 2  | F051C04 | n/a <sup>7</sup> | 0.0 <sup>9</sup> | n/a | Eu          |
| 9  | SL2.40sc05269 | 7  | M019G06 | M020M04          | 2.7              | 1.0 | Eu          |
| 9  | SL2.40sc03852 | 8  | M025N11 | H010F04          | 1.3              | 0.4 | Eu          |
| 9  | SL2.40sc04828 | 9  | H001I06 | E024O21          | 2.5              | 0.9 | Eu          |
| 9  | SL2.40sc06214 | 10 | M037I08 | M022L14          | 0.6              | 0.4 | Eu          |
| 10 | SL2.40sc05925 | 1  | E027L04 | E009D07          | 5.4              | 2.2 | Eu/Border   |
| 10 | SL2.40sc03798 | 2  | H023E16 | s071N16          | 16.5             | 1.9 | Het         |
| 10 | SL2.40sc04872 | 4  | E029F05 | M011N01          | 3.9              | 1.1 | Cent        |
| 10 | SL2.40sc05632 | 3  | s042K13 | s121P17          | 31.1             | 4.7 | Eu/Het      |

|        |                             |    |         |                  |       |       |            |
|--------|-----------------------------|----|---------|------------------|-------|-------|------------|
| 10     | SL2.40sc04534               | 5  | F014E24 | n/a <sup>7</sup> | 0.1   | n/a   | Eu         |
| 10     | SL2.40sc04199               | 6  | E036N16 | E008A07          | 8.0   | 4.5   | Eu         |
| 11     | SL2.40sc03748               | 1  | s029B21 | E018D15          | 15.2  | 5.2   | Eu/Het     |
| 11     | SL2.40sc06763               | 4  | H008F06 | H004F15          | 2.5   | 0.3   | Het        |
| 11     | SL2.40sc04054               | 2  | s082L15 | H001N12          | 8.0   | 1.8   | Het/Cent   |
| 11     | SL2.40sc03752               | 3  | E031L09 | s045H10          | 17.4  | 2.3   | Het/Border |
| 11     | SL2.40sc06137               | 5  | s084O21 | s017L16          | 2.1   | 0.2   | Border     |
| 11     | SL2.40sc03876               | 6  | s105E01 | s014A19          | 8.2   | 3.8   | Eu         |
| 12     | SL2.40sc04607               | 1  | M030P17 | E005K14          | 16.1  | 4.3   | Eu/Border  |
| 12     | SL2.40sc06147               | 8  | H016B06 | M038L04          | 1.2   | 0.1   | Border     |
| 12     | SL2.40sc04039               | 7  | E036O23 | E003D15          | 4.9   | 0.3   | Border     |
| 12     | SL2.40sc04878               | 2  | M008A07 | H003H12          | 5.7   | 0.5   | Het        |
| 12     | SL2.40sc04266               | 6  | M023C14 | E004B02          | 1.3   | 0.1   | Het        |
| 12     | SL2.40sc04757 <sup>10</sup> | 5  | M040D19 | E012H19          | 5.8   | 1.4   | Het/Cent   |
| 12     | SL2.40sc04057               | 3  | H005D14 | M035N06          | 25.2  | 4.2   | Eu/Het     |
| 12     | SL2.40sc04915               | 4  | M006L17 | H017P17          | 1.6   | 0.3   | Eu         |
| 12     | SL2.40sc05611               | 9  | E031M18 | E024H05          | 1.2   | 0.4   | Eu         |
| 12     | SL2.40sc05380               | 10 | H029L21 | E030J22          | 2.6   | 1.4   | Eu         |
| Total: |                             |    |         |                  | 760.0 | 196.7 |            |

<sup>1</sup> [http://solgenomics.net/cview/map.pl?map\\_id=agg](http://solgenomics.net/cview/map.pl?map_id=agg)

<sup>2</sup> FISH-based scaffolds are color coded with reference to a comparison with their order and orientation determined using the Kazusa EXPEN 2000 linkage map. Scaffold names and numbers that are unchanged by FISH are shown with black lettering on a white background. Changed scaffolds are shown with white lettering on a red background (order only), white lettering on a blue background (orientation only), and white lettering on a purple background (both order and orientation).

<sup>3</sup> Scaffold number is determined by scaffold order from head to tail in the pseudomolecules based on the linkage map.

<sup>4</sup> Left and right refer to the probe orientation when the chromosomes are diagrammed with the telomere of the short arm on the left (= head) and the telomere of the long arm on the right (= tail).

<sup>5</sup> BAC library names have been abbreviated. H=HindIII, E=EcoRI, M=MboI, s=sheared, F=Fosmid

<sup>6</sup> The Tomato Genome Consortium, 2012 The tomato genome sequence provides insights into fleshy fruit evolution. Nature 485: 635-641; <http://solgenomics.net>

<sup>7</sup> Not applicable because only one BAC/fosmid was localized in this small scaffold.

<sup>8</sup> SC length determinations are relatively inaccurate in and near scaffolds 12 and 2.

<sup>9</sup> The actual length of this scaffold is 17.6 Kb so it is rounded to 0.0 Mb.

<sup>10</sup> Scaffold SL2.40sc04757 was ordered and oriented in Heinz 1706 because this scaffold was involved in an inversion around the kinetochore of Cherry Tomato LA4444.

11 Eu = euchromatin; Het = heterochromatin; cent = centromere/kinetochore; Border (transition between euchromatin and heterochromatin); Eu/Het includes euchromatin, heterochromatin, and the border between Eu and Het; Het/Cent includes heterochromatin and centromere; Border/Eu includes euchromatin and border with heterochromatin; Eu/Het/Cent includes euchromatin, the border with heterochromatin, heterochromatin and centromeres.

**Table S5 Comparison of scaffold order and orientation based on linkage, optical mapping, and FISH**

| Chromosome | Scaffold No. <sup>1</sup> | Scaffold Name <sup>2</sup> | Mb Length | Scaffold Order According to: |                                         |                   |
|------------|---------------------------|----------------------------|-----------|------------------------------|-----------------------------------------|-------------------|
|            |                           |                            |           | Linkage                      | Optical Superscaffold (OS) <sup>3</sup> | FISH <sup>4</sup> |
| 1          | 1                         | SL2.40sc04133              | 33.0      | 1                            |                                         | 1                 |
| 1          | 2                         | SL2.40sc03666              | 1.7       | 2                            |                                         | 3                 |
| 1          | 3                         | SL2.40sc04191              | 2.6       | 3                            | 2                                       | 2*                |
| 1          | 4                         | SL2.40sc03594              | 6.3       | 4                            | 4                                       | 4                 |
| 1          | 5                         | SL2.40sc05010              | 20.5      | 5                            | 5                                       | 5                 |
| 1          | 6                         | SL2.40sc05941              | 6.2       | 6                            | 6                                       | 6                 |
| 1          | 7                         | SL2.40sc06903              | 2.7       | 7                            | 8                                       | 8                 |
| 1          | 8                         | SL2.40sc06917              | 0.4       | 8                            | 7                                       | 7                 |
| 1          | 9                         | SL2.40sc04323              | 17.0      | 9                            |                                         | 9                 |
| 2          | 1                         | SL2.40sc06593              | 1.7       | 1                            | 4                                       | 4*                |
| 2          | 2                         | SL2.40sc04142              | 1.4       | 2                            | 6                                       | 6*                |
| 2          | 3                         | SL2.40sc03766              | 2.1       | 3                            |                                         | 5                 |
| 2          | 4                         | SL2.40sc04732              | 4.0       | 4                            |                                         | 1                 |
| 2          | 5                         | SL2.40sc05776              | 6.5       | 5                            |                                         | 2                 |
| 2          | 6                         | SL2.40sc04208              | 11.7      | 6                            |                                         | 3                 |
| 2          | 7                         | SL2.40sc03665              | 22.4      | 7                            |                                         | 7                 |
| 3          | 1                         | SL2.40sc04439              | 2.5       | 1                            |                                         | 1                 |
| 3          | 2                         | SL2.40sc04822              | 1.3       | 2                            |                                         | 4                 |
| 3          | 3                         | SL2.40sc06911              | 2.6       | 3                            |                                         | 5                 |
| 3          | 4                         | SL2.40sc04696              | 6.5       | 4                            |                                         | 6                 |
| 3          | 5                         | SL2.40sc05330              | 3.1       | 5                            |                                         | 9                 |
| 3          | 6                         | SL2.40sc04126              | 3.0       | 6                            |                                         | 7                 |
| 3          | 7                         | SL2.40sc06725              | 18.6      | 7                            |                                         | 8                 |
| 3          | 8                         | SL2.40sc04704              | 4.1       | 8                            |                                         | 2*                |
| 3          | 9                         | SL2.40sc04616              | 1.1       | 9                            |                                         | 12                |
| 3          | 10                        | SL2.40sc03806              | 5.5       | 10                           |                                         | 10                |
| 3          | 11                        | SL2.40sc03796              | 7.0       | 11                           |                                         | 11                |
| 3          | 12                        | SL2.40sc03721              | 0.4       | 12                           | 3                                       | 3*                |
| 3          | 13                        | SL2.40sc03701              | 9.2       | 13                           | 13                                      | 13                |
| 4          | 1                         | SL2.40sc03604              | 11.6      | 1                            |                                         | 1                 |
| 4          | 2                         | SL2.40sc03683              | 2.0       | 2                            |                                         | 3*                |
| 4          | 3                         | SL2.40sc05339              | 17.6      | 3                            |                                         | 2*                |
| 4          | 4                         | SL2.40sc06101              | 23.3      | 4                            |                                         | 4                 |

|    |    |               |      |    |    |    |
|----|----|---------------|------|----|----|----|
| 4  | 5  | SL2.40sc04680 | 0.8  | 5  |    | 5  |
| 4  | 6  | SL2.40sc04135 | 8.8  | 6  |    | 6  |
| 5  | 1  | SL2.40sc03726 | 42.1 | 1  |    | 1  |
| 5  | 2  | SL2.40sc06155 | 4.3  | 2  |    | 2* |
| 5  | 3  | SL2.40sc03902 | 18.6 | 3  |    | 3  |
| 6  | 1  | SL2.40sc04474 | 8.6  | 1  |    | 1  |
| 6  | 2  | SL2.40sc05383 | 0.7  | 2  |    | 3* |
| 6  | 3  | SL2.40sc06140 | 6.1  | 3  |    | 2  |
| 6  | 4  | SL2.40sc04279 | 9.6  | 4  |    | 4  |
| 6  | 5  | SL2.40sc05188 | 2.4  | 5  | 5  | 5* |
| 6  | 6  | SL2.40sc05732 | 6.6  | 6  | 6  | 6  |
| 6  | 7  | SL2.40sc05054 | 10.3 | 7  | 7  | 7  |
| 6  | 8  | SL2.40sc03622 | 1.8  | 8  | 8  | 8  |
| 7  | 1  | SL2.40sc03731 | 33.3 | 1  | 1  | 1  |
| 7  | 2  | SL2.40sc05397 | 8.0  | 2  | 2  | 2  |
| 7  | 3  | SL2.40sc03685 | 20.7 | 3  |    | 3  |
| 7  | 4  | SL2.40sc04626 | 3.4  | 4  |    | 4  |
| 8  | 1  | SL2.40sc04813 | 3.0  | 1  | 1  | 1  |
| 8  | 2  | SL2.40sc03770 | 6.3  | 2  | 2  | 2  |
| 8  | 3  | SL2.40sc03835 | 0.2  | 3  |    | 7  |
| 8  | 4  | SL2.40sc04701 | 1.5  | 4  | 5  | 5* |
| 8  | 5  | SL2.40sc03749 | 14.6 | 5  | 6  | 6* |
| 8  | 6  | SL2.40sc04236 | 8.4  | 6  | 3  | 3* |
| 8  | 7  | SL2.40sc04167 | 7.0  | 7  | 4  | 4* |
| 8  | 8  | SL2.40sc04948 | 14.4 | 8  |    | 8  |
| 8  | 9  | SL2.40sc03923 | 7.5  | 9  |    | 9  |
| 9  | 1  | SL2.40sc03771 | 19.2 | 1  |    | 1  |
| 9  | 2  | SL2.40sc06916 | 0.0  | 2  | 4  | 4  |
| 9  | 3  | SL2.40sc04950 | 5.2  | 3  | 3  | 3* |
| 9  | 4  | SL2.40sc04008 | 5.8  | 4  | 5  | 5  |
| 9  | 5  | SL2.40sc04785 | 2.0  | 5  | 6  | 6  |
| 9  | 6  | SL2.40sc04777 | 28.2 | 6  |    | 2  |
| 9  | 7  | SL2.40sc05269 | 2.7  | 7  |    | 7  |
| 9  | 8  | SL2.40sc03852 | 1.3  | 8  | 8  | 8  |
| 9  | 9  | SL2.40sc04828 | 2.5  | 9  | 9  | 9  |
| 9  | 10 | SL2.40sc06214 | 0.6  | 10 | 10 | 10 |
| 10 | 1  | SL2.40sc05925 | 5.4  | 1  | 1  | 1  |
| 10 | 2  | SL2.40sc03798 | 16.5 | 2  | 2  | 2  |
| 10 | 3  | SL2.40sc05632 | 3.9  | 3  |    | 4  |

|              |    |               |       |    |    |       |    |
|--------------|----|---------------|-------|----|----|-------|----|
| 10           | 4  | SL2.40sc04872 | 31.1  | 4  |    |       | 3  |
| 10           | 5  | SL2.40sc04534 | 0.1   | 5  |    |       | 5  |
| 10           | 6  | SL2.40sc04199 | 8.0   | 6  |    |       | 6  |
| 11           | 1  | SL2.40sc03748 | 15.2  | 1  |    |       | 1  |
| 11           | 2  | SL2.40sc04054 | 2.5   | 2  |    |       | 4  |
| 11           | 3  | SL2.40sc03752 | 8.0   | 3  |    |       | 2  |
| 11           | 4  | SL2.40sc06763 | 17.4  | 4  |    |       | 3* |
| 11           | 5  | SL2.40sc06137 | 2.1   | 5  | 5  | OS 12 | 5  |
| 11           | 6  | SL2.40sc03876 | 8.2   | 6  | 6  |       | 6  |
| 12           | 1  | SL2.40sc04607 | 16.1  | 1  |    |       | 1  |
| 12           | 2  | SL2.40sc04878 | 1.2   | 2  |    |       | 8  |
| 12           | 3  | SL2.40sc04057 | 4.9   | 3  |    |       | 7* |
| 12           | 4  | SL2.40sc04915 | 5.7   | 4  |    |       | 2  |
| 12           | 5  | SL2.40sc04757 | 1.3   | 5  |    |       | 6  |
| 12           | 6  | SL2.40sc04266 | 5.8   | 6  | 5  | OS 13 | 5  |
| 12           | 7  | SL2.40sc04039 | 25.2  | 7  | 3  |       | 3  |
| 12           | 8  | SL2.40sc06147 | 1.6   | 8  | 4  |       | 4  |
| 12           | 9  | SL2.40sc05611 | 1.2   | 9  | 9  | OS 14 | 9  |
| 12           | 10 | SL2.40sc05380 | 2.6   | 10 | 10 |       | 10 |
| <b>Total</b> |    |               | 760.0 |    |    |       |    |

<sup>1</sup>Scaffolds are numbered according to their order determined using the tomato Kazusa EXPEN 2000 linkage map at [http://solgenomics.net/cview/map.pl?map\\_version\\_id=103](http://solgenomics.net/cview/map.pl?map_version_id=103)

<sup>2</sup>[http://solgenomics.net/cview/map.pl?map\\_id=agp](http://solgenomics.net/cview/map.pl?map_id=agp)

<sup>3</sup>Optical superscaffolds consist of 2-4 sequenced scaffolds ordered and oriented by optical mapping. Scaffold numbers refer to column 2. Empty spaces indicate scaffolds that were not ordered and oriented by optical mapping. Green scaffolds are in the same order and orientation as that determined by the linkage map. Red scaffolds are in the same orientation but different order, blue scaffolds are in the same order but different orientation, and purple scaffolds are in a different order and orientation than that determined by the linkage map.

<sup>4</sup>Order and orientation of scaffolds determined by FISH. Scaffold numbers refer to column 2. Green scaffolds are in the same order and orientation by both optical mapping and by FISH.

\*Denotes scaffolds with a different orientation by FISH than that determined by the linkage map.

**Table S6 Estimating the linear density of DNA in euchromatin, heterochromatin, and kinetochores by FISH<sup>1</sup>**

| Chromatin Type  | Chr. # | Scaffold #    | Scaffold Size                  |                                     | Mb/ $\mu\text{m}$                         |
|-----------------|--------|---------------|--------------------------------|-------------------------------------|-------------------------------------------|
|                 |        |               | Mb (Corrected Mb) <sup>2</sup> | SC Length - $\mu\text{m}$           |                                           |
| Euchromatin     | 1      | SL2.40sc04323 | 17.0 (16.8)                    | 12.6                                | 1.33                                      |
|                 | 2      | SL2.40sc03665 | 22.4 (21.8)                    | 15.3                                | 1.43                                      |
|                 | 3      | SL2.40sc04439 | 2.5 (2.3)                      | 1.4                                 | 1.62                                      |
|                 | 3      | SL2.40sc03701 | 9.2 (8.7)                      | 6.2                                 | 1.40                                      |
|                 | 4      | SL2.40sc04135 | 8.8 (8.6)                      | 5.2                                 | 1.65                                      |
|                 | 6      | SL2.40sc05054 | 10.3 (9.8)                     | 6.2                                 | 1.58                                      |
|                 | 6      | SL2.40sc03622 | 1.8 (1.7)                      | 1.2                                 | 1.38                                      |
|                 | 7      | SL2.40sc04626 | 3.4 (3.2)                      | 2.0                                 | 1.58                                      |
|                 | 8      | SL2.40sc03923 | 7.5 (7.4)                      | 4.6                                 | 1.60                                      |
|                 | 10     | SL2.40sc04199 | 8.0 (7.7)                      | 4.5                                 | 1.70                                      |
|                 | 11     | SL2.40sc03876 | 8.2 (7.9)                      | 3.8                                 | 2.07                                      |
|                 | 12     | SL2.40sc05380 | 2.6 (2.3)                      | 1.4                                 | 1.66                                      |
|                 |        | <b>Total</b>  |                                | <b>101.7 (98.0) Mb</b>              | <b>64.4 <math>\mu\text{m}</math></b>      |
| Heterochromatin | 1      | SL2.40sc03594 | 6.3 (5.9)                      | 0.7                                 | 8.41                                      |
|                 | 7      | SL2.40sc05397 | 8.0 (7.8)                      | 0.9                                 | 8.69                                      |
|                 | 8      | SL2.40sc04701 | 7.0 (6.8)                      | 0.7                                 | 9.76                                      |
|                 | 10     | SL2.40sc03798 | 16.5 (16.3)                    | 1.9                                 | 8.58                                      |
|                 |        | <b>Total</b>  |                                | <b>37.8 (36.8) Mb</b>               | <b>4.2 <math>\mu\text{m}</math></b>       |
| Kinetochores    | 10     | SL2.40sc04872 | 3.9 (3.6)                      | 1.1                                 | 3.27                                      |
|                 |        | <b>Total</b>  |                                | <b>1.1 <math>\mu\text{m}</math></b> | <b>3.27 Mb/<math>\mu\text{m}^3</math></b> |

<sup>1</sup>Scaffold numbers, DNA amounts in scaffolds, lengths of scaffolds, and chromatin types were extracted from Table S1.

<sup>2</sup>The FISH signals at either end of a scaffold are not at the very ends of the scaffold but somewhat into the scaffold [see File S1, Additional Materials and Methods- Determining the amount of DNA per micrometer of SC (= linear DNA density) in kinetochores, euchromatin, and heterochromatin]. Because of this, scaffold DNA extending beyond the FISH signals must be subtracted from the length of the scaffold to yield the "Corrected Mb" between FISH signals that will be divided by SC length in micrometers to yield Mb/ $\mu\text{m}$ .

<sup>3</sup> = Total (corrected) Mb DNA  $\div$  total SC length ( $\mu\text{m}$ )

**Table S7** Gap sizes between scaffolds determined using BAC-FISH

| Chr. | Gap between Scaffold A and Scaffold B <sup>1</sup> | BAC Probe for Tail of Scaffold A <sup>2</sup> | BAC Probe for Head of Scaffold B <sup>2</sup> | Chromatin Type <sup>3</sup> | DNA Mb per $\mu\text{m}$ | Gap Size SC length ( $\mu\text{m}$ ) | Distance between BACs (Mb) | Corrected Gap Size Mb estimate <sup>4</sup> |
|------|----------------------------------------------------|-----------------------------------------------|-----------------------------------------------|-----------------------------|--------------------------|--------------------------------------|----------------------------|---------------------------------------------|
| 1    | 1-3                                                | M034D03                                       | s053P14                                       | Het                         | 8.8                      | 0.3                                  | 2.6                        | 2.4                                         |
| 1    | 3-2                                                | s083L21                                       | E016I11                                       | Cent                        | 3.3                      | 0.7                                  | 2.2                        | 1.9                                         |
| 1    | 2-4                                                | H033N15                                       | s006A13                                       | Het                         | 8.8                      | 0.1                                  | 0.9                        | 0.6                                         |
| 1    | 4-5                                                | s042B18                                       | s042O02                                       | Het                         | 8.8                      | 0.3                                  | 2.6                        | 2.2                                         |
| 1    | 5-6                                                | H037N04                                       | s040G18                                       | Border                      | 5.1                      | 0.1                                  | 0.5                        | 0.3                                         |
| 1    | 6-8                                                | E021C24                                       | s022L14                                       | Border                      | 5.1                      | 0.1                                  | 0.5                        | 0.3                                         |
| 1    | 8-7                                                | s121I01                                       | s071P10                                       | Eu                          | 1.5                      | 0.3                                  | 0.5                        | 0.2                                         |
| 1    | 7-9                                                | s071P10                                       | s024J19                                       | Eu                          | 1.5                      | 0.3                                  | 0.5                        | 0.2                                         |
| 2    | 4-6                                                | E008B15                                       | s053E24                                       | Het                         | 8.8                      | 0.1                                  | 0.7                        | 0.4                                         |
| 2    | 6-5                                                | s044P10                                       | H011G24                                       | Het                         | 8.8                      | 0.0                                  | 0.2                        | 0.0                                         |
| 2    | 5-1                                                | M036C03                                       | s056I16                                       | Het                         | 8.8                      | 0.0                                  | 0.1                        | 0.0                                         |
| 2    | 1-2                                                | s079J24                                       | s053C07                                       | Het                         | 8.8                      | 0.5                                  | 4.1                        | 3.2                                         |
| 2    | 2-3                                                | s050E09                                       | M021A03                                       | Het                         | 8.8                      | 0.1                                  | 1.0                        | 0.5                                         |
| 2    | 3-7                                                | E034J17                                       | s101F18                                       | Border                      | 5.1                      | 0.4                                  | 1.9                        | 1.4                                         |
| 3    | 1-4                                                | s086D22                                       | s018K15                                       | Eu                          | 1.5                      | 0.2                                  | 0.4                        | 0.1                                         |
| 3    | 4-5                                                | s002G24                                       | s050E05                                       | Eu                          | 1.5                      | 0.1                                  | 0.2                        | 0.0                                         |
| 3    | 5-6                                                | H037B06                                       | H020G20                                       | Border                      | 5.1                      | 0.2                                  | 1.1                        | 0.3                                         |
| 3    | 6-9                                                | H039C15                                       | M079O10                                       | Het/Cent                    | 8.8                      | 0.6                                  | 5.0                        | 4.7                                         |
| 3    | 9-7                                                | M002J15                                       | H244B01                                       | Het                         | 8.8                      | 0.1                                  | 0.6                        | 0.2                                         |
| 3    | 7-8                                                | E121G21                                       | H027L13                                       | Het                         | 8.8                      | 0.1                                  | 1.2                        | 0.8                                         |
| 3    | 8-12                                               | s071G06                                       | E018K21                                       | Het                         | 8.8                      | 0.0                                  | 0.3                        | 0.2 <sup>5</sup>                            |
| 3    | 12-2                                               | H028L03                                       | s042B23                                       | Het                         | 8.8                      | 0.0                                  | 0.3                        | 0.0 <sup>5</sup>                            |
| 3    | 2-10                                               | H030A19                                       | H011C02                                       | Border                      | 5.1                      | 0.2                                  | 0.8                        | 0.6 <sup>5</sup>                            |
| 3    | 10-11                                              | H001H05                                       | M003H09                                       | Eu                          | 1.5                      | 0.2                                  | 0.3                        | 0.0                                         |
| 3    | 11-3                                               | E031G05                                       | M015G06                                       | Eu                          | 1.5                      | 0.4                                  | 0.6                        | 0.1                                         |
| 3    | 3-13                                               | s048H23                                       | E006F17                                       | Eu                          | 1.5                      | 0.3                                  | 0.4                        | 0.1                                         |
| 4    | 1-3                                                | H012B20                                       | E036C15                                       | Het                         | 8.8                      | 0.06                                 | 0.5                        | 0.3                                         |
| 4    | 3-2                                                | H018I03                                       | M036H17                                       | Cent                        | 3.3                      | 0.2                                  | 0.6                        | 0.4                                         |
| 4    | 2-4                                                | M016J15                                       | M038M16                                       | Het                         | 8.8                      | 0.03                                 | 0.2                        | 0.1                                         |
| 4    | 4-5                                                | M029O16                                       | H013P02                                       | Eu                          | 1.5                      | 0.04                                 | 0.1                        | 0.0                                         |
| 4    | 5-6                                                | M018D12                                       | H020C13                                       | Chrom                       | 8.8                      | 0.2                                  | 1.9                        | 1.6                                         |
| 5    | 1-2                                                | H002J04                                       | s031L05                                       | Het                         | 8.8                      | 0.1                                  | 1.1                        | 0.9                                         |
| 5    | 2-3                                                | s084H11                                       | H016D20                                       | Het                         | 8.8                      | 0.1                                  | 1.1                        | 0.8                                         |



|    |      |         |         |        |     |      |     |      |
|----|------|---------|---------|--------|-----|------|-----|------|
| 6  | 1-3  | H028K02 | H025N04 | Het    | 8.8 | 0.3  | 2.8 | 2.4  |
| 6  | 3-2  | M029F23 | E040C12 | Het    | 8.8 | 0.1  | 0.8 | 0.6  |
| 6  | 2-4  | E013C07 | M029C07 | Het    | 8.8 | 0.1  | 0.6 | 0.4  |
| 6  | 4-5  | E009J17 | E033O20 | Border | 5.1 | 0.0  | 0.1 | 0.0  |
| 6  | 5-6  | H031J01 | M034N10 | Border | 5.1 | 0.0  | 0.1 | 0.0  |
| 6  | 6-7  | E023E10 | E018M04 | Eu     | 1.5 | 0.3  | 0.4 | 0.0  |
| 6  | 7-8  | E008B16 | H025F06 | Eu     | 1.5 | 0.2  | 0.3 | 0.0  |
| 7  | 1-2  | M016H01 | H032J14 | Het    | 8.8 | 0.06 | 0.5 | 0.4  |
| 7  | 2-3  | E016C19 | H001O15 | Het    | 8.8 | 0.3  | 2.5 | 2.4  |
| 7  | 3-4  | H024C01 | E032D11 | Eu     | 1.5 | 0.13 | 0.2 | 0.0  |
| 8  | 1-2  | H008J16 | H015E06 | Eu     | 1.5 | 0.3  | 0.4 | 0.0  |
| 8  | 2-7  | H009K19 | M012I24 | Border | 5.1 | 0.2  | 0.8 | 0.5  |
| 8  | 7-5  | M012I24 | s093G06 | Border | 5.1 | 0.1  | 0.6 | 0.3  |
| 8  | 5-6  | s030B23 | s105O13 | Border | 5.1 | 0.04 | 0.2 | 0.0  |
| 8  | 6-3  | M005G10 | s078C24 | Het    | 8.8 | 0.04 | 0.3 | 0.05 |
| 8  | 3-4  | s058J24 | E024O12 | Het    | 8.8 | 0.1  | 1.2 | 1.0  |
| 8  | 4-8  | M019D14 | H033A16 | Het    | 8.8 | 0.2  | 1.4 | 0.8  |
| 8  | 8-9  | M007C12 | s082B11 | Eu     | 1.5 | 0.2  | 0.3 | 0.0  |
| 9  | 1-4  | M025N23 | E015A15 | Het    | 8.8 | 0.2  | 1.7 | 1.5  |
| 9  | 4-3  | E025E12 | E018E08 | Het    | 8.8 | 0.1  | 0.9 | 0.8  |
| 9  | 3-5  | M005G01 | M013P10 | Het    | 8.8 | 0.2  | 1.4 | 1.1  |
| 9  | 5-6  | E022O16 | M018I03 | Het    | 8.8 | 0.2  | 1.4 | 1.3  |
| 9  | 6-2  | H005M15 | F051C04 | Eu     | 1.5 | 0.2  | 0.3 | 0.0  |
| 9  | 2-7  | F051C04 | M019G06 | Eu     | 1.5 | 0.1  | 0.1 | 0.0  |
| 9  | 7-8  | M020M04 | M025N11 | Eu     | 1.5 | 0.4  | 0.5 | 0.0  |
| 9  | 8-9  | H010F04 | H001I06 | Eu     | 1.5 | 0.1  | 0.2 | 0.0  |
| 9  | 9-10 | E024O21 | M037I08 | Eu     | 1.5 | 0.4  | 0.5 | 0.1  |
| 10 | 1-2  | E009D07 | H023E16 | Border | 5.1 | 0.02 | 0.1 | 0.0  |
| 10 | 2-4  | s071N16 | E029F05 | Het    | 8.8 | 0.1  | 0.7 | 0.4  |
| 10 | 4-3  | M011N01 | s042K13 | Het    | 8.8 | 0.02 | 0.2 | 0.0  |
| 10 | 3-5  | s121P17 | F014E24 | Eu     | 1.5 | 0.13 | 0.2 | 0.1  |
| 10 | 5-6  | F014E24 | E036N16 | Eu     | 1.5 | 0.10 | 0.2 | 0.0  |
| 11 | 1-4  | E018D15 | H008F06 | Het    | 8.8 | 0.1  | 0.7 | 0.4  |
| 11 | 4-2  | H004F15 | s082L15 | Het    | 8.8 | 0.1  | 0.9 | 0.6  |
| 11 | 2-3  | H001N12 | E031L09 | Het    | 8.8 | 0.2  | 1.8 | 1.4  |
| 11 | 3-5  | s045H10 | s084O21 | Border | 5.1 | 0.1  | 0.5 | 0.1  |
| 11 | 5-6  | s017L16 | s105E01 | Border | 5.1 | 0.2  | 0.9 | 0.7  |
| 12 | 1-8  | E005K14 | H016B06 | Border | 5.1 | 0.1  | 0.4 | 0.2  |
| 12 | 8-7  | M038L04 | E036O23 | Border | 5.1 | 0.0  | 0.2 | 0.0  |

|    |                  |         |         |        |     |     |               |             |
|----|------------------|---------|---------|--------|-----|-----|---------------|-------------|
| 12 | 7-2              | E003D15 | M008A07 | Border | 5.1 | 0.1 | 0.4           | 0.1         |
| 12 | 2-6              | H003H12 | M023C14 | Het    | 8.8 | 0.1 | 0.7           | 0.6         |
| 12 | 6-5              | E004B02 | M040D19 | Het    | 8.8 | 0.1 | 0.8           | 0.5         |
| 12 | 5-3 <sup>6</sup> | E012H19 | H005D14 | Het    | 8.8 | 0.1 | 1.0           | 0.8         |
| 12 | 3-4              | M035N06 | M006L17 | Eu     | 1.5 | 0.1 | 0.1           | 0.0         |
| 12 | 4-9              | H017P17 | E031M18 | Eu     | 1.5 | 0.6 | 0.9           | 0.1         |
| 12 | 9-10             | E024H05 | H029L21 | Eu     | 1.5 | 0.1 | 0.2           | 0.0         |
|    |                  |         |         |        |     |     | <b>Total:</b> | <b>43.9</b> |

---

<sup>1</sup> Gaps are named by the two flanking scaffolds. Scaffold A is closer to the short arm of the chromosome, and across the gap, scaffold B is closer to the long arm of the chromosome. Scaffold number is based on scaffold order from head to tail of pseudomolecules based on the linkage map, and the number and name of each scaffold is defined in Table S1.

<sup>2</sup> BAC library names have been abbreviated. H=HindIII, E=EcoRI, M=MboI, s=sheared, F=Fosmid

<sup>3</sup>Eu=Euchromatin, Het=Pericentric Heterochromatin, Cent=Centromere, Chrom=Chromomere (non-pericentric heterochromatin), Border=in transition from euchromatin to heterochromatin. These landmarks are based on chromosome structure in SC spreads.

<sup>4</sup> Corrected gap size estimates are smaller than distance between BACs because BACs were not usually at the absolute end of the scaffold and FISH positions were calculated from the middle of the BAC rather than the end of the BAC. See Materials and Methods for procedure to correct gap size. Negative values have been changed to 0.

<sup>5</sup> Positions of the tail of scaffold 8, both ends of scaffolds 2 and 12, and the head of scaffold 10 are relatively uncertain, so estimates of the sizes of gaps 8-12, 12-2, and 2-10 are relatively uncertain as well.

<sup>6</sup> Tomato variety Heinz 1706 was used for measurements of this gap due to an inversion of the kinetochore compared to Cherry Tomato LA4444.

**Table S8 Comparison of gap sizes by optical mapping and FISH**

| Adjacent Scaffolds |               | FISH<br>Gap ID | Optical<br>Gap Size<br>(Kb) | FISH<br>Gap Size (Kb) | Difference in<br>Gap Size<br>(FISH minus<br>Optical) Kb <sup>1</sup> | Chromatin<br>Type <sup>3</sup> |
|--------------------|---------------|----------------|-----------------------------|-----------------------|----------------------------------------------------------------------|--------------------------------|
| SL2.40SC05611      | SL2.40SC05380 | Chr. 12: 9-10  | 0                           | 0 <sup>2</sup>        | 0                                                                    | Eu                             |
| SL2.40SC03622      | SL2.40SC05054 | Chr. 6: 7-8    | 1                           | 0 <sup>2</sup>        | -1                                                                   | Eu                             |
| SL2.40SC05732      | SL2.40SC05054 | Chr. 6: 6-7    | -2                          | 0 <sup>2</sup>        | 2                                                                    | Eu                             |
| SL2.40SC03798      | SL2.40SC05925 | Chr. 10: 1-2   | 2                           | 0 <sup>2</sup>        | -2                                                                   | Border                         |
| SL2.40SC05188      | SL2.40SC05732 | Chr. 6: 5-6    | 15                          | 0 <sup>2</sup>        | -15                                                                  | Het                            |
| SL2.40SC04813      | SL2.40SC03770 | Chr. 8: 1-2    | 19                          | 0 <sup>2</sup>        | -19                                                                  | Eu                             |
| SL2.40SC03835      | SL2.40SC04236 | Chr. 8: 6-3    | 23                          | 50                    | 27                                                                   | Het                            |
| SL2.40SC03852      | SL2.40SC04828 | Chr. 9: 8-9    | 46                          | 0 <sup>2</sup>        | -46                                                                  | Eu                             |
| SL2.40SC03701      | SL2.40SC06911 | Chr. 3: 3-13   | 37                          | 100                   | 63                                                                   | Eu                             |
| SL2.40SC04828      | SL2.40SC06214 | Chr. 9: 9-10   | 26                          | 100                   | 74                                                                   | Eu                             |
| SL2.40SC04236      | SL2.40SC03749 | Chr. 8: 5-6    | 76                          | 0 <sup>2</sup>        | -76                                                                  | Het                            |
| SL2.40SC04915      | SL2.40SC05611 | Chr. 12: 4-9   | 16                          | 100                   | 84                                                                   | Eu                             |
| SL2.40SC06917      | SL2.40SC06903 | Chr. 1: 8-7    | 33                          | 200                   | 167                                                                  | Eu                             |
| SL2.40SC05941      | SL2.40SC06917 | Chr. 1: 6-8    | 68                          | 300                   | 232                                                                  | Eu/Border                      |
| SL2.40SC03594      | SL2.40SC03666 | Chr. 1: 2-4    | 347                         | 600                   | 253                                                                  | Het                            |
| SL2.40SC05941      | SL2.40SC05010 | Chr. 1: 5-6    | 7                           | 300                   | 293                                                                  | Border                         |
| SL2.40SC04208      | SL2.40SC04732 | Chr. 2: 4-6    | 65                          | 400                   | 335                                                                  | Het                            |
| SL2.40SC03731      | SL2.40SC05397 | Chr. 7: 1-2    | 48                          | 400                   | 352                                                                  | Het                            |
| SL2.40SC06137      | SL2.40SC03876 | Chr. 11: 5-6   | 41                          | 700                   | 659                                                                  | Eu                             |
| SL2.40SC04950      | SL2.40SC04008 | Chr. 9: 4-3    | 124                         | 800                   | 676                                                                  | Het                            |
| SL2.40SC04757      | SL2.40SC04057 | Chr. 12: 5-3   | 42                          | 800                   | 758                                                                  | Het                            |
| SL2.40SC04701      | SL2.40SC03835 | Chr. 8: 3-4    | 32                          | 1000                  | 968                                                                  | Het                            |
| SL2.40SC04785      | SL2.40SC04950 | Chr. 9: 3-5    | 18                          | 1100                  | 1082                                                                 | Het                            |
| SL2.40SC04785      | SL2.40SC04777 | Chr. 9: 5-6    | 139                         | 1300                  | 1161                                                                 | Het                            |
| <b>Totals:</b>     |               |                | <b>1223</b>                 | <b>8250</b>           | <b>7027</b>                                                          |                                |

<sup>1</sup> The gap sizes are arranged in order of increasing absolute difference in gap size estimates. Gaps in euchromatin tend to be smaller than gaps in heterochromatin.

<sup>2</sup> A value of 0 kb indicates that a gap had a negative value after correcting for the position of FISH signals relative to the end of the scaffold (see Estimating Gap Sizes in Materials and Methods and in Results).

<sup>3</sup> Eu = euchromatin, Het = heterochromatin, Border = transition zone between euchromatin and heterochromatin

**Table S9 Estimates of tomato genome size (1C DNA amount)**

| Method                                       | Genome Size<br>pg (Mb equivalent) <sup>1</sup> | Reference                       |
|----------------------------------------------|------------------------------------------------|---------------------------------|
| Microspectrophotometry                       | 1.0 ( 965)                                     | (Bennett & Smith 1976)          |
| Microspectrophotometry and flow<br>cytometry | 0.95 ( 917)                                    | (Michaelson <i>et al.</i> 1991) |
| Flow cytometry                               | 0.75 ( 724)                                    | (Galbraith <i>et al.</i> 1983)  |
| Flow cytometry                               | 1.10 (1062)                                    | (Anderson <i>et al.</i> 1985)   |
| Flow cytometry                               | 1.0 ( 965)                                     | (Arumuganathan & Earle 1991)    |
| Flow cytometry                               | 0.98 ( 946)                                    | (Dolezel <i>et al.</i> 1992)    |
| Flow cytometry                               | 0.93 ( 897)                                    | (Valkonen 1994)                 |
| Flow cytometry                               | 1.00 ( 965)                                    | (Obermayer <i>et al.</i> 2002)  |
| Cot curve                                    | 0.86 ( 830)                                    | (Peterson <i>et al.</i> 1998)   |
| <b>Average</b>                               | <b>0.95 ( 919)</b>                             |                                 |

<sup>1</sup> Picograms were converted to megabase pairs (Mb) by multiplying the number of picograms (pg) times 965 Mb (Bennett & Smith 1976).

Anderson, L. K., S. M. Stack, M. H. Fox, and C. Zhang, 1985 The relationship between genome size and synaptonemal complex length in higher plants. *Exp. Cell Res.* **156**: 367-378.

Arumuganathan, K., and E. D. Earle, 1991 Nuclear DNA content of some important plant species. *Plant Mol. Biol. Repr.* **9**: 208-218.

Bennett, M. D., and J. B. Smith, 1976 Nuclear DNA amounts in angiosperms. *Phil. Trans. Roy. Soc. Lond. B* **274**: 227-274.

Dolezel, J., S. Sgorbati, and S. Lucretti, 1992 Comparison of three DNA fluorochromes for flow cytometric estimation of nuclear DNA content in plants. *Physiol. Plant.* **85**: 625-631.

Galbraith, D. W., K. R. Harkins, J. M. Maddox, N. M. Ayers, D. P. Sharma *et al.* 1983 Rapid flow cytometric analysis of the cell cycle in intact plant tissues. *Science* **220**: 1049-1051.

Michaelson, M. J., H. J. Price, J. R. Ellison, and J. S. Johnston, 1991 Comparison of plant DNA contents determined by Feulgen microspectrophotometry and laser flow cytometry. *Am. J. Bot.* **78**: 183-188.

Obermayer, R., I. J. Leitch, L. Hanson, and M. D. Bennett, 2002 Nuclear DNA C-values in 30 species double the familial representation in pteridophytes. *Ann. Bot.* **90**: 209-217.

Peterson, D. G., W. R. Pearson, and S. M. Stack, 1998 Characterization of the tomato (*Lycopersicon esculentum*) genome using in vitro and in situ DNA reassociation. *Genome* **41**: 346-356.

Valkonen, J. P. T., 1994 Nuclear DNA content of the Solanum spp. in the series Etuberosa as determined by laser flow cytometry. *Annals of Applied Botany* **125**: 589-600.

**Table S10 Location of unassigned (chromosome 0) BACs by FISH**

| Library  | BAC ID | Chromosome | Arm | % from KC | Gap ID <sup>1</sup> | Flanking Scaffold | Flanking Scaffold |
|----------|--------|------------|-----|-----------|---------------------|-------------------|-------------------|
| Mbo I    | 014K08 | 1          | S   | 0.6%      | 3-2                 | SL2.40sc04191     | SL2.40sc03666     |
| Mbo I    | 056H03 | 2          | S   | 8.3%      | 1-2                 | SL2.40sc06593     | SL2.40sc04142     |
| Mbo I    | 063O23 | 2          | S   | 8.1%      | 1-2                 | SL2.40sc06593     | SL2.40sc04142     |
| Mbo I    | 016G20 | 2          | S   | 7.7%      | 1-2                 | SL2.40sc06593     | SL2.40sc04142     |
| Mbo I    | 025G13 | 2          | S   | 7.7%      | 1-2                 | SL2.40sc06593     | SL2.40sc04142     |
| Hind III | 078N01 | 2          | S   | 7.3%      | 1-2                 | SL2.40sc06593     | SL2.40sc04142     |
| EcoR I   | 040P16 | 2          | S   | 6.8%      | 1-2                 | SL2.40sc06593     | SL2.40sc04142     |
| Hind III | 009K14 | 2          | S   | 6.7%      | 1-2                 | SL2.40sc06593     | SL2.40sc04142     |
| EcoR I   | 024C17 | 2          | S   | 6.6%      | 1-2                 | SL2.40sc06593     | SL2.40sc04142     |
| Mbo I    | 034C01 | 2          | S   | 6.2%      | 1-2                 | SL2.40sc06593     | SL2.40sc04142     |
| Mbo I    | 050I21 | 2          | S   | 6.0%      | 1-2                 | SL2.40sc06593     | SL2.40sc04142     |
| EcoR I   | 031O09 | 2          | S   | 5.9%      | 1-2                 | SL2.40sc06593     | SL2.40sc04142     |
| Mbo I    | 004J02 | 2          | S   | 5.9%      | 1-2                 | SL2.40sc06593     | SL2.40sc04142     |
| Mbo I    | 034J07 | 2          | S   | 5.9%      | 1-2                 | SL2.40sc06593     | SL2.40sc04142     |
| Hind III | 058D23 | 2          | S   | 5.7%      | 1-2                 | SL2.40sc06593     | SL2.40sc04142     |
| Hind III | 043D06 | 2          | S   | 5.6%      | 1-2                 | SL2.40sc06593     | SL2.40sc04142     |
| Hind III | 012G12 | 2          | S   | 5.3%      | 1-2                 | SL2.40sc06593     | SL2.40sc04142     |
| Hind III | 060L16 | 2          | S   | 5.3%      | 1-2                 | SL2.40sc06593     | SL2.40sc04142     |
| Mbo I    | 010K24 | 2          | L   | 16.9%     | 3-7                 | SL2.40sc03766     | SL2.40sc03665     |
| EcoR I   | 032D02 | 2          | L   | 17.0%     | 3-7                 | SL2.40sc03766     | SL2.40sc03665     |
| Mbo I    | 050I17 | 2          | L   | 17.3%     | 3-7                 | SL2.40sc03766     | SL2.40sc03665     |
| EcoR I   | 002O15 | 2          | L   | 17.3%     | 3-7                 | SL2.40sc03766     | SL2.40sc03665     |
| Hind III | 060D16 | 2          | L   | 17.4%     | 3-7                 | SL2.40sc03766     | SL2.40sc03665     |
| Mbo I    | 029F22 | 2          | L   | 17.5%     | 3-7                 | SL2.40sc03766     | SL2.40sc03665     |
| Hind III | 059K12 | 2          | L   | 17.9%     | 3-7                 | SL2.40sc03766     | SL2.40sc03665     |
| Hind III | 026M09 | 2          | L   | 17.9%     | 3-7                 | SL2.40sc03766     | SL2.40sc03665     |
| EcoR I   | 042F18 | 2          | L   | 18.1%     | 3-7                 | SL2.40sc03766     | SL2.40sc03665     |
| EcoR I   | 006L04 | 2          | L   | 18.1%     | 3-7                 | SL2.40sc03766     | SL2.40sc03665     |
| Hind III | 027N03 | 2          | L   | 18.2%     | 3-7                 | SL2.40sc03766     | SL2.40sc03665     |
| EcoR I   | 007J10 | 2          | L   | 18.3%     | 3-7                 | SL2.40sc03766     | SL2.40sc03665     |
| EcoR I   | 039I06 | 2          | L   | 18.8%     | 3-7                 | SL2.40sc03766     | SL2.40sc03665     |
| Hind III | 067G24 | 2          | L   | 18.9%     | 3-7                 | SL2.40sc03766     | SL2.40sc03665     |
| EcoR I   | 027P01 | 4          | L   | 0.3%      | 3-2                 | SL2.40sc05339     | SL2.40sc03683     |
| EcoR I   | 056L08 | 6          | S   | 32.6%     | 1-3                 | SL2.40sc04474     | SL2.40sc06140     |
| EcoR I   | 047D19 | 6          | S   | 31.7%     | 1-3                 | SL2.40sc04474     | SL2.40sc06140     |

|          |        |    |   |       |                  |                  |                  |
|----------|--------|----|---|-------|------------------|------------------|------------------|
| EcoR I   | 005K11 | 6  | S | 30.9% | 1-3              | SL2.40sc04474    | SL2.40sc06140    |
| EcoR I   | 031A01 | 6  | S | 30.8% | 1-3              | SL2.40sc04474    | SL2.40sc06140    |
| EcoR I   | 035D19 | 6  | S | 30.5% | 1-3              | SL2.40sc04474    | SL2.40sc06140    |
| Mbo I    | 049I18 | 6  | S | 29.8% | 1-3              | SL2.40sc04474    | SL2.40sc06140    |
| Hind III | 029E01 | 6  | S | 29.6% | 1-3              | SL2.40sc04474    | SL2.40sc06140    |
| Hind III | 027D17 | 6  | S | 28.9% | 1-3              | SL2.40sc04474    | SL2.40sc06140    |
| Hind III | 078K13 | 6  | S | 28.7% | 1-3              | SL2.40sc04474    | SL2.40sc06140    |
| Hind III | 002P09 | 6  | S | 28.6% | 1-3              | SL2.40sc04474    | SL2.40sc06140    |
| Mbo I    | 016K18 | 6  | S | 28.1% | 1-3              | SL2.40sc04474    | SL2.40sc06140    |
| EcoR I   | 021L01 | 6  | S | 27.6% | 1-3              | SL2.40sc04474    | SL2.40sc06140    |
| Hind III | 001E08 | 6  | S | 27.3% | 1-3              | SL2.40sc04474    | SL2.40sc06140    |
| EcoR I   | 013G12 | 6  | S | 25.8% | 1-3              | SL2.40sc04474    | SL2.40sc06140    |
| EcoR I   | 025E06 | 7  | S | 57.1% | n/a <sup>2</sup> | n/a <sup>2</sup> | n/a <sup>2</sup> |
| Hind III | 003K20 | 7  | L | 13.6% | n/a <sup>2</sup> | n/a <sup>2</sup> | n/a <sup>2</sup> |
| Hind III | 027F11 | 7  | L | 19.3% | 2-3              | SL2.40sc05397    | SL2.40sc03685    |
| EcoR I   | 021M11 | 7  | L | 19.5% | 2-3              | SL2.40sc05397    | SL2.40sc03685    |
| EcoR I   | 041L20 | 7  | L | 19.9% | 2-3              | SL2.40sc05397    | SL2.40sc03685    |
| EcoR I   | 041L23 | 7  | L | 19.9% | 2-3              | SL2.40sc05397    | SL2.40sc03685    |
| Hind III | 042K23 | 7  | L | 20.5% | 2-3              | SL2.40sc05397    | SL2.40sc03685    |
| Hind III | 036D05 | 7  | L | 21.1% | 2-3              | SL2.40sc05397    | SL2.40sc03685    |
| Hind III | 025A06 | 7  | L | 21.3% | 2-3              | SL2.40sc05397    | SL2.40sc03685    |
| Mbo I    | 017I04 | 7  | L | 21.5% | 2-3              | SL2.40sc05397    | SL2.40sc03685    |
| Mbo I    | 017P20 | 7  | L | 21.5% | 2-3              | SL2.40sc05397    | SL2.40sc03685    |
| Hind III | 012C17 | 7  | L | 23.1% | 2-3              | SL2.40sc05397    | SL2.40sc03685    |
| EcoR I   | 002D11 | 8  | S | 36.5% | 7-5              | SL2.40sc04167    | SL2.40sc03749    |
| Hind III | 041G04 | 8  | S | 35.7% | 7-5              | SL2.40sc04167    | SL2.40sc03749    |
| Mbo I    | 041D13 | 8  | S | 34.9% | 7-5              | SL2.40sc04167    | SL2.40sc03749    |
| EcoR I   | 008F12 | 8  | L | 3.1%  | n/a <sup>2</sup> | n/a <sup>2</sup> | n/a <sup>2</sup> |
| Mbo I    | 056H18 | 9  | S | 9.4%  | 1-4              | SL2.40sc03771    | SL2.40sc04008    |
| Hind III | 072H18 | 9  | S | 6.6%  | 1-4              | SL2.40sc03771    | SL2.40sc04008    |
| Mbo I    | 045G03 | 9  | S | 3.4%  | 1-4              | SL2.40sc03771    | SL2.40sc04008    |
| EcoR I   | 052D12 | 9  | S | 3.4%  | 1-4              | SL2.40sc03771    | SL2.40sc04008    |
| Mbo I    | 042F10 | 9  | L | 99.6% | 10-T             | SL2.40sc06214    | telomere         |
| EcoR I   | 045G19 | 11 | L | 8.0%  | n/a <sup>2</sup> | n/a <sup>2</sup> | n/a <sup>2</sup> |
| Mbo I    | 047F15 | 11 | L | 14.3% | 2-3              | SL2.40sc04054    | SL2.40sc03752    |
| Hind III | 062E02 | 11 | L | 15.2% | 2-3              | SL2.40sc04054    | SL2.40sc03752    |
| Mbo I    | 050G12 | 12 | S | 36.9% | 1-8              | SL2.40sc04607    | SL2.40sc06147    |
| EcoR I   | 010P04 | 12 | S | 35.8% | 8-7              | SL2.40sc06147    | SL2.40sc04039    |
| Hind III | 006G23 | 12 | L | 23.6% | n/a <sup>2</sup> | n/a <sup>2</sup> | n/a <sup>2</sup> |

|        |        |    |   |       |      |               |               |
|--------|--------|----|---|-------|------|---------------|---------------|
| EcoR I | 045D23 | 12 | L | 81.0% | 9-10 | SL2.40sc05611 | SL2.40sc05380 |
|--------|--------|----|---|-------|------|---------------|---------------|

---

<sup>1</sup>Gap ID refers to the gap name given in the FISH Scaffold/Gap diagrams and is derived from the linkage map-based order of the scaffolds.

<sup>2</sup> BAC is not within a gap

**Table S11 List of all of unassigned (chromosome 0) BACs.**

Available for download as an Excel file at <http://www.g3journal.org/lookup/suppl/doi:10.1534/g3.114.011197/-/DC1>
