# Supplementary material for: Fluorescence In Situ Hybridization and Optical Mapping to Correct Scaffold Arrangement in the Tomato Genome
Source: PubMed Central journal article supplement (PMC4132171; doi:10.1534/g3.114.011197), 2014-05-30
Supplement: supp_g3.114.011197_TableS2.pdf [file supp_g3.114.011197_TableS2.pdf]

**Table S2 Tomato SC karyotype<sup>1</sup>**

| <b>Chromosome number</b> | <b>% of set</b> | <b>Chromosome length (μm)</b> | <b>Arm ratio</b> | <b>Short arm length (μm)</b> | <b>Long arm length (μm)</b> |
|--------------------------|-----------------|-------------------------------|------------------|------------------------------|-----------------------------|
| 1                        | 13.1            | 26.8                          | 3.00             | 6.7                          | 20.1                        |
| 2                        | 8.5             | 24.9                          | 3.15             | 6.0                          | 18.9                        |
| 3                        | 9.8             | 20.5                          | 3.27             | 4.8                          | 15.7                        |
| 4                        | 8.7             | 18.3                          | 2.59             | 5.1                          | 13.2                        |
| 5                        | 7.2             | 14.6                          | 1.06             | 7.1                          | 7.5                         |
| 6                        | 7.9             | 16.4                          | 3.43             | 3.7                          | 12.7                        |
| 7                        | 7.8             | 15.9                          | 1.80             | 5.6                          | 10.3                        |
| 8                        | 7.9             | 16.6                          | 2.39             | 4.9                          | 11.7                        |
| 9                        | 7.8             | 15.9                          | 1.83             | 5.6                          | 10.3                        |
| 10                       | 7.2             | 14.9                          | 2.10             | 4.8                          | 10.1                        |
| 11                       | 6.9             | 14.5                          | 1.23             | 6.5                          | 8.0                         |
| 12                       | 7.2             | 14.6                          | 1.06             | 7.1                          | 7.5                         |
| <b>Total</b>             | <b>100.0</b>    | <b>213.9</b>                  |                  | <b>67.9</b>                  | <b>146.0</b>                |

<sup>1</sup>Modified from Sherman and Stack (1992) and Peterson et al. (1995)
