# Supplementary material for: Fluorescence In Situ Hybridization and Optical Mapping to Correct Scaffold Arrangement in the Tomato Genome
Source: PubMed Central journal article supplement (PMC4132171; doi:10.1534/g3.114.011197), 2014-05-30
Supplement: supp_g3.114.011197_TableS3.pdf [file supp_g3.114.011197_TableS3.pdf]

**Table S3 All BACs and repeated sequences located by FISH on tomato SCs. Unless otherwise noted, all BACs are from the HindIII BAC library.**

| Chromosome arm | BAC            | Position % | Position um (SC) | Scaffold | Legend Key                                                        |
|----------------|----------------|------------|------------------|----------|-------------------------------------------------------------------|
|                | Telomere       | 100.0%     | 0.0              |          | <b>S = short arm; L = long arm</b>                                |
| 1S             | SL_s0090M22    | 98.5%      | 0.1              | S1       | Telomere                                                          |
| 1S             | 165H20         | 92.6%      | 0.5              |          | Eu/Het border using RNs to adjust estimate based on SC appearance |
| 1S             | 088A08         | 88.5%      | 0.8              |          | Centromere                                                        |
|                |                |            |                  |          | Less than 1 micron from a telomere or eu/het border               |
| 1S             | 130I12         | 85.7%      | 1.0              |          | Less than 1 micron from a centromere                              |
| 1S             | 069E17         | 84.1%      | 1.1              |          | End of a scaffold                                                 |
| 1S             | 240P19         | 83.0%      | 1.1              |          | BAC with 2 positions                                              |
| 1S             | 262O22         | 79.7%      | 1.4              |          | Repeated sequences                                                |
| 1S             | 305J13         | 78.3%      | 1.5              |          | IGS = inter-genic                                                 |
| 1S             | 291L11         | 76.4%      | 1.6              |          | spacer repeat from rDNA                                           |
| 1S             | 263P17         | 75.6%      | 1.6              |          |                                                                   |
| 1S             | 032H01         | 64.3%      | 2.4              |          |                                                                   |
| 1S             | 003D15         | 63.5%      | 2.4              |          |                                                                   |
| 1S             | Eu/Het border  | 55.0%      | 3.0              |          |                                                                   |
| 1S             | SL_Mbol0012I20 | 53.5%      | 3.1              |          |                                                                   |

|    |                       |       |      |    |
|----|-----------------------|-------|------|----|
| 1S | SL_Mbol0081L19        | 53.2% | 3.1  |    |
| 1S | 177F14                | 26.4% | 4.9  |    |
| 1S | 107C12                | 16.5% | 5.6  |    |
| 1S | SL_Mbol0034D03        | 12.5% | 5.9  | S1 |
| 1S | 027P13                | 12.4% | 5.9  |    |
| 1S | 5S rDNA               | 9.8%  | 6.0  |    |
| 1S | SL_s0053P14           | 6.6%  | 6.3  | S3 |
| 1S | 081I16                | 5.8%  | 6.3  |    |
| 1S | SL_s0083L21           | 3.2%  | 6.5  | S3 |
| 1S | IGS-derived satellite | 1.8%  | 6.6  |    |
| 1S | SL_Mbol0014K08        | 0.6%  | 6.7  |    |
|    | Centromere            | 0.0%  | 6.7  |    |
| 1L | SL_EcoRI0016I11       | 2.0%  | 7.1  | S2 |
| 1L | 054N01                | 2.2%  | 7.2  |    |
| 1L | SL_s0006A13           | 3.2%  | 7.3  | S2 |
| 1L | 033N15                | 3.2%  | 7.3  | S4 |
| 1L | 256E08                | 6.3%  | 8.0  |    |
| 1L | SL_s0042B18           | 6.9%  | 8.1  | S4 |
| 1L | SL_Mbol0042O02        | 7.2%  | 8.1  | S5 |
| 1L | 061J17                | 9.5%  | 8.6  |    |
| 1L | 252G05                | 12.8% | 9.3  |    |
| 1L | 017P20                | 18.1% | 10.3 |    |
| 1L | 174H02                | 20.1% | 10.7 |    |
| 1L | 126F09                | 20.7% | 10.9 |    |

|    |                 |       |      |    |
|----|-----------------|-------|------|----|
| 1L | 048O19          | 20.8% | 10.9 |    |
| 1L | Eu/Het border   | 21.0% | 10.9 |    |
| 1L | 023H04          | 21.3% | 11.0 |    |
| 1L | 163B20          | 21.3% | 11.0 |    |
| 1L | 037N04          | 21.6% | 11.0 | S5 |
| 1L | SL_s0040G18     | 21.8% | 11.1 | S6 |
| 1L | 095K03          | 23.9% | 11.5 |    |
| 1L | 033C15          | 25.7% | 11.9 |    |
| 1L | 305F14          | 26.0% | 11.9 |    |
| 1L | 087D19          | 26.8% | 12.1 |    |
| 1L | SL_EcoRI0021C24 | 30.3% | 12.8 | S6 |
| 1L | SL_s0022L14     | 30.6% | 12.9 | S8 |
| 1L | 004L01          | 30.6% | 12.9 |    |
| 1L | 210F09          | 31.6% | 13.1 |    |
| 1L | SL_MboI0017A22  | 32.0% | 13.1 |    |
| 1L | SL_MboI0008G17  | 32.0% | 13.1 |    |
| 1L | SL_MboI0034B03  | 32.4% | 13.2 |    |
| 1L | SL_EcoRI0021A20 | 32.6% | 13.3 |    |
| 1L | SL_EcoRI0022O19 | 34.4% | 13.6 |    |
| 1L | 055E23          | 34.8% | 13.7 |    |
| 1L | 001J06          | 35.0% | 13.7 |    |
| 1L | SL_s0121I01     | 36.0% | 13.9 | S8 |
| 1L | SL_s0071P10     | 36.6% | 14.1 | S7 |
| 1L | 067M04          | 36.8% | 14.1 |    |

|           |                    |              |             |           |
|-----------|--------------------|--------------|-------------|-----------|
| 1L        | 039M19             | 36.8%        | 14.1        |           |
| <b>1L</b> | <b>SL_s0024J19</b> | <b>37.3%</b> | <b>14.2</b> | <b>S9</b> |
| 1L        | 029G15             | 37.3%        | 14.2        |           |
| 1L        | 155M04             | 38.4%        | 14.4        |           |
| <b>1L</b> | <b>006D05</b>      | <b>45.3%</b> | <b>15.8</b> |           |
| 1L        | 329A12             | 49.2%        | 16.6        |           |
| 1L        | 289N16             | 51.3%        | 17.0        |           |
| 1L        | 035M19             | 52.0%        | 17.2        |           |
| 1L        | 182E16             | 52.3%        | 17.2        |           |
| 1L        | 053C22             | 52.3%        | 17.2        |           |
| <b>1L</b> | <b>305L18</b>      | <b>53.2%</b> | <b>17.4</b> |           |
| 1L        | 208M24             | 54.2%        | 17.6        |           |
| 1L        | 034P21             | 55.2%        | 17.8        |           |
| 1L        | 049F03             | 56.1%        | 18.0        |           |
| 1L        | 330O05             | 58.0%        | 18.4        |           |
| 1L        | 108J06             | 58.4%        | 18.4        |           |
| 1L        | 140O23             | 58.6%        | 18.5        |           |
| 1L        | 234D05             | 59.1%        | 18.6        |           |
| 1L        | 080J18             | 59.8%        | 18.7        |           |
| 1L        | 309D12             | 61.5%        | 19.1        |           |
| 1L        | 125A09             | 62.3%        | 19.2        |           |
| 1L        | 203E06             | 63.1%        | 19.4        |           |
| 1L        | 123A07             | 64.0%        | 19.6        |           |
| 1L        | 169H23             | 64.0%        | 19.6        |           |

|    |                 |       |      |
|----|-----------------|-------|------|
| 1L | 058O13          | 64.2% | 19.6 |
| 1L | 057C07          | 66.2% | 20.0 |
| 1L | 159C14          | 66.8% | 20.1 |
| 1L | 165M11          | 66.8% | 20.1 |
| 1L | 051C14          | 67.8% | 20.3 |
| 1L | 010F03          | 68.7% | 20.5 |
| 1L | 005L21          | 69.5% | 20.7 |
| 1L | 001H15          | 70.0% | 20.8 |
| 1L | 302G11          | 70.5% | 20.9 |
| 1L | 057A01          | 72.3% | 21.2 |
| 1L | SL_EcoRI0127B04 | 72.6% | 21.3 |
| 1L | 111D21          | 73.9% | 21.6 |
| 1L | 024O06          | 75.1% | 21.8 |
| 1L | 043D23          | 75.3% | 21.8 |
| 1L | 164M23          | 76.1% | 22.0 |
| 1L | 243A15          | 76.7% | 22.1 |
| 1L | 026N10          | 77.8% | 22.3 |
| 1L | 057J16          | 78.9% | 22.6 |
| 1L | 049P09          | 81.3% | 23.0 |
| 1L | 037D10          | 82.9% | 23.4 |
| 1L | 245N21          | 83.8% | 23.5 |
| 1L | 002F21          | 83.8% | 23.5 |
| 1L | 100N21          | 84.4% | 23.7 |
| 1L | 079N04          | 85.4% | 23.9 |

|           |               |              |             |
|-----------|---------------|--------------|-------------|
| 1L        | 092H13        | 85.4%        | 23.9        |
| <b>1L</b> | <b>033M02</b> | <b>85.7%</b> | <b>23.9</b> |
| 1L        | 239E07        | 89.5%        | 24.7        |
| 1L        | 064D24        | 90.3%        | 24.9        |
| 1L        | 008L19        | 91.3%        | 25.0        |
| 1L        | 131F15        | 94.2%        | 25.6        |

|           |                       |              |             |           |
|-----------|-----------------------|--------------|-------------|-----------|
| 1L        | 128J14                | 95.2%        | 25.8        |           |
| 1L        | 043P11                | 96.7%        | 26.1        |           |
| 1L        | 231M15                | 99.1%        | 26.6        |           |
| 1L        | 088L02                | 99.5%        | 26.7        |           |
| <b>1L</b> | <b>SL_Mbol0028C09</b> | <b>99.8%</b> | <b>26.8</b> | <b>S9</b> |
| 1L        | Telomere              | 100.0%       | 26.8        |           |

|    |                    |        |     |    |
|----|--------------------|--------|-----|----|
| 2S | Telo./Break Point* | 100.0% | 0.0 |    |
| 2S | 45S rDNA           | 16.0%  | 3.0 |    |
| 2S | SL_EcoRI0007F19    | 15.6%  | 3.1 | S4 |
| 2S | SL_EcoRI0008B15    | 14.4%  | 3.3 | S4 |
| 2S | SL_s0053E24        | 14.0%  | 3.4 | S6 |
| 2S | SL_s0044P10        | 13.1%  | 3.5 | S6 |
| 2S | LE_HBa0011G24      | 13.1%  | 3.5 | S5 |
| 2S | SL_s0056I16        | 10.2%  | 4.1 | S5 |
| 2S | SL_Mbol0036C03     | 10.2%  | 4.1 | S1 |
| 2S | SL_Mbol0056H03     | 8.3%   | 4.4 |    |
| 2S | SL_Mbol0063O23     | 8.1%   | 4.5 |    |

|           |                       |             |            |           |
|-----------|-----------------------|-------------|------------|-----------|
| <b>2S</b> | <b>SL_s0079J24</b>    | <b>7.7%</b> | <b>4.5</b> | <b>S1</b> |
| 2S        | SL_Mbol0025G13        | 7.7%        | 4.5        |           |
| 2S        | SL_Mbol0016G20        | 7.7%        | 4.5        |           |
| 2S        | 078N01                | 7.3%        | 4.6        |           |
| 2S        | SL_EcoRI0040P16       | 6.8%        | 4.7        |           |
| 2S        | 009K14                | 6.7%        | 4.7        |           |
| 2S        | 111L05                | 6.7%        | 4.7        |           |
| 2S        | SL_EcoRI0024C17       | 6.6%        | 4.8        |           |
| 2S        | SL_Mbol0034C01        | 6.2%        | 4.8        |           |
| 2S        | SL_Mbol0050I21        | 6.0%        | 4.9        |           |
| 2S        | SL_Mbol0034J07        | 5.9%        | 4.9        |           |
| 2S        | SL_EcoRI0031O09       | 5.9%        | 4.9        |           |
| 2S        | SL_Mbol0004J02        | 5.9%        | 4.9        |           |
| 2S        | 058D23                | 5.7%        | 4.9        |           |
| 2S        | 043D06                | 5.6%        | 4.9        |           |
| 2S        | 060L16                | 5.3%        | 5.0        |           |
| 2S        | 012G12                | 5.3%        | 5.0        |           |
| <b>2S</b> | <b>SL_s0053C07</b>    | <b>5.2%</b> | <b>5.0</b> | <b>S2</b> |
| 2S        | 090J13                | 4.4%        | 5.2        |           |
|           | Centromere            | 0.0%        | 6.0        |           |
| <b>2L</b> | <b>SL_s0050E09</b>    | <b>2.9%</b> | <b>6.5</b> | <b>S2</b> |
| 2L        | 006P20                | 3.2%        | 6.6        |           |
| <b>2L</b> | <b>SL_Mbol0021A03</b> | <b>3.5%</b> | <b>6.7</b> | <b>S3</b> |
| 2L        | 060G11                | 5.5%        | 7.0        |           |

2L IGS-derived satellite 8.4% 7.6

| 2L        | Eu/Het border          | 14.0%        | 8.6        |
|-----------|------------------------|--------------|------------|
| 2L        | 176A14                 | 16.7%        | 9.2        |
| <b>2L</b> | <b>SL_EcoRI0034J17</b> | <b>16.8%</b> | <b>9.2</b> |
| 2L        | SL_Mbol0010K24         | 16.9%        | 9.2        |
| 2L        | SL_EcoRI0032D02        | 17.0%        | 9.2        |
| 2L        | SL_Mbol0050I17         | 17.3%        | 9.3        |
| 2L        | SL_EcoRI0002O15        | 17.3%        | 9.3        |
| 2L        | 060D16                 | 17.4%        | 9.3        |
| 2L        | SL_Mbol0029F22         | 17.5%        | 9.3        |
| <b>2L</b> | <b>101C24</b>          | <b>17.9%</b> | <b>9.4</b> |
| 2L        | 026M09                 | 17.9%        | 9.4        |
| 2L        | 059K12                 | 17.9%        | 9.4        |
| 2L        | SL_EcoRI0006L04        | 18.1%        | 9.4        |
| 2L        | SL_EcoRI0042F18        | 18.1%        | 9.4        |
| 2L        | 027N03                 | 18.2%        | 9.4        |
| 2L        | SL_EcoRI0007J10        | 18.3%        | 9.5        |
| 2L        | SL_EcoRI0039I06        | 18.8%        | 9.6        |
| <b>2L</b> | <b>SL_s0101F18</b>     | <b>18.8%</b> | <b>9.6</b> |
| 2L        | 067G24                 | 18.9%        | 9.6        |
| 2L        | 303I24                 | 26.7%        | 11.0       |
| 2L        | 286I11                 | 65.4%        | 18.4       |
| 2L        | 108A18                 | 69.4%        | 19.1       |
| 2L        | 106H06                 | 72.6%        | 19.7       |

**S3**

**S7**



|    |        |       |      |
|----|--------|-------|------|
| 2L | 118M12 | 73.4% | 19.9 |
| 2L | 001M12 | 77.3% | 20.6 |
| 2L | 189G15 | 77.7% | 20.7 |

|           |                       |               |             |           |
|-----------|-----------------------|---------------|-------------|-----------|
| 2L        | SL_Mbol0055O24        | 95.7%         | 24.1        |           |
| 2L        | 064B17                | 96.2%         | 24.2        |           |
| 2L        | SL_EcoRI0034H10       | 96.3%         | 24.2        |           |
| 2L        | 072B02                | 96.9%         | 24.3        |           |
| 2L        | SL_EcoRI0042D07       | 97.2%         | 24.4        |           |
| 2L        | SL_EcoRI0061K08       | 98.4%         | 24.6        |           |
| 2L        | 257H21                | 98.7%         | 24.7        |           |
| 2L        | 098J01                | 99.1%         | 24.7        |           |
| 2L        | 032J10                | 99.6%         | 24.8        |           |
| 2L        | 177F12                | 99.8%         | 24.9        |           |
| <b>2L</b> | <b>SL_Mbol0017J13</b> | <b>100.0%</b> | <b>24.9</b> | <b>S7</b> |
| 2L        | Telomere              | 100.0%        | 24.9        |           |
| 3S        | Telomere              | 100.0%        | 0.0         |           |
| <b>3S</b> | <b>SL_s0009C01</b>    | <b>99.3%</b>  | <b>0.0</b>  | <b>S1</b> |
| 3S        | 020P05                | 98.0%         | 0.1         |           |
| 3S        | SL_Mbol0103M17        | 96.6%         | 0.2         |           |
| 3S        | 203C09                | 94.8%         | 0.3         |           |
| 3S        | SL_FOS0082H20         | 92.4%         | 0.4         |           |
| 3S        | SL_FOS0097P22         | 92.1%         | 0.4         |           |
| 3S        | 137K15                | 80.6%         | 0.9         |           |
| 3S        | 257N18                | 72.6%         | 1.3         |           |

|           |                    |              |            |           |
|-----------|--------------------|--------------|------------|-----------|
| <b>3S</b> | <b>SL_s0086D22</b> | <b>70.2%</b> | <b>1.4</b> | <b>S1</b> |
| <b>3S</b> | <b>SL_s0018K15</b> | <b>65.1%</b> | <b>1.7</b> | <b>S4</b> |
| 3S        | 030A11             | 65.0%        | 1.7        |           |
| 3S        | 031M05             | 62.1%        | 1.8        |           |
| <b>3S</b> | <b>SL_s0002G24</b> | <b>54.9%</b> | <b>2.2</b> | <b>S4</b> |
| <b>3S</b> | <b>SL_s0050E05</b> | <b>52.5%</b> | <b>2.3</b> | <b>S5</b> |
| <b>3S</b> | <b>037B06</b>      | <b>34.2%</b> | <b>3.2</b> | <b>S5</b> |
| <b>3S</b> | <b>020G20</b>      | <b>29.8%</b> | <b>3.4</b> | <b>S6</b> |

|           |                        |              |            |           |
|-----------|------------------------|--------------|------------|-----------|
| <b>3S</b> | <b>Eu/Het border</b>   | <b>25.0%</b> | <b>3.6</b> |           |
| 3S        | 130G19                 | 17.9%        | 3.9        |           |
| 3S        | 162G22                 | 16.2%        | 4.0        |           |
| <b>3S</b> | <b>039C15</b>          | <b>10.2%</b> | <b>4.3</b> | <b>S6</b> |
| 3S        | IGS-derived satellite  | 1.9%         | 4.7        |           |
|           | <b>Centromere</b>      | <b>0.0%</b>  | <b>4.8</b> |           |
| <b>3L</b> | <b>SL_Mbol0079O10</b>  | <b>0.5%</b>  | <b>4.9</b> | <b>S9</b> |
| 3L        | 007J09                 | 3.7%         | 5.4        |           |
| <b>3L</b> | <b>SL_Mbol0002J15</b>  | <b>4.3%</b>  | <b>5.5</b> | <b>S9</b> |
| <b>3L</b> | <b>244B01</b>          | <b>4.7%</b>  | <b>5.5</b> | <b>S7</b> |
| <b>3L</b> | <b>SL_EcoRI0121G21</b> | <b>6.5%</b>  | <b>5.8</b> | <b>S7</b> |
| <b>3L</b> | <b>027L13</b>          | <b>7.4%</b>  | <b>6.0</b> | <b>S8</b> |
| 3L        | 197O22                 | 10.7%        | 6.5        |           |
| 3L        | 014A17                 | 15.3%        | 7.2        |           |
| 3L        | 077H15                 | 15.6%        | 7.2        |           |
| <b>3L</b> | <b>SL_s0071G06</b>     | <b>21.5%</b> | <b>8.2</b> | <b>S8</b> |

|    |                 |       |      |     |
|----|-----------------|-------|------|-----|
| 3L | SL_s0042B23     | 22.3% | 8.3  | S2  |
| 3L | SL_Mbol0022A20  | 22.4% | 8.3  |     |
| 3L | SL_Mbol0018H18  | 22.6% | 8.3  |     |
| 3L | 157B13          | 23.1% | 8.4  |     |
| 3L | 011P01          | 23.2% | 8.4  |     |
| 3L | SL_Mbol0023D14  | 23.2% | 8.4  |     |
| 3L | 084A03          | 23.4% | 8.5  |     |
| 3L | SL_EcoRI0018K21 | 23.4% | 8.5  | S12 |
| 3L | 028L03          | 23.7% | 8.5  | S12 |
| 3L | SL_Mbol0011B02  | 24.0% | 8.6  |     |
| 3L | 011C02          | 25.9% | 8.9  |     |
| 3L | 037N01          | 26.1% | 8.9  | S10 |
| 3L | SL_Mbol0015M02  | 26.2% | 8.9  |     |
| 3L | 030A19          | 26.3% | 8.9  | S2  |
| 3L | 299H10          | 26.5% | 9.0  |     |
| 3L | Eu/Het border   | 28.0% | 9.2  |     |
| 3L | 031P17          | 35.5% | 10.4 |     |
| 3L | 101C24          | 37.9% | 10.7 |     |
| 3L | 001H05          | 38.2% | 10.8 | S10 |
| 3L | 028E17          | 38.8% | 10.9 |     |
| 3L | 254B14          | 39.1% | 10.9 |     |
| 3L | SL_Mbol0003H09  | 39.6% | 11.0 | S11 |
| 3L | SL_s0003D15     | 47.7% | 12.3 |     |
| 3L | SL_EcoRI0031G05 | 55.0% | 13.4 | S11 |

|    |                 |       |      |     |
|----|-----------------|-------|------|-----|
| 3L | SL_Mbol0015G06  | 57.4% | 13.8 | S3  |
| 3L | SL_s0048H23     | 57.7% | 13.9 | S3  |
| 3L | SL_EcoRI0034O23 | 57.9% | 13.9 |     |
| 3L | 117I12          | 58.4% | 14.0 |     |
| 3L | SL_EcoRI0006F17 | 59.8% | 14.2 | S13 |
| 3L | 157P11          | 78.3% | 17.1 |     |
| 3L | 276M05          | 80.2% | 17.4 |     |

|    |                 |        |      |     |
|----|-----------------|--------|------|-----|
| 3L | 241F16          | 94.2%  | 19.6 |     |
| 3L | 142A05          | 96.0%  | 19.9 |     |
| 3L | 159C06          | 97.0%  | 20.0 |     |
| 3L | SL_EcoRI0034G21 | 99.3%  | 20.4 | S13 |
| 3L | Telomere        | 100.0% | 20.5 |     |
| 4S | Telomere        | 100.0% | 0.0  |     |
| 4S | SL_Mbol0035I14  | 97.9%  | 0.1  | S1  |

|    |        |       |     |  |
|----|--------|-------|-----|--|
| 4S | 008K08 | 73.6% | 1.3 |  |
| 4S | 036C23 | 60.3% | 2.0 |  |

|    |                 |       |     |    |
|----|-----------------|-------|-----|----|
| 4S | 323C04          | 49.1% | 2.6 |    |
| 4S | Eu/Het border   | 39.0% | 3.1 |    |
| 4S | 062J03          | 32.6% | 3.4 |    |
| 4S | 209A01          | 30.8% | 3.5 |    |
| 4S | 012B20          | 14.7% | 4.4 | S1 |
| 4S | SL_EcoRI0036D15 | 13.6% | 4.4 | S3 |
| 4S | 018I03          | 1.0%  | 5.0 | S3 |
|    | Centromere      | 0.0%  | 5.1 |    |

|           |                       |              |             |           |
|-----------|-----------------------|--------------|-------------|-----------|
| 4L        | SL_EcoRI0027P01       | 0.3%         | 5.1         |           |
| <b>4L</b> | <b>SL_Mbol0036H17</b> | <b>0.9%</b>  | <b>5.2</b>  | <b>S2</b> |
| 4L        | 059C20                | 8.2%         | 6.2         |           |
| 4L        | 105J24                | 12.0%        | 6.7         |           |
| 4L        | 030F21                | 16.1%        | 7.2         |           |
| 4L        | 007D04                | 16.5%        | 7.3         |           |
| 4L        | 203K18                | 17.8%        | 7.4         |           |
| <b>4L</b> | <b>SL_Mbol0016J15</b> | <b>19.9%</b> | <b>7.7</b>  | <b>S2</b> |
| <b>4L</b> | <b>SL_Mbol0038M16</b> | <b>20.1%</b> | <b>7.8</b>  | <b>S4</b> |
| 4L        | 006E18                | 24.5%        | 8.3         |           |
| 4L        | SL_Mbol0078A08        | 24.8%        | 8.4         |           |
| 4L        | SL_Mbol0120F05        | 29.6%        | 9.0         |           |
| 4L        | Eu/Het border         | 33.0%        | 9.5         |           |
| 4L        | 291H22                | 37.3%        | 10.0        |           |
| 4L        | 119A16                | 38.0%        | 10.1        |           |
| 4L        | 020F17                | 40.7%        | 10.5        |           |
| 4L        | 077O05                | 44.8%        | 11.0        |           |
| 4L        | 078E04                | 50.9%        | 11.8        |           |
| 4L        | 208L16                | 54.4%        | 12.3        |           |
| <b>4L</b> | <b>SL_Mbol0029O16</b> | <b>54.6%</b> | <b>12.3</b> | <b>S4</b> |
| <b>4L</b> | <b>013P02</b>         | <b>54.9%</b> | <b>12.3</b> | <b>S5</b> |
| 4L        | 132O11                | 54.9%        | 12.3        |           |
| 4L        | 171B19                | 55.5%        | 12.4        |           |
| <b>4L</b> | <b>SL_Mbol0018D12</b> | <b>57.9%</b> | <b>12.7</b> | <b>S5</b> |

|           |                       |              |             |           |
|-----------|-----------------------|--------------|-------------|-----------|
| 4L        | Chromomere            | 58.1%        | 12.8        |           |
| <b>4L</b> | <b>020C13</b>         | <b>59.5%</b> | <b>13.0</b> | <b>S6</b> |
| 4L        | 094K06                | 59.2%        | 12.9        |           |
| 4L        | SL_Mbol0039E17        | 65.2%        | 13.7        |           |
| 4L        | 053M02                | 74.6%        | 14.9        |           |
| 4L        | 008K13                | 82.3%        | 16.0        |           |
| 4L        | 303A06                | 95.4%        | 17.7        |           |
| 4L        | 106F07                | 98.2%        | 18.1        |           |
| <b>4L</b> | <b>SL_Mbol0023M21</b> | <b>98.9%</b> | <b>18.2</b> | <b>S6</b> |
| 4L        | Telomere              | 100.0%       | 18.3        |           |
| 5S        | Telomere              | 100.0%       | 0.0         |           |
| <b>5S</b> | <b>SL_s0094J05</b>    | <b>98.9%</b> | <b>0.1</b>  | <b>S1</b> |
| 5S        | 189E17                | 90.6%        | 0.7         |           |
| 5S        | 309L13                | 76.6%        | 1.7         |           |
| 5S        | 147F10                | 67.4%        | 2.3         |           |
| 5S        | 157F14                | 63.5%        | 2.6         |           |
| 5S        | 298C03                | 54.7%        | 3.2         |           |
| 5S        | 149J17                | 40.4%        | 4.2         |           |
| 5S        | Eu/Het border         | 40.0%        | 4.3         |           |
| 5S        | 116D11                | 30.2%        | 5.0         |           |
| 5S        | 282A06                | 28.3%        | 5.1         |           |
| 5S        | 255N21                | 27.6%        | 5.1         |           |
| 5S        | 303C11                | 20.5%        | 5.6         |           |
| 5S        | 107A04                | 19.1%        | 5.7         |           |

|    |                 |        |      |    |
|----|-----------------|--------|------|----|
| 5S | 011G20          | 7.9%   | 6.5  |    |
|    | Centromere      | 0.0%   | 7.1  |    |
| 5L | SL_Mbol0058F07  | 8.5%   | 7.7  |    |
| 5L | 164O03          | 10.2%  | 7.9  |    |
| 5L | 091D14          | 18.8%  | 8.5  |    |
| 5L | 033M02          | 27.6%  | 9.2  |    |
| 5L | 002J04          | 27.8%  | 9.2  | S1 |
| 5L | SL_s0031L05     | 29.5%  | 9.3  | S2 |
| 5L | SL_s0084H11     | 32.4%  | 9.5  | S2 |
| 5L | 016D20          | 34.1%  | 9.7  | S3 |
| 5L | SL_EcoRI0012L12 | 34.1%  | 9.7  |    |
| 5L | Eu/Het border   | 40.0%  | 10.1 |    |
| 5L | 006D05          | 43.4%  | 10.4 |    |
| 5L | 169M21          | 62.6%  | 11.8 |    |
| 5L | 138J03          | 72.4%  | 12.5 |    |
| 5L | 100I16          | 95.5%  | 14.3 |    |
| 5L | 251J13          | 98.0%  | 14.5 |    |
| 5L | SL_EcoRI0004N07 | 99.3%  | 14.5 | S3 |
| 5L | Telomere        | 100.0% | 14.6 |    |
| 6S | Telomere        | 100.0% | 0.0  |    |
| 6S | SL_Mbol0032G06  | 98.8%  | 0.0  | S1 |
| 6S | 251G05          | 76.6%  | 0.9  |    |
| 6S | 250I21          | 63.7%  | 1.3  |    |
| 6S | 024L21          | 61.4%  | 1.4  |    |

|           |                       |              |            |
|-----------|-----------------------|--------------|------------|
| 6S        | 095C08                | 56.8%        | 1.6        |
| 6S        | SL_Mbol0134P07        | 51.8%        | 1.8        |
| <b>6S</b> | <b>Eu/Het border</b>  | <b>49.0%</b> | <b>1.9</b> |
| 6S        | 008F19                | 48.9%        | 1.9        |
| 6S        | 097D13                | 39.4%        | 2.2        |
| <b>6S</b> | <b>028K02</b>         | <b>36.4%</b> | <b>2.4</b> |
| 6S        | SL_EcoRI0056L08       | 32.6%        | 2.5        |
| 6S        | SL_EcoRI0047D19       | 31.7%        | 2.5        |
| 6S        | SL_EcoRI0005K11       | 30.9%        | 2.6        |
| 6S        | SL_EcoRI0031A01       | 30.8%        | 2.6        |
| 6S        | SL_EcoRI0035D19       | 30.5%        | 2.6        |
| 6S        | SL_Mbol0049I18        | 29.8%        | 2.6        |
| 6S        | LE_HBa0029E01         | 29.6%        | 2.6        |
| 6S        | 027D17                | 28.9%        | 2.6        |
| 6S        | 176D13                | 28.7%        | 2.6        |
| 6S        | 078K13                | 28.7%        | 2.6        |
| 6S        | 002P09                | 28.6%        | 2.6        |
| 6S        | SL_Mbol0016K18        | 28.1%        | 2.7        |
| <b>6S</b> | <b>025N04</b>         | <b>27.8%</b> | <b>2.7</b> |
| 6S        | SL_EcoRI0021L01       | 27.6%        | 2.7        |
| 6S        | 001E08                | 27.3%        | 2.7        |
| 6S        | IGS-derived satellite | 27.1%        | 2.7        |
| <b>6S</b> | <b>SL_Mbol0029F23</b> | <b>26.4%</b> | <b>2.7</b> |
| 6S        | SL_EcoRI0013G12       | 25.8%        | 2.7        |

**S1**

**S3**

**S3**



|    |                 |       |      |    |
|----|-----------------|-------|------|----|
| 6S | SL_EcoRI0040C12 | 23.9% | 2.8  | S2 |
| 6S | SL_MboI0081L19  | 17.7% | 3.0  |    |
| 6S | 068M22          | 15.2% | 4.6  |    |
| 6S | 057J04          | 2.7%  | 3.3  |    |
|    | Centromere      | 0.0%  | 3.7  |    |
| 6L | SL_EcoRI0013C07 | 3.4%  | 4.1  | S2 |
| 6L | SL_MboI0029C07  | 3.9%  | 4.2  | S4 |
| 6L | 031J01          | 5.6%  | 4.4  |    |
| 6L | SL_MboI0034N14  | 6.1%  | 4.5  |    |
| 6L | 188N10          | 13.2% | 5.4  |    |
| 6L | SL_EcoRI0009J17 | 16.5% | 5.8  | S4 |
| 6L | SL_EcoRI0033O20 | 16.7% | 5.8  | S5 |
| 6L | SL_MboI0018M19  | 16.9% | 5.8  |    |
| 6L | SL_EcoRI0040G06 | 17.7% | 5.9  |    |
| 6L | 031J01          | 17.9% | 6.0  | S5 |
| 6L | SL_MboI0034N14  | 18.1% | 6.0  | S6 |
| 6L | SL_MboI0029D03  | 18.7% | 6.1  |    |
| 6L | SL_EcoRI0001M14 | 19.8% | 6.2  |    |
| 6L | SL_EcoRI0027F24 | 19.9% | 6.2  |    |
| 6L | 055B14          | 20.9% | 6.3  |    |
| 6L | Eu/Het border   | 21.0% | 6.4  |    |
| 6L | SL_EcoRI0023E10 | 37.1% | 8.4  | S6 |
| 6L | SL_EcoRI0018M04 | 39.2% | 8.7  | S7 |
| 6L | SL_MboI0030C09  | 57.0% | 10.9 |    |

|           |                        |              |             |           |
|-----------|------------------------|--------------|-------------|-----------|
| 6L        | 081D06                 | 60.1%        | 11.3        |           |
| 6L        | 146O07                 | 80.6%        | 13.9        |           |
| <b>6L</b> | <b>SL_EcoRI0008B16</b> | <b>88.2%</b> | <b>14.9</b> | <b>S7</b> |
| <b>6L</b> | <b>LE_HBa0025F06</b>   | <b>90.0%</b> | <b>15.1</b> | <b>S8</b> |
| 6L        | 068M14                 | 91.0%        | 15.3        |           |
| 6L        | 184G14                 | 96.1%        | 15.9        |           |
| 6L        | 098L02                 | 98.1%        | 16.2        |           |
| <b>6L</b> | <b>SL_EcoRI0019F04</b> | <b>99.5%</b> | <b>16.3</b> | <b>S8</b> |
| 6L        | Telomere               | 100.0%       | 16.4        |           |
| 7S        | Telomere               | 100.0%       | 0.0         |           |
| 7S        | 193E01                 | 99.1%        | 0.1         |           |
| <b>7S</b> | <b>SL_EcoRI0006L14</b> | <b>98.0%</b> | <b>0.1</b>  | <b>S1</b> |
| 7S        | 002D20                 | 97.5%        | 0.1         |           |
| 7S        | 095C18                 | 97.1%        | 0.2         |           |
| 7S        | 007H24                 | 96.6%        | 0.2         |           |
| 7S        | 111F22                 | 95.5%        | 0.3         |           |
| 7S        | 150H03                 | 94.5%        | 0.3         |           |
| 7S        | SL_EcoRI0042G10        | 83.0%        | 1.0         |           |
| 7S        | SL_EcoRI0025E06        | 57.1%        | 2.4         |           |
| 7S        | SL_Mbol0137E08         | 52.0%        | 2.7         |           |
| 7S        | 173A21                 | 50.2%        | 2.8         |           |
| 7S        | SL_EcoRI0008H22        | 47.2%        | 3.0         |           |
| 7S        | SL_Mbol0024O10         | 46.3%        | 3.0         |           |
| 7S        | 325D07                 | 44.0%        | 3.1         |           |

|           |                        |              |            |           |
|-----------|------------------------|--------------|------------|-----------|
| 7S        | Eu/Het border          | 40.0%        | 3.4        |           |
| 7S        | 293I23                 | 33.0%        | 3.8        |           |
|           | Centromere             | 0.0%         | 5.6        |           |
| <b>7L</b> | <b>SL_Mbol0016H01</b>  | <b>10.0%</b> | <b>6.6</b> | <b>S1</b> |
| <b>7L</b> | <b>032J14</b>          | <b>10.6%</b> | <b>6.7</b> | <b>S2</b> |
| 7L        | 003K20                 | 13.6%        | 7.0        |           |
| 7L        | 082D04                 | 15.4%        | 7.2        |           |
| 7L        | 027F11                 | 19.3%        | 7.6        |           |
| 7L        | SL_EcoRI0021M11        | 19.5%        | 7.6        |           |
| <b>7L</b> | <b>SL_EcoRI0016C19</b> | <b>19.7%</b> | <b>7.6</b> | <b>S2</b> |
| 7L        | SL_EcoRI0041L20        | 19.9%        | 7.6        |           |
| 7L        | SL_EcoRI0041L23        | 19.9%        | 7.6        |           |
| 7L        | 042K23                 | 20.5%        | 7.7        |           |
| 7L        | 036D05                 | 21.1%        | 7.8        |           |
| 7L        | 025A06                 | 21.3%        | 7.8        |           |
| 7L        | SL_Mbol0017P20         | 21.5%        | 7.8        |           |
| 7L        | SL_Mbol0017I04         | 21.5%        | 7.8        |           |
| <b>7L</b> | <b>001O15</b>          | <b>22.5%</b> | <b>7.9</b> | <b>S3</b> |
| 7L        | 012C17                 | 23.1%        | 8.0        |           |
| 7L        | 034B22                 | 27.8%        | 8.5        |           |
| 7L        | 188B22                 | 29.9%        | 8.7        |           |
| 7L        | 224G23                 | 32.1%        | 8.9        |           |
| <b>7L</b> | <b>Eu/Het border</b>   | <b>34.0%</b> | <b>9.1</b> |           |
| 7L        | 041L08                 | 36.3%        | 9.3        |           |

|           |                        |              |             |           |
|-----------|------------------------|--------------|-------------|-----------|
| 7L        | 106F06                 | 38.4%        | 9.6         |           |
| 7L        | SL_Mbol0141H03         | 40.5%        | 9.8         |           |
| 7L        | SL_EcoRI0101G19        | 42.5%        | 10.0        |           |
| 7L        | SL_EcoRI0095F20        | 75.0%        | 13.3        |           |
| <b>7L</b> | <b>SL_EcoRI0032D11</b> | <b>77.5%</b> | <b>13.6</b> | <b>S3</b> |
| <b>7L</b> | <b>024C10</b>          | <b>78.8%</b> | <b>13.7</b> | <b>S4</b> |
| 7L        | 308M01                 | 83.0%        | 14.1        |           |
| 7L        | 079F09                 | 84.0%        | 14.2        |           |
| 7L        | 227C07                 | 86.2%        | 14.5        |           |
| 7L        | 178O02                 | 88.7%        | 14.7        |           |
| 7L        | 130B18                 | 89.0%        | 14.8        |           |
| 7L        | 226J04                 | 89.4%        | 14.8        |           |
| 7L        | 059P18                 | 90.3%        | 14.9        |           |
| 7L        | 261J23                 | 91.9%        | 15.1        |           |
| 7L        | 167K07                 | 98.0%        | 15.7        |           |
| 7L        | 179K09                 | 98.0%        | 15.7        |           |
| <b>7L</b> | <b>SL_Mbol0017L19</b>  | <b>98.2%</b> | <b>15.7</b> | <b>S4</b> |
| 7L        | 215P04                 | 99.7%        | 15.9        |           |
| 7L        | Telomere               | 100.0%       | 15.9        |           |
| 8S        | Telomere               | 100.0%       | 0.0         |           |
| <b>8S</b> | <b>030O09</b>          | <b>98.5%</b> | <b>0.1</b>  | <b>S1</b> |
| 8S        | 025I17                 | 87.1%        | 0.6         |           |
| 8S        | 216M19                 | 85.9%        | 0.7         |           |
| 8S        | 270A17                 | 82.8%        | 0.8         |           |

|    |                       |       |     |    |
|----|-----------------------|-------|-----|----|
| 8S | 008J16                | 68.5% | 1.5 | S1 |
| 8S | 015E06                | 62.8% | 1.8 | S2 |
| 8S | Eu/Het border         | 45.0% | 2.7 |    |
| 8S | 009K19                | 38.5% | 3.0 | S2 |
| 8S | SL_EcoRI0002D11       | 36.5% | 3.1 |    |
| 8S | LE_HBa0041G04         | 35.7% | 3.2 |    |
| 8S | SL_Mbol0012I24        | 35.2% | 3.2 | S7 |
| 8S | SL_Mbol0041D13        | 34.9% | 3.2 |    |
| 8S | IGS-derived satellite | 34.6% | 3.2 |    |
| 8S | SL_s0093G06           | 33.0% | 3.3 | S5 |
| 8S | SL_s0030B23           | 28.3% | 3.5 | S5 |
| 8S | SL_s0105O13           | 27.4% | 3.6 | S6 |
|    | Centromere            | 0.0%  | 4.9 |    |
| 8L | SL_EcoRI0008F12       | 3.1%  | 5.3 |    |
| 8L | SL_Mbol0012P13        | 3.7%  | 5.3 |    |
| 8L | SL_Mbol0005G10        | 7.7%  | 5.8 | S6 |
| 8L | SL_s0078C24           | 8.0%  | 5.8 | S3 |
| 8L | 213E05                | 11.8% | 6.3 |    |
| 8L | SL_s0058J24           | 17.0% | 6.9 | S3 |
| 8L | SL_EcoRI0024O12       | 18.2% | 7.0 | S4 |
| 8L | 034L18                | 23.4% | 7.6 |    |
| 8L | SL_Mbol0019D14        | 24.6% | 7.8 | S4 |
| 8L | SL_Mbol0012P13        | 25.7% | 7.9 |    |
| 8L | 033A16                | 26.0% | 7.9 | S8 |

|    |                 |       |     |
|----|-----------------|-------|-----|
| 8L | 027D09          | 27.6% | 8.1 |
| 8L | SL_EcoRI0027A06 | 31.4% | 8.6 |
| 8L | SL_EcoRI0039B17 | 32.0% | 8.6 |
| 8L | Eu/Het border   | 32.0% | 8.6 |
| 8L | 160L02          | 32.1% | 8.7 |
| 8L | 225C20          | 33.1% | 8.8 |
| 8L | 076I13          | 38.3% | 9.4 |

8L Chromomere 58.6% 11.8

8L SL\_Mbol0007C12 58.7% 11.8 S8

8L SL\_s0082B11 60.2% 11.9 S9

|    |                 |        |      |
|----|-----------------|--------|------|
| 8L | 005L01          | 99.6%  | 16.6 |
| 8L | SL_EcoRI0040H01 | 99.7%  | 16.6 |
| 8L | Telomere        | 100.0% | 16.6 |
| 9S | Telomere        | 100.0% | 0.0  |
| 9S | SL_Mbol0032A02  | 99.4%  | 0.0  |
| 9S | 026I24          | 99.3%  | 0.0  |
| 9S | 072G22          | 88.9%  | 0.6  |
| 9S | 116C14          | 84.9%  | 0.8  |

9S 168F14 77.9% 1.2

9S 203J14 77.6% 1.3

9S 300E15 64.5% 2.0

9S 026P14 63.4% 2.1

9S 255E01 56.9% 2.4

9S SL\_Mbol0080E11 48.9% 2.9

9S 300E15 47.5% 2.9

9S 026P14 47.3% 3.0

|    |                 |       |      |    |
|----|-----------------|-------|------|----|
| 9S | 308C20          | 41.6% | 3.3  |    |
| 9S | Eu/Het border   | 40.0% | 3.4  |    |
| 9S | 197E10          | 28.3% | 4.0  |    |
| 9S | SL_MboI0056H18  | 9.4%  | 5.1  |    |
| 9S | 072H18          | 6.6%  | 5.2  |    |
| 9S | SL_MboI0025N23  | 5.8%  | 5.3  | S1 |
| 9S | SL_MboI0045G03  | 3.4%  | 5.4  |    |
| 9S | SL_EcoRI0052D12 | 3.4%  | 5.4  |    |
| 9S | SL_EcoRI0015A15 | 2.3%  | 5.5  | S4 |
|    | Centromere      | 0.0%  | 5.6  |    |
| 9L | SL_EcoRI0025E12 | 7.2%  | 6.3  | S4 |
| 9L | SL_EcoRI0018E08 | 8.2%  | 6.4  | S3 |
| 9L | 061J21          | 11.0% | 6.7  |    |
| 9L | 075M11          | 11.8% | 6.8  |    |
| 9L | LE_HBa0005G01   | 13.5% | 7.0  | S3 |
| 9L | SL_MboI0013P10  | 15.0% | 7.1  | S5 |
| 9L | SL_EcoRI0022O16 | 15.3% | 7.2  | S5 |
| 9L | SL_MboI0018I03  | 16.9% | 7.3  | S6 |
| 9L | 107D15          | 31.3% | 8.8  |    |
| 9L | Eu/Het border   | 34.0% | 9.1  |    |
| 9L | 099F14          | 61.2% | 11.9 |    |
| 9L | LE_HBa0005M15   | 62.7% | 12.1 | S6 |

|           |                        |              |             |            |
|-----------|------------------------|--------------|-------------|------------|
| 9L        | 107P11                 | 63.7%        | 12.2        |            |
| <b>9L</b> | <b>SL_FOS0051C04</b>   | <b>64.2%</b> | <b>12.2</b> | <b>S2</b>  |
| <b>9L</b> | <b>SL_Mbol0019G06</b>  | <b>64.6%</b> | <b>12.3</b> | <b>S7</b>  |
| 9L        | 099P03                 | 70.7%        | 12.9        |            |
| 9L        | 278J12                 | 71.6%        | 13.0        |            |
| 9L        | 248I10                 | 72.3%        | 13.0        |            |
| <b>9L</b> | <b>SL_Mbol0020M04</b>  | <b>74.5%</b> | <b>13.3</b> | <b>S7</b>  |
| <b>9L</b> | <b>SL_Mbol0025N11</b>  | <b>77.9%</b> | <b>13.6</b> | <b>S8</b>  |
| <b>9L</b> | <b>LE_HBa0010F04</b>   | <b>81.6%</b> | <b>14.0</b> | <b>S8</b>  |
| <b>9L</b> | <b>LE_HBa0001I06</b>   | <b>82.7%</b> | <b>14.1</b> | <b>S9</b>  |
| 9L        | 245E05                 | 88.2%        | 14.7        |            |
| <b>9L</b> | <b>SL_EcoRI0024O21</b> | <b>91.9%</b> | <b>15.1</b> | <b>S9</b>  |
| <b>9L</b> | <b>SL_Mbol0037I08</b>  | <b>95.3%</b> | <b>15.4</b> | <b>S10</b> |

|            |                        |              |             |            |
|------------|------------------------|--------------|-------------|------------|
| 9L         | 165P17                 | 95.4%        | 15.4        |            |
| 9L         | 109D11                 | 97.5%        | 15.6        |            |
| <b>9L</b>  | <b>SL_Mbol0022L14</b>  | <b>99.2%</b> | <b>15.8</b> | <b>S10</b> |
| 9L         | SL_Mbol0042F10         | 99.6%        | 15.9        |            |
| 9L         | Telomere               | 100.0%       | 15.9        |            |
| 10S        | Telomere               | 100.0%       | 0.0         |            |
| <b>10S</b> | <b>SL_EcoRI0027L04</b> | <b>98.5%</b> | <b>0.1</b>  | <b>S1</b>  |
| 10S        | 060A06                 | 91.6%        | 0.4         |            |
| 10S        | 091N19                 | 88.4%        | 0.6         |            |
| 10S        | 012D17                 | 87.3%        | 0.6         |            |
| 10S        | 176H22                 | 87.2%        | 0.6         |            |



|     |                        |              |            |           |
|-----|------------------------|--------------|------------|-----------|
| 10S | 155I21                 | 76.8%        | 1.1        |           |
| 10S | 222H10                 | 75.4%        | 1.2        |           |
| 10S | SL_EcoRI0076M19        | 70.5%        | 1.4        |           |
| 10S | 028O04                 | 69.9%        | 1.4        |           |
| 10S | 041K23                 | 56.3%        | 2.1        |           |
| 10S | <b>SL_EcoRI0009D07</b> | <b>52.3%</b> | <b>2.3</b> | <b>S1</b> |
| 10S | <b>023E16</b>          | <b>51.7%</b> | <b>2.3</b> | <b>S2</b> |
| 10S | 201C12                 | 50.7%        | 2.4        |           |
| 10S | Eu/Het border          | 46.0%        | 2.6        |           |
| 10S | 205L07                 | 30.5%        | 3.3        |           |
| 10S | SL_MboI0020C04         | 27.5%        | 3.5        |           |
| 10S | 036L10                 | 23.2%        | 3.7        |           |
| 10S | 111D09                 | 19.1%        | 3.9        |           |
| 10S | 105C09                 | 17.5%        | 4.0        |           |
| 10S | SL_EcoRI0040D01        | 14.5%        | 4.1        |           |
| 10S | <b>SL_s0071N16</b>     | <b>11.3%</b> | <b>4.3</b> | <b>S2</b> |
| 10S | 237A02                 | 10.8%        | 4.3        |           |
| 10S | <b>SL_EcoRI0029F05</b> | <b>9.6%</b>  | <b>4.3</b> | <b>S4</b> |
|     | Centromere             | 0.0%         | 4.8        |           |
| 10L | <b>SL_MboI0011N01</b>  | <b>6.2%</b>  | <b>5.4</b> | <b>S4</b> |
| 10L | <b>SL_s0042K13</b>     | <b>6.5%</b>  | <b>5.5</b> | <b>S3</b> |
| 10L | 115K16                 | 10.8%        | 5.9        |           |
| 10L | 114B06                 | 16.6%        | 6.5        |           |
| 10L | 043B12                 | 26.3%        | 7.5        |           |

|            |                        |              |             |           |
|------------|------------------------|--------------|-------------|-----------|
| 10L        | 037N23                 | 26.4%        | 7.5         |           |
| 10L        | Eu/Het border          | 33.0%        | 8.1         |           |
| 10L        | 044O20                 | 39.6%        | 8.8         |           |
| 10L        | 045L17                 | 43.8%        | 9.2         |           |
| 10L        | 053L19                 | 49.1%        | 9.8         |           |
| <b>10L</b> | <b>SL_s0121P17</b>     | <b>53.2%</b> | <b>10.2</b> | <b>S3</b> |
| <b>10L</b> | <b>SL_FOS0014E24</b>   | <b>54.3%</b> | <b>10.3</b> | <b>S5</b> |
| <b>10L</b> | <b>SL_EcoRI0036N16</b> | <b>55.3%</b> | <b>10.4</b> | <b>S6</b> |
| 10L        | SL_EcoRI0013B18        | 56.3%        | 10.5        |           |
| 10L        | 204I05                 | 57.7%        | 10.6        |           |
| 10L        | 189B10                 | 58.5%        | 10.7        |           |
| 10L        | 022B11                 | 58.7%        | 10.7        |           |
| 10L        | 044H12                 | 61.7%        | 11.0        |           |
| 10L        | 188N09                 | 62.1%        | 11.1        |           |
| 10L        | 071D20                 | 62.9%        | 11.1        |           |
| 10L        | 020A12                 | 63.1%        | 11.2        |           |
| 10L        | 248A13                 | 63.5%        | 11.2        |           |
| 10L        | 234C10                 | 64.1%        | 11.3        |           |
| 10L        | 156C03                 | 64.6%        | 11.3        |           |
| 10L        | 057G01                 | 71.3%        | 12.0        |           |
| 10L        | 206B16                 | 71.8%        | 12.0        |           |
| 10L        | 005D06                 | 76.1%        | 12.5        |           |
| 10L        | 256L16                 | 78.5%        | 12.7        |           |
| 10L        | 021O12                 | 79.2%        | 12.8        |           |

|            |                        |              |             |           |
|------------|------------------------|--------------|-------------|-----------|
| 10L        | 334K22                 | 82.8%        | 13.2        |           |
| 10L        | 049K02                 | 86.1%        | 13.5        |           |
| 10L        | 011E16                 | 89.9%        | 13.9        |           |
| 10L        | 181E17                 | 94.7%        | 14.4        |           |
| 10L        | 013B20                 | 96.0%        | 14.5        |           |
| <b>10L</b> | <b>SL_EcoRI0008A07</b> | <b>99.6%</b> | <b>14.9</b> | <b>S6</b> |
| 10L        | Telomere               | 100.0%       | 14.9        |           |
| 11S        | Telomere               | 100.0%       | 0.0         |           |
| <b>11S</b> | <b>SL_s0029B21</b>     | <b>98.6%</b> | <b>0.1</b>  | <b>S1</b> |
| 11S        | 168B23                 | 97.2%        | 0.2         |           |
| 11S        | 024K09                 | 63.9%        | 2.3         |           |
| 11S        | 027B05                 | 63.6%        | 2.4         |           |
| 11S        | 015A13                 | 58.0%        | 2.7         |           |
| 11S        | SL_MboI121I03          | 42.2%        | 3.8         |           |
| 11S        | 034I10                 | 41.8%        | 3.8         |           |
| 11S        | 214E16                 | 41.4%        | 3.8         |           |
| 11S        | 080C09                 | 41.0%        | 3.8         |           |
| 11S        | 128G07                 | 40.5%        | 3.9         |           |
| 11S        | 064J13                 | 39.9%        | 3.9         |           |
| 11S        | 291F09                 | 39.2%        | 4.0         |           |
| 11S        | SL_MboI0052K14         | 37.7%        | 4.1         |           |
| 11S        | Eu/Het border          | 32.0%        | 4.4         |           |
| <b>11S</b> | <b>SL_EcoRI0018D15</b> | <b>17.9%</b> | <b>5.3</b>  | <b>S1</b> |
| <b>11S</b> | <b>008F06</b>          | <b>16.7%</b> | <b>5.4</b>  | <b>S4</b> |

|     |                       |       |      |    |
|-----|-----------------------|-------|------|----|
| 11S | 023H04                | 13.7% | 5.6  |    |
| 11S | 004F15                | 11.7% | 5.7  | S4 |
| 11S | IGS-derived satellite | 11.0% | 5.8  |    |
| 11S | SL_s0082L15           | 10.1% | 5.8  | S2 |
|     | Centromere            | 0.0%  | 6.5  |    |
| 11L | 305L18                | 6.6%  | 7.0  |    |
| 11L | 187P23                | 7.4%  | 7.1  |    |
| 11L | SL_EcoRI0045G19       | 8.0%  | 7.1  |    |
| 11L | SL_EcoRI0027A06       | 12.6% | 7.5  |    |
| 11L | 001N12                | 13.7% | 7.6  | S2 |
| 11L | SL_MboI0047F15        | 14.3% | 7.6  |    |
| 11L | 062E02                | 15.2% | 7.7  |    |
| 11L | SL_EcoRI0031L09       | 16.2% | 7.8  | S3 |
| 11L | Eu/Het border         | 43.0% | 9.9  |    |
| 11L | SL_s0045H10           | 44.4% | 10.1 | S3 |
| 11L | SL_s0084O21           | 45.6% | 10.1 | S5 |
| 11L | Mitochondrial DNA     | 47.3% | 10.3 |    |
| 11L | SL_s0017L16           | 48.1% | 10.3 | S5 |
| 11L | SL_s0105E01           | 50.4% | 10.5 | S6 |
| 11L | 245M17                | 50.7% | 10.6 |    |
| 11L | 158K02                | 51.5% | 10.6 |    |
| 11L | 119D16                | 56.6% | 11.0 |    |
| 11L | 316E10                | 58.3% | 11.2 |    |
| 11L | 249E07                | 66.8% | 11.8 |    |

|            |                        |              |             |           |
|------------|------------------------|--------------|-------------|-----------|
| 11L        | 323E19                 | 88.2%        | 13.6        |           |
| <b>11L</b> | <b>SL_s0014A19</b>     | <b>98.3%</b> | <b>14.4</b> | <b>S6</b> |
| 11L        | Telomere               | 100.0%       | 14.5        |           |
| 12S        | Telomere               | 100.0%       | 0.0         |           |
| <b>12S</b> | <b>SL_Mbol0030P17</b>  | <b>99.3%</b> | <b>0.0</b>  | <b>S1</b> |
| 12S        | 045N22                 | 96.8%        | 0.2         |           |
| 12S        | 026C13                 | 93.7%        | 0.4         |           |
| 12S        | 163O04                 | 82.7%        | 1.2         |           |
| 12S        | 146I19                 | 78.9%        | 1.5         |           |
| 12S        | 049J09                 | 69.3%        | 2.2         |           |
| 12S        | 075A23                 | 67.9%        | 2.3         |           |
| 12S        | 180J10                 | 65.9%        | 2.4         |           |
| 12S        | 206N09                 | 64.7%        | 2.5         |           |
| 12S        | 105C12                 | 56.9%        | 3.1         |           |
| 12S        | 154D06                 | 50.4%        | 3.5         |           |
| 12S        | Eu/Het border          | 40.0%        | 4.3         |           |
| <b>12S</b> | <b>SL_EcoRI0005K14</b> | <b>38.9%</b> | <b>4.3</b>  | <b>S1</b> |
| <b>12S</b> | <b>LE_HBa0016B06</b>   | <b>37.9%</b> | <b>4.4</b>  | <b>S8</b> |
| 12S        | SL_Mbol0050G12         | 36.9%        | 4.5         |           |
| <b>12S</b> | <b>SL_Mbol0038L04</b>  | <b>36.3%</b> | <b>4.5</b>  | <b>S8</b> |
| 12S        | SL_EcoRI0010P04        | 35.8%        | 4.6         |           |
| <b>12S</b> | <b>SL_EcoRI0036O23</b> | <b>35.7%</b> | <b>4.6</b>  | <b>S7</b> |
| <b>12S</b> | <b>SL_EcoRI0003D15</b> | <b>31.1%</b> | <b>4.9</b>  | <b>S7</b> |
| <b>12S</b> | <b>SL_Mbol0008A07</b>  | <b>29.9%</b> | <b>5.0</b>  | <b>S2</b> |

|     |                 |       |      |                  |
|-----|-----------------|-------|------|------------------|
| 12S | 003H12          | 22.2% | 5.5  | S2               |
| 12S | SL_Mbol0023C14  | 21.0% | 5.6  | S6               |
| 12S | SL_EcoRI0004B02 | 18.9% | 5.8  | S6               |
| 12S | SL_Mbol0040D19  | 17.6% | 5.9  | S5               |
| 12S | SL_Mbol0019O03  | 7.7%  | 6.6  | S3               |
| 12S | 005D14          | 7.0%  | 6.6  |                  |
| 12S | SL_EcoRI0001K10 | 4.2%  | 6.8  | S5               |
| 12S | SL_EcoRI0012H19 | 3.4%  | 6.9  |                  |
| 12S | 012P02          | 0.0%  | 7.1  |                  |
|     | Centromere      | 0.0%  | 7.1  |                  |
| 12L | SL_EcoRI0012H19 | 2.2%  | 7.3  | Heinz<br>1706 S5 |
| 12L | 005D14          | 3.7%  | 7.4  | Heinz<br>1706 S3 |
| 12L | 153L10          | 7.4%  | 7.7  |                  |
| 12L | 148K11          | 16.1% | 8.3  |                  |
| 12L | 006G23          | 23.6% | 8.9  |                  |
| 12L | 047D08          | 27.6% | 9.2  |                  |
| 12L | SL_Mbol0009A03  | 29.5% | 9.3  |                  |
| 12L | SL_Mbol0128K09  | 31.6% | 9.5  |                  |
| 12L | 331D02          | 32.1% | 9.5  |                  |
| 12L | 152A18          | 35.4% | 9.8  |                  |
| 12L | Eu/Het border   | 40.0% | 10.1 |                  |
| 12L | SL_Mbol0035N06  | 60.2% | 11.6 | S3               |
| 12L | SL_Mbol0006L17  | 61.0% | 11.7 | S4               |

|            |                        |              |             |            |
|------------|------------------------|--------------|-------------|------------|
| <b>12L</b> | <b>017P17</b>          | <b>65.1%</b> | <b>12.0</b> | <b>S4</b>  |
| 12L        | 079O22                 | 66.6%        | 12.1        |            |
| 12L        | SL_MboI0011A16         | 69.3%        | 12.3        |            |
| <b>12L</b> | <b>SL_EcoRI0031M18</b> | <b>73.1%</b> | <b>12.6</b> | <b>S9</b>  |
| 12L        | 012E19                 | 76.4%        | 12.8        |            |
| <b>12L</b> | <b>SL_EcoRI0024H05</b> | <b>79.0%</b> | <b>13.0</b> | <b>S9</b>  |
| <b>12L</b> | <b>LE_HBa0029L21</b>   | <b>80.6%</b> | <b>13.1</b> | <b>S10</b> |
| 12L        | SL_EcoRI0045D23        | 81.0%        | 13.2        |            |
| 12L        | 326K10                 | 82.4%        | 13.3        |            |
| 12L        | 093P12                 | 87.0%        | 13.6        |            |

|            |                      |              |             |            |
|------------|----------------------|--------------|-------------|------------|
| 12L        | 055G18               | 95.7%        | 14.3        |            |
| 12L        | 116D04               | 97.9%        | 14.4        |            |
| <b>12L</b> | <b>LE_HBa0030J22</b> | <b>98.7%</b> | <b>14.5</b> | <b>S10</b> |
| 12L        | Telomere             | 100.0%       | 14.6        |            |
|            |                      |              |             |            |
