# Supplementary material for: Fluorescence In Situ Hybridization and Optical Mapping to Correct Scaffold Arrangement in the Tomato Genome
Source: PubMed Central journal article supplement (PMC4132171; doi:10.1534/g3.114.011197), 2014-05-30
Supplement: supp_g3.114.011197_TableS4.pdf [file supp_g3.114.011197_TableS4.pdf]

**Table S4 FISH-based scaffold order, orientation, size, and chromatin type**

| Chr. | Scaffold Name <sup>1,2</sup> | Scaffold Number <sup>2,3</sup> | Left (head) <sup>4</sup><br>BAC Probe <sup>5</sup> | Right (tail) <sup>4</sup><br>BAC Probe <sup>5</sup> | Scaffold Size (Mb) <sup>6</sup> | SC len. (μm)     | Chromatin Type <sup>11</sup> |
|------|------------------------------|--------------------------------|----------------------------------------------------|-----------------------------------------------------|---------------------------------|------------------|------------------------------|
| 1    | SL2.40sc04133                | 1                              | s090M22                                            | M034D03                                             | 33.0                            | 5.8              | Eu/Het                       |
| 1    | SL2.40sc04191                | 3                              | s053P14                                            | s083L21                                             | 1.7                             | 0.2              | Het                          |
| 1    | SL2.40sc03666                | 2                              | E016I11                                            | H033N15                                             | 2.6                             | 0.2              | Het                          |
| 1    | SL2.40sc03594                | 4                              | s006A13                                            | s042B18                                             | 6.3                             | 0.7              | Het                          |
| 1    | SL2.40sc05010                | 5                              | s042O02                                            | H037N04                                             | 20.5                            | 2.9              | Het/Border                   |
| 1    | SL2.40sc05941                | 6                              | s040G18                                            | E021C24                                             | 6.2                             | 1.7              | Eu/Border                    |
| 1    | SL2.40sc06903                | 8                              | s022L14                                            | s121I01                                             | 2.7                             | 1.1              | Eu                           |
| 1    | SL2.40sc06917                | 7                              | s071P10                                            | n/a <sup>7</sup>                                    | 0.4                             | n/a              | Eu                           |
| 1    | SL2.40sc04323                | 9                              | s024J19                                            | M028C09                                             | 17.0                            | 12.6             | Eu                           |
| 2    | SL2.40sc04732                | 4                              | E007F19                                            | E008B15                                             | 1.7                             | 0.2              | Het                          |
| 2    | SL2.40sc04208                | 6                              | s053E24                                            | s044P10                                             | 1.4                             | 0.2              | Het                          |
| 2    | SL2.40sc05776                | 5                              | H011G24                                            | M036C03                                             | 2.1                             | 0.5              | Het                          |
| 2    | SL2.40sc06593                | 1                              | s056I16                                            | s079J24                                             | 4.0                             | 0.5              | Het                          |
| 2    | SL2.40sc04142                | 2                              | s053C07                                            | s050E09                                             | 6.5                             | 1.5              | Het/Cent                     |
| 2    | SL2.40sc03766                | 3                              | M021A03                                            | E034J17                                             | 11.7                            | 2.5              | Het/Border                   |
| 2    | SL2.40sc03665                | 7                              | s101F18                                            | M017J13                                             | 22.4                            | 15.3             | Eu                           |
| 3    | SL2.40sc04439                | 1                              | s009C01                                            | s086D22                                             | 2.5                             | 1.4              | Eu                           |
| 3    | SL2.40sc04696                | 4                              | s018K15                                            | s002G24                                             | 1.3                             | 0.5              | Eu                           |
| 3    | SL2.40sc05330                | 5                              | s050E05                                            | H037B06                                             | 2.6                             | 0.9              | Eu/Border                    |
| 3    | SL2.40sc04126                | 6                              | H020G20                                            | H039C15                                             | 6.5                             | 0.9              | Het/Border                   |
| 3    | SL2.40sc04616                | 9                              | M079O10                                            | M002J15                                             | 3.1                             | 0.6              | Cent/Het                     |
| 3    | SL2.40sc06725                | 7                              | H244B01                                            | E121G21                                             | 3.0                             | 0.3              | Het                          |
| 3    | SL2.40sc04704                | 8                              | H027L13                                            | s071G06                                             | 18.6                            | 2.2 <sup>8</sup> | Het                          |
| 3    | SL2.40sc03721                | 12                             | E018K21                                            | H028L03                                             | 1.1                             | 0.0 <sup>8</sup> | Het/Border                   |
| 3    | SL2.40sc04822                | 2                              | s042B23                                            | H030A19                                             | 4.1                             | 0.5 <sup>8</sup> | Het/Border                   |
| 3    | SL2.40sc03806                | 10                             | H011C02                                            | H001H05                                             | 5.5                             | 1.8 <sup>8</sup> | Border/Eu                    |
| 3    | SL2.40sc03796                | 11                             | M003H09                                            | E031G05                                             | 7.0                             | 2.4              | Eu                           |
| 3    | SL2.40sc06911                | 3                              | M015G06                                            | s048H23                                             | 0.4                             | 0.0              | Eu                           |
| 3    | SL2.40sc03701                | 13                             | E006F17                                            | E034G21                                             | 9.2                             | 6.2              | Eu                           |
| 4    | SL2.40sc03604                | 1                              | M035I14                                            | H012B20                                             | 11.6                            | 4.2              | Eu/Het                       |
| 4    | SL2.40sc05339                | 3                              | E036C15                                            | H018I03                                             | 2.0                             | 0.6              | Het/Cent                     |
| 4    | SL2.40sc03683                | 2                              | M036H17                                            | M016J15                                             | 17.6                            | 2.5              | Cent/Het                     |
| 4    | SL2.40sc06101                | 4                              | M038M16                                            | M029O16                                             | 23.3                            | 4.6              | Het/Eu                       |
| 4    | SL2.40sc04680                | 5                              | H013P02                                            | M018D12                                             | 0.8                             | 0.4              | Eu                           |

|    |               |    |         |                  |                  |     |             |
|----|---------------|----|---------|------------------|------------------|-----|-------------|
| 4  | SL2.40sc04135 | 6  | H020C13 | M023M21          | 8.8              | 5.2 | Eu          |
| 5  | SL2.40sc03726 | 1  | s094J05 | H002J04          | 42.1             | 9.1 | Eu/Het/Cent |
| 5  | SL2.40sc06155 | 2  | s031L05 | s084H11          | 4.3              | 0.2 | Het         |
| 5  | SL2.40sc03902 | 3  | H016D20 | E004N07          | 18.6             | 4.9 | Eu/Het      |
| 6  | SL2.40sc04474 | 1  | M032G6  | H028K02          | 8.6              | 2.3 | Eu/Het      |
| 6  | SL2.40sc06140 | 3  | H025N04 | M029F23          | 0.7              | 0.1 | Het         |
| 6  | SL2.40sc05383 | 2  | E040C12 | E013C07          | 6.1              | 1.3 | Het/Cent    |
| 6  | SL2.40sc04279 | 4  | M029C07 | E009J17          | 9.6              | 1.6 | Het         |
| 6  | SL2.40sc05188 | 5  | E033O20 | H031J01          | 2.4              | 0.2 | Border      |
| 6  | SL2.40sc05732 | 6  | M034N10 | E023E10          | 6.6              | 2.4 | Border/Eu   |
| 6  | SL2.40sc05054 | 7  | E018M04 | E008B16          | 10.3             | 6.2 | Eu          |
| 6  | SL2.40sc03622 | 8  | H025F06 | E019F04          | 1.8              | 1.2 | Eu          |
| 7  | SL2.40sc03731 | 1  | E006L14 | M016H01          | 33.3             | 6.5 | Eu/Het/Cent |
| 7  | SL2.40sc05397 | 2  | H032J14 | E016C19          | 8.0              | 0.9 | Het         |
| 7  | SL2.40sc03685 | 3  | H001O15 | E032D11          | 20.7             | 5.7 | Het/Eu      |
| 7  | SL2.40sc04626 | 4  | H024C01 | M017L19          | 3.4              | 2.0 | Eu          |
| 8  | SL2.40sc04813 | 1  | H030O09 | H008J16          | 3.0              | 1.5 | Eu          |
| 8  | SL2.40sc03770 | 2  | H015E06 | H009K19          | 6.3              | 1.2 | Eu/Border   |
| 8  | SL2.40sc04167 | 7  | M012I24 | n/a <sup>7</sup> | 0.2              | n/a | Het         |
| 8  | SL2.40sc03749 | 5  | s093G06 | s030B23          | 1.5              | 0.2 | Het         |
| 8  | SL2.40sc04236 | 6  | s105O13 | M005G10          | 14.6             | 2.2 | Het/Cent    |
| 8  | SL2.40sc03835 | 3  | s078C24 | s058J24          | 8.4              | 1.1 | Het         |
| 8  | SL2.40sc04701 | 4  | E024O12 | M019D14          | 7.0              | 0.7 | Het         |
| 8  | SL2.40sc04948 | 8  | H033A16 | M007C12          | 14.4             | 3.8 | Eu/Het      |
| 8  | SL2.40sc03923 | 9  | s082B11 | E040H01          | 7.5              | 4.6 | Eu          |
| 9  | SL2.40sc03771 | 1  | M032A02 | M025N23          | 19.2             | 5.2 | Eu/Het      |
| 9  | SL2.40sc04008 | 4  | E015A15 | E025E12          | 5.2              | 0.9 | Het/Cent    |
| 9  | SL2.40sc04950 | 3  | E018E08 | M005G01          | 5.8              | 0.5 | Het         |
| 9  | SL2.40sc04785 | 5  | M013P10 | E022O16          | 2.0              | 0.0 | Het         |
| 9  | SL2.40sc04777 | 6  | M018I03 | H005M15          | 28.2             | 4.7 | Eu/Het      |
| 9  | SL2.40sc06916 | 2  | F051C04 | n/a <sup>7</sup> | 0.0 <sup>9</sup> | n/a | Eu          |
| 9  | SL2.40sc05269 | 7  | M019G06 | M020M04          | 2.7              | 1.0 | Eu          |
| 9  | SL2.40sc03852 | 8  | M025N11 | H010F04          | 1.3              | 0.4 | Eu          |
| 9  | SL2.40sc04828 | 9  | H001I06 | E024O21          | 2.5              | 0.9 | Eu          |
| 9  | SL2.40sc06214 | 10 | M037I08 | M022L14          | 0.6              | 0.4 | Eu          |
| 10 | SL2.40sc05925 | 1  | E027L04 | E009D07          | 5.4              | 2.2 | Eu/Border   |
| 10 | SL2.40sc03798 | 2  | H023E16 | s071N16          | 16.5             | 1.9 | Het         |
| 10 | SL2.40sc04872 | 4  | E029F05 | M011N01          | 3.9              | 1.1 | Cent        |
| 10 | SL2.40sc05632 | 3  | s042K13 | s121P17          | 31.1             | 4.7 | Eu/Het      |

|        |                             |    |         |                  |       |       |            |
|--------|-----------------------------|----|---------|------------------|-------|-------|------------|
| 10     | SL2.40sc04534               | 5  | F014E24 | n/a <sup>7</sup> | 0.1   | n/a   | Eu         |
| 10     | SL2.40sc04199               | 6  | E036N16 | E008A07          | 8.0   | 4.5   | Eu         |
| 11     | SL2.40sc03748               | 1  | s029B21 | E018D15          | 15.2  | 5.2   | Eu/Het     |
| 11     | SL2.40sc06763               | 4  | H008F06 | H004F15          | 2.5   | 0.3   | Het        |
| 11     | SL2.40sc04054               | 2  | s082L15 | H001N12          | 8.0   | 1.8   | Het/Cent   |
| 11     | SL2.40sc03752               | 3  | E031L09 | s045H10          | 17.4  | 2.3   | Het/Border |
| 11     | SL2.40sc06137               | 5  | s084O21 | s017L16          | 2.1   | 0.2   | Border     |
| 11     | SL2.40sc03876               | 6  | s105E01 | s014A19          | 8.2   | 3.8   | Eu         |
| 12     | SL2.40sc04607               | 1  | M030P17 | E005K14          | 16.1  | 4.3   | Eu/Border  |
| 12     | SL2.40sc06147               | 8  | H016B06 | M038L04          | 1.2   | 0.1   | Border     |
| 12     | SL2.40sc04039               | 7  | E036O23 | E003D15          | 4.9   | 0.3   | Border     |
| 12     | SL2.40sc04878               | 2  | M008A07 | H003H12          | 5.7   | 0.5   | Het        |
| 12     | SL2.40sc04266               | 6  | M023C14 | E004B02          | 1.3   | 0.1   | Het        |
| 12     | SL2.40sc04757 <sup>10</sup> | 5  | M040D19 | E012H19          | 5.8   | 1.4   | Het/Cent   |
| 12     | SL2.40sc04057               | 3  | H005D14 | M035N06          | 25.2  | 4.2   | Eu/Het     |
| 12     | SL2.40sc04915               | 4  | M006L17 | H017P17          | 1.6   | 0.3   | Eu         |
| 12     | SL2.40sc05611               | 9  | E031M18 | E024H05          | 1.2   | 0.4   | Eu         |
| 12     | SL2.40sc05380               | 10 | H029L21 | E030J22          | 2.6   | 1.4   | Eu         |
| Total: |                             |    |         |                  | 760.0 | 196.7 |            |

<sup>1</sup> [http://solgenomics.net/cview/map.pl?map\\_id=agg](http://solgenomics.net/cview/map.pl?map_id=agg)

<sup>2</sup> FISH-based scaffolds are color coded with reference to a comparison with their order and orientation determined using the Kazusa EXPEN 2000 linkage map. Scaffold names and numbers that are unchanged by FISH are shown with black lettering on a white background. Changed scaffolds are shown with white lettering on a red background (order only), white lettering on a blue background (orientation only), and white lettering on a purple background (both order and orientation).

<sup>3</sup> Scaffold number is determined by scaffold order from head to tail in the pseudomolecules based on the linkage map.

<sup>4</sup> Left and right refer to the probe orientation when the chromosomes are diagrammed with the telomere of the short arm on the left (= head) and the telomere of the long arm on the right (= tail).

<sup>5</sup> BAC library names have been abbreviated. H=HindIII, E=EcoRI, M=MboI, s=sheared, F=Fosmid

<sup>6</sup> The Tomato Genome Consortium, 2012 The tomato genome sequence provides insights into fleshy fruit evolution. Nature 485: 635-641; <http://solgenomics.net>

<sup>7</sup> Not applicable because only one BAC/fosmid was localized in this small scaffold.

<sup>8</sup> SC length determinations are relatively inaccurate in and near scaffolds 12 and 2.

<sup>9</sup> The actual length of this scaffold is 17.6 Kb so it is rounded to 0.0 Mb.

<sup>10</sup> Scaffold SL2.40sc04757 was ordered and oriented in Heinz 1706 because this scaffold was involved in an inversion around the kinetochore of Cherry Tomato LA4444.

11 Eu = euchromatin; Het = heterochromatin; cent = centromere/kinetochore; Border (transition between euchromatin and heterochromatin); Eu/Het includes euchromatin, heterochromatin, and the border between Eu and Het; Het/Cent includes heterochromatin and centromere; Border/Eu includes euchromatin and border with heterochromatin; Eu/Het/Cent includes euchromatin, the border with heterochromatin, heterochromatin and centromeres.
