# Supplementary material for: Fluorescence In Situ Hybridization and Optical Mapping to Correct Scaffold Arrangement in the Tomato Genome
Source: PubMed Central journal article supplement (PMC4132171; doi:10.1534/g3.114.011197), 2014-05-30
Supplement: supp_g3.114.011197_TableS5.pdf [file supp_g3.114.011197_TableS5.pdf]

**Table S5 Comparison of scaffold order and orientation based on linkage, optical mapping, and FISH**

| Chromosome | Scaffold No. <sup>1</sup> | Scaffold Name <sup>2</sup> | Mb Length | Scaffold Order According to: |                                         |                   |
|------------|---------------------------|----------------------------|-----------|------------------------------|-----------------------------------------|-------------------|
|            |                           |                            |           | Linkage                      | Optical Superscaffold (OS) <sup>3</sup> | FISH <sup>4</sup> |
| 1          | 1                         | SL2.40sc04133              | 33.0      | 1                            |                                         | 1                 |
| 1          | 2                         | SL2.40sc03666              | 1.7       | 2                            |                                         | 3                 |
| 1          | 3                         | SL2.40sc04191              | 2.6       | 3                            | 2                                       | 2*                |
| 1          | 4                         | SL2.40sc03594              | 6.3       | 4                            | 4                                       | 4                 |
| 1          | 5                         | SL2.40sc05010              | 20.5      | 5                            | 5                                       | 5                 |
| 1          | 6                         | SL2.40sc05941              | 6.2       | 6                            | 6                                       | 6                 |
| 1          | 7                         | SL2.40sc06903              | 2.7       | 7                            | 8                                       | 8                 |
| 1          | 8                         | SL2.40sc06917              | 0.4       | 8                            | 7                                       | 7                 |
| 1          | 9                         | SL2.40sc04323              | 17.0      | 9                            |                                         | 9                 |
| 2          | 1                         | SL2.40sc06593              | 1.7       | 1                            | 4                                       | 4*                |
| 2          | 2                         | SL2.40sc04142              | 1.4       | 2                            | 6                                       | 6*                |
| 2          | 3                         | SL2.40sc03766              | 2.1       | 3                            |                                         | 5                 |
| 2          | 4                         | SL2.40sc04732              | 4.0       | 4                            |                                         | 1                 |
| 2          | 5                         | SL2.40sc05776              | 6.5       | 5                            |                                         | 2                 |
| 2          | 6                         | SL2.40sc04208              | 11.7      | 6                            |                                         | 3                 |
| 2          | 7                         | SL2.40sc03665              | 22.4      | 7                            |                                         | 7                 |
| 3          | 1                         | SL2.40sc04439              | 2.5       | 1                            |                                         | 1                 |
| 3          | 2                         | SL2.40sc04822              | 1.3       | 2                            |                                         | 4                 |
| 3          | 3                         | SL2.40sc06911              | 2.6       | 3                            |                                         | 5                 |
| 3          | 4                         | SL2.40sc04696              | 6.5       | 4                            |                                         | 6                 |
| 3          | 5                         | SL2.40sc05330              | 3.1       | 5                            |                                         | 9                 |
| 3          | 6                         | SL2.40sc04126              | 3.0       | 6                            |                                         | 7                 |
| 3          | 7                         | SL2.40sc06725              | 18.6      | 7                            |                                         | 8                 |
| 3          | 8                         | SL2.40sc04704              | 4.1       | 8                            |                                         | 2*                |
| 3          | 9                         | SL2.40sc04616              | 1.1       | 9                            |                                         | 12                |
| 3          | 10                        | SL2.40sc03806              | 5.5       | 10                           |                                         | 10                |
| 3          | 11                        | SL2.40sc03796              | 7.0       | 11                           |                                         | 11                |
| 3          | 12                        | SL2.40sc03721              | 0.4       | 12                           | 3                                       | 3*                |
| 3          | 13                        | SL2.40sc03701              | 9.2       | 13                           | 13                                      | 13                |
| 4          | 1                         | SL2.40sc03604              | 11.6      | 1                            |                                         | 1                 |
| 4          | 2                         | SL2.40sc03683              | 2.0       | 2                            |                                         | 3*                |
| 4          | 3                         | SL2.40sc05339              | 17.6      | 3                            |                                         | 2*                |
| 4          | 4                         | SL2.40sc06101              | 23.3      | 4                            |                                         | 4                 |

|    |    |               |      |    |    |    |
|----|----|---------------|------|----|----|----|
| 4  | 5  | SL2.40sc04680 | 0.8  | 5  |    | 5  |
| 4  | 6  | SL2.40sc04135 | 8.8  | 6  |    | 6  |
| 5  | 1  | SL2.40sc03726 | 42.1 | 1  |    | 1  |
| 5  | 2  | SL2.40sc06155 | 4.3  | 2  |    | 2* |
| 5  | 3  | SL2.40sc03902 | 18.6 | 3  |    | 3  |
| 6  | 1  | SL2.40sc04474 | 8.6  | 1  |    | 1  |
| 6  | 2  | SL2.40sc05383 | 0.7  | 2  |    | 3* |
| 6  | 3  | SL2.40sc06140 | 6.1  | 3  |    | 2  |
| 6  | 4  | SL2.40sc04279 | 9.6  | 4  |    | 4  |
| 6  | 5  | SL2.40sc05188 | 2.4  | 5  | 5  | 5* |
| 6  | 6  | SL2.40sc05732 | 6.6  | 6  | 6  | 6  |
| 6  | 7  | SL2.40sc05054 | 10.3 | 7  | 7  | 7  |
| 6  | 8  | SL2.40sc03622 | 1.8  | 8  | 8  | 8  |
| 7  | 1  | SL2.40sc03731 | 33.3 | 1  | 1  | 1  |
| 7  | 2  | SL2.40sc05397 | 8.0  | 2  | 2  | 2  |
| 7  | 3  | SL2.40sc03685 | 20.7 | 3  |    | 3  |
| 7  | 4  | SL2.40sc04626 | 3.4  | 4  |    | 4  |
| 8  | 1  | SL2.40sc04813 | 3.0  | 1  | 1  | 1  |
| 8  | 2  | SL2.40sc03770 | 6.3  | 2  | 2  | 2  |
| 8  | 3  | SL2.40sc03835 | 0.2  | 3  |    | 7  |
| 8  | 4  | SL2.40sc04701 | 1.5  | 4  | 5  | 5* |
| 8  | 5  | SL2.40sc03749 | 14.6 | 5  | 6  | 6* |
| 8  | 6  | SL2.40sc04236 | 8.4  | 6  | 3  | 3* |
| 8  | 7  | SL2.40sc04167 | 7.0  | 7  | 4  | 4* |
| 8  | 8  | SL2.40sc04948 | 14.4 | 8  |    | 8  |
| 8  | 9  | SL2.40sc03923 | 7.5  | 9  |    | 9  |
| 9  | 1  | SL2.40sc03771 | 19.2 | 1  |    | 1  |
| 9  | 2  | SL2.40sc06916 | 0.0  | 2  | 4  | 4  |
| 9  | 3  | SL2.40sc04950 | 5.2  | 3  | 3  | 3* |
| 9  | 4  | SL2.40sc04008 | 5.8  | 4  | 5  | 5  |
| 9  | 5  | SL2.40sc04785 | 2.0  | 5  | 6  | 6  |
| 9  | 6  | SL2.40sc04777 | 28.2 | 6  |    | 2  |
| 9  | 7  | SL2.40sc05269 | 2.7  | 7  |    | 7  |
| 9  | 8  | SL2.40sc03852 | 1.3  | 8  | 8  | 8  |
| 9  | 9  | SL2.40sc04828 | 2.5  | 9  | 9  | 9  |
| 9  | 10 | SL2.40sc06214 | 0.6  | 10 | 10 | 10 |
| 10 | 1  | SL2.40sc05925 | 5.4  | 1  | 1  | 1  |
| 10 | 2  | SL2.40sc03798 | 16.5 | 2  | 2  | 2  |
| 10 | 3  | SL2.40sc05632 | 3.9  | 3  |    | 4  |

|              |    |               |       |    |    |       |    |
|--------------|----|---------------|-------|----|----|-------|----|
| 10           | 4  | SL2.40sc04872 | 31.1  | 4  |    |       | 3  |
| 10           | 5  | SL2.40sc04534 | 0.1   | 5  |    |       | 5  |
| 10           | 6  | SL2.40sc04199 | 8.0   | 6  |    |       | 6  |
| 11           | 1  | SL2.40sc03748 | 15.2  | 1  |    |       | 1  |
| 11           | 2  | SL2.40sc04054 | 2.5   | 2  |    |       | 4  |
| 11           | 3  | SL2.40sc03752 | 8.0   | 3  |    |       | 2  |
| 11           | 4  | SL2.40sc06763 | 17.4  | 4  |    |       | 3* |
| 11           | 5  | SL2.40sc06137 | 2.1   | 5  | 5  | OS 12 | 5  |
| 11           | 6  | SL2.40sc03876 | 8.2   | 6  | 6  |       | 6  |
| 12           | 1  | SL2.40sc04607 | 16.1  | 1  |    |       | 1  |
| 12           | 2  | SL2.40sc04878 | 1.2   | 2  |    |       | 8  |
| 12           | 3  | SL2.40sc04057 | 4.9   | 3  |    |       | 7* |
| 12           | 4  | SL2.40sc04915 | 5.7   | 4  |    |       | 2  |
| 12           | 5  | SL2.40sc04757 | 1.3   | 5  |    |       | 6  |
| 12           | 6  | SL2.40sc04266 | 5.8   | 6  | 5  | OS 13 | 5  |
| 12           | 7  | SL2.40sc04039 | 25.2  | 7  | 3  |       | 3  |
| 12           | 8  | SL2.40sc06147 | 1.6   | 8  | 4  |       | 4  |
| 12           | 9  | SL2.40sc05611 | 1.2   | 9  | 9  | OS 14 | 9  |
| 12           | 10 | SL2.40sc05380 | 2.6   | 10 | 10 |       | 10 |
| <b>Total</b> |    |               | 760.0 |    |    |       |    |

<sup>1</sup>Scaffolds are numbered according to their order determined using the tomato Kazusa EXPEN 2000 linkage map at

[http://solgenomics.net/cview/map.pl?map\\_version\\_id=103](http://solgenomics.net/cview/map.pl?map_version_id=103)

<sup>2</sup>[http://solgenomics.net/cview/map.pl?map\\_id=agp](http://solgenomics.net/cview/map.pl?map_id=agp)

<sup>3</sup>Optical superscaffolds consist of 2-4 sequenced scaffolds ordered and oriented by optical mapping. Scaffold numbers refer to column 2. Empty spaces indicate scaffolds that were not ordered and oriented by optical mapping. Green scaffolds are in the same order and orientation as that determined by the linkage map. Red scaffolds are in the same orientation but different order, blue scaffolds are in the same order but different orientation, and purple scaffolds are in a different order and orientation than that determined by the linkage map.

<sup>4</sup>Order and orientation of scaffolds determined by FISH. Scaffold numbers refer to column 2. Green scaffolds are in the same order and orientation by both optical mapping and by FISH.

\*Denotes scaffolds with a different orientation by FISH than that determined by the linkage map.
