# Supplementary material for: Fluorescence In Situ Hybridization and Optical Mapping to Correct Scaffold Arrangement in the Tomato Genome
Source: PubMed Central journal article supplement (PMC4132171; doi:10.1534/g3.114.011197), 2014-05-30
Supplement: supp_g3.114.011197_TableS7.pdf [file supp_g3.114.011197_TableS7.pdf]

**Table S7 Gap sizes between scaffolds determined using BAC-FISH**

| Chr. | Gap between Scaffold A and Scaffold B <sup>1</sup> | BAC Probe for Tail of Scaffold A <sup>2</sup> | BAC Probe for Head of Scaffold B <sup>2</sup> | Chromatin Type <sup>3</sup> | DNA Mb per $\mu\text{m}$ | Gap Size SC length ( $\mu\text{m}$ ) | Distance between BACs (Mb) | Corrected Gap Size Mb estimate <sup>4</sup> |
|------|----------------------------------------------------|-----------------------------------------------|-----------------------------------------------|-----------------------------|--------------------------|--------------------------------------|----------------------------|---------------------------------------------|
| 1    | 1-3                                                | M034D03                                       | s053P14                                       | Het                         | 8.8                      | 0.3                                  | 2.6                        | 2.4                                         |
| 1    | 3-2                                                | s083L21                                       | E016I11                                       | Cent                        | 3.3                      | 0.7                                  | 2.2                        | 1.9                                         |
| 1    | 2-4                                                | H033N15                                       | s006A13                                       | Het                         | 8.8                      | 0.1                                  | 0.9                        | 0.6                                         |
| 1    | 4-5                                                | s042B18                                       | s042O02                                       | Het                         | 8.8                      | 0.3                                  | 2.6                        | 2.2                                         |
| 1    | 5-6                                                | H037N04                                       | s040G18                                       | Border                      | 5.1                      | 0.1                                  | 0.5                        | 0.3                                         |
| 1    | 6-8                                                | E021C24                                       | s022L14                                       | Border                      | 5.1                      | 0.1                                  | 0.5                        | 0.3                                         |
| 1    | 8-7                                                | s121I01                                       | s071P10                                       | Eu                          | 1.5                      | 0.3                                  | 0.5                        | 0.2                                         |
| 1    | 7-9                                                | s071P10                                       | s024J19                                       | Eu                          | 1.5                      | 0.3                                  | 0.5                        | 0.2                                         |
| 2    | 4-6                                                | E008B15                                       | s053E24                                       | Het                         | 8.8                      | 0.1                                  | 0.7                        | 0.4                                         |
| 2    | 6-5                                                | s044P10                                       | H011G24                                       | Het                         | 8.8                      | 0.0                                  | 0.2                        | 0.0                                         |
| 2    | 5-1                                                | M036C03                                       | s056I16                                       | Het                         | 8.8                      | 0.0                                  | 0.1                        | 0.0                                         |
| 2    | 1-2                                                | s079J24                                       | s053C07                                       | Het                         | 8.8                      | 0.5                                  | 4.1                        | 3.2                                         |
| 2    | 2-3                                                | s050E09                                       | M021A03                                       | Het                         | 8.8                      | 0.1                                  | 1.0                        | 0.5                                         |
| 2    | 3-7                                                | E034J17                                       | s101F18                                       | Border                      | 5.1                      | 0.4                                  | 1.9                        | 1.4                                         |
| 3    | 1-4                                                | s086D22                                       | s018K15                                       | Eu                          | 1.5                      | 0.2                                  | 0.4                        | 0.1                                         |
| 3    | 4-5                                                | s002G24                                       | s050E05                                       | Eu                          | 1.5                      | 0.1                                  | 0.2                        | 0.0                                         |
| 3    | 5-6                                                | H037B06                                       | H020G20                                       | Border                      | 5.1                      | 0.2                                  | 1.1                        | 0.3                                         |
| 3    | 6-9                                                | H039C15                                       | M079O10                                       | Het/Cent                    | 8.8                      | 0.6                                  | 5.0                        | 4.7                                         |
| 3    | 9-7                                                | M002J15                                       | H244B01                                       | Het                         | 8.8                      | 0.1                                  | 0.6                        | 0.2                                         |
| 3    | 7-8                                                | E121G21                                       | H027L13                                       | Het                         | 8.8                      | 0.1                                  | 1.2                        | 0.8                                         |
| 3    | 8-12                                               | s071G06                                       | E018K21                                       | Het                         | 8.8                      | 0.0                                  | 0.3                        | 0.2 <sup>5</sup>                            |
| 3    | 12-2                                               | H028L03                                       | s042B23                                       | Het                         | 8.8                      | 0.0                                  | 0.3                        | 0.0 <sup>5</sup>                            |
| 3    | 2-10                                               | H030A19                                       | H011C02                                       | Border                      | 5.1                      | 0.2                                  | 0.8                        | 0.6 <sup>5</sup>                            |
| 3    | 10-11                                              | H001H05                                       | M003H09                                       | Eu                          | 1.5                      | 0.2                                  | 0.3                        | 0.0                                         |
| 3    | 11-3                                               | E031G05                                       | M015G06                                       | Eu                          | 1.5                      | 0.4                                  | 0.6                        | 0.1                                         |
| 3    | 3-13                                               | s048H23                                       | E006F17                                       | Eu                          | 1.5                      | 0.3                                  | 0.4                        | 0.1                                         |
| 4    | 1-3                                                | H012B20                                       | E036C15                                       | Het                         | 8.8                      | 0.06                                 | 0.5                        | 0.3                                         |
| 4    | 3-2                                                | H018I03                                       | M036H17                                       | Cent                        | 3.3                      | 0.2                                  | 0.6                        | 0.4                                         |
| 4    | 2-4                                                | M016J15                                       | M038M16                                       | Het                         | 8.8                      | 0.03                                 | 0.2                        | 0.1                                         |
| 4    | 4-5                                                | M029O16                                       | H013P02                                       | Eu                          | 1.5                      | 0.04                                 | 0.1                        | 0.0                                         |
| 4    | 5-6                                                | M018D12                                       | H020C13                                       | Chrom                       | 8.8                      | 0.2                                  | 1.9                        | 1.6                                         |
| 5    | 1-2                                                | H002J04                                       | s031L05                                       | Het                         | 8.8                      | 0.1                                  | 1.1                        | 0.9                                         |
| 5    | 2-3                                                | s084H11                                       | H016D20                                       | Het                         | 8.8                      | 0.1                                  | 1.1                        | 0.8                                         |

|    |      |         |         |        |     |      |     |      |
|----|------|---------|---------|--------|-----|------|-----|------|
| 6  | 1-3  | H028K02 | H025N04 | Het    | 8.8 | 0.3  | 2.8 | 2.4  |
| 6  | 3-2  | M029F23 | E040C12 | Het    | 8.8 | 0.1  | 0.8 | 0.6  |
| 6  | 2-4  | E013C07 | M029C07 | Het    | 8.8 | 0.1  | 0.6 | 0.4  |
| 6  | 4-5  | E009J17 | E033O20 | Border | 5.1 | 0.0  | 0.1 | 0.0  |
| 6  | 5-6  | H031J01 | M034N10 | Border | 5.1 | 0.0  | 0.1 | 0.0  |
| 6  | 6-7  | E023E10 | E018M04 | Eu     | 1.5 | 0.3  | 0.4 | 0.0  |
| 6  | 7-8  | E008B16 | H025F06 | Eu     | 1.5 | 0.2  | 0.3 | 0.0  |
| 7  | 1-2  | M016H01 | H032J14 | Het    | 8.8 | 0.06 | 0.5 | 0.4  |
| 7  | 2-3  | E016C19 | H001O15 | Het    | 8.8 | 0.3  | 2.5 | 2.4  |
| 7  | 3-4  | H024C01 | E032D11 | Eu     | 1.5 | 0.13 | 0.2 | 0.0  |
| 8  | 1-2  | H008J16 | H015E06 | Eu     | 1.5 | 0.3  | 0.4 | 0.0  |
| 8  | 2-7  | H009K19 | M012I24 | Border | 5.1 | 0.2  | 0.8 | 0.5  |
| 8  | 7-5  | M012I24 | s093G06 | Border | 5.1 | 0.1  | 0.6 | 0.3  |
| 8  | 5-6  | s030B23 | s105O13 | Border | 5.1 | 0.04 | 0.2 | 0.0  |
| 8  | 6-3  | M005G10 | s078C24 | Het    | 8.8 | 0.04 | 0.3 | 0.05 |
| 8  | 3-4  | s058J24 | E024O12 | Het    | 8.8 | 0.1  | 1.2 | 1.0  |
| 8  | 4-8  | M019D14 | H033A16 | Het    | 8.8 | 0.2  | 1.4 | 0.8  |
| 8  | 8-9  | M007C12 | s082B11 | Eu     | 1.5 | 0.2  | 0.3 | 0.0  |
| 9  | 1-4  | M025N23 | E015A15 | Het    | 8.8 | 0.2  | 1.7 | 1.5  |
| 9  | 4-3  | E025E12 | E018E08 | Het    | 8.8 | 0.1  | 0.9 | 0.8  |
| 9  | 3-5  | M005G01 | M013P10 | Het    | 8.8 | 0.2  | 1.4 | 1.1  |
| 9  | 5-6  | E022O16 | M018I03 | Het    | 8.8 | 0.2  | 1.4 | 1.3  |
| 9  | 6-2  | H005M15 | F051C04 | Eu     | 1.5 | 0.2  | 0.3 | 0.0  |
| 9  | 2-7  | F051C04 | M019G06 | Eu     | 1.5 | 0.1  | 0.1 | 0.0  |
| 9  | 7-8  | M020M04 | M025N11 | Eu     | 1.5 | 0.4  | 0.5 | 0.0  |
| 9  | 8-9  | H010F04 | H001I06 | Eu     | 1.5 | 0.1  | 0.2 | 0.0  |
| 9  | 9-10 | E024O21 | M037I08 | Eu     | 1.5 | 0.4  | 0.5 | 0.1  |
| 10 | 1-2  | E009D07 | H023E16 | Border | 5.1 | 0.02 | 0.1 | 0.0  |
| 10 | 2-4  | s071N16 | E029F05 | Het    | 8.8 | 0.1  | 0.7 | 0.4  |
| 10 | 4-3  | M011N01 | s042K13 | Het    | 8.8 | 0.02 | 0.2 | 0.0  |
| 10 | 3-5  | s121P17 | F014E24 | Eu     | 1.5 | 0.13 | 0.2 | 0.1  |
| 10 | 5-6  | F014E24 | E036N16 | Eu     | 1.5 | 0.10 | 0.2 | 0.0  |
| 11 | 1-4  | E018D15 | H008F06 | Het    | 8.8 | 0.1  | 0.7 | 0.4  |
| 11 | 4-2  | H004F15 | s082L15 | Het    | 8.8 | 0.1  | 0.9 | 0.6  |
| 11 | 2-3  | H001N12 | E031L09 | Het    | 8.8 | 0.2  | 1.8 | 1.4  |
| 11 | 3-5  | s045H10 | s084O21 | Border | 5.1 | 0.1  | 0.5 | 0.1  |
| 11 | 5-6  | s017L16 | s105E01 | Border | 5.1 | 0.2  | 0.9 | 0.7  |
| 12 | 1-8  | E005K14 | H016B06 | Border | 5.1 | 0.1  | 0.4 | 0.2  |
| 12 | 8-7  | M038L04 | E036O23 | Border | 5.1 | 0.0  | 0.2 | 0.0  |

|    |                  |         |         |        |     |     |               |             |
|----|------------------|---------|---------|--------|-----|-----|---------------|-------------|
| 12 | 7-2              | E003D15 | M008A07 | Border | 5.1 | 0.1 | 0.4           | 0.1         |
| 12 | 2-6              | H003H12 | M023C14 | Het    | 8.8 | 0.1 | 0.7           | 0.6         |
| 12 | 6-5              | E004B02 | M040D19 | Het    | 8.8 | 0.1 | 0.8           | 0.5         |
| 12 | 5-3 <sup>6</sup> | E012H19 | H005D14 | Het    | 8.8 | 0.1 | 1.0           | 0.8         |
| 12 | 3-4              | M035N06 | M006L17 | Eu     | 1.5 | 0.1 | 0.1           | 0.0         |
| 12 | 4-9              | H017P17 | E031M18 | Eu     | 1.5 | 0.6 | 0.9           | 0.1         |
| 12 | 9-10             | E024H05 | H029L21 | Eu     | 1.5 | 0.1 | 0.2           | 0.0         |
|    |                  |         |         |        |     |     | <b>Total:</b> | <b>43.9</b> |

---

<sup>1</sup> Gaps are named by the two flanking scaffolds. Scaffold A is closer to the short arm of the chromosome, and across the gap, scaffold B is closer to the long arm of the chromosome. Scaffold number is based on scaffold order from head to tail of pseudomolecules based on the linkage map, and the number and name of each scaffold is defined in Table S1.

<sup>2</sup> BAC library names have been abbreviated. H=HindIII, E=EcoRI, M=Mbol, s=sheared, F=Fosmid

<sup>3</sup>Eu=Euchromatin, Het=Pericentric Heterochromatin, Cent=Centromere, Chrom=Chromomere (non-pericentric heterochromatin), Border=in transition from euchromatin to heterochromatin. These landmarks are based on chromosome structure in SC spreads.

<sup>4</sup> Corrected gap size estimates are smaller than distance between BACs because BACs were not usually at the absolute end of the scaffold and FISH positions were calculated from the middle of the BAC rather than the end of the BAC. See Materials and Methods for procedure to correct gap size. Negative values have been changed to 0.

<sup>5</sup> Positions of the tail of scaffold 8, both ends of scaffolds 2 and 12, and the head of scaffold 10 are relatively uncertain, so estimates of the sizes of gaps 8-12, 12-2, and 2-10 are relatively uncertain as well.

<sup>6</sup> Tomato variety Heinz 1706 was used for measurements of this gap due to an inversion of the kinetochore compared to Cherry Tomato LA4444.
