# Supplementary material for: Fluorescence In Situ Hybridization and Optical Mapping to Correct Scaffold Arrangement in the Tomato Genome
Source: PubMed Central journal article supplement (PMC4132171; doi:10.1534/g3.114.011197), 2014-05-30
Supplement: supp_g3.114.011197_TableS8.pdf [file supp_g3.114.011197_TableS8.pdf]

**Table S8 Comparison of gap sizes by optical mapping and FISH**

| Adjacent Scaffolds |               | FISH<br>Gap ID | Optical<br>Gap Size<br>(Kb) | FISH<br>Gap Size (Kb) | Difference in<br>Gap Size<br>(FISH minus<br>Optical) Kb <sup>1</sup> | Chromatin<br>Type <sup>3</sup> |
|--------------------|---------------|----------------|-----------------------------|-----------------------|----------------------------------------------------------------------|--------------------------------|
| SL2.40SC05611      | SL2.40SC05380 | Chr. 12: 9-10  | 0                           | 0 <sup>2</sup>        | 0                                                                    | Eu                             |
| SL2.40SC03622      | SL2.40SC05054 | Chr. 6: 7-8    | 1                           | 0 <sup>2</sup>        | -1                                                                   | Eu                             |
| SL2.40SC05732      | SL2.40SC05054 | Chr. 6: 6-7    | -2                          | 0 <sup>2</sup>        | 2                                                                    | Eu                             |
| SL2.40SC03798      | SL2.40SC05925 | Chr. 10: 1-2   | 2                           | 0 <sup>2</sup>        | -2                                                                   | Border                         |
| SL2.40SC05188      | SL2.40SC05732 | Chr. 6: 5-6    | 15                          | 0 <sup>2</sup>        | -15                                                                  | Het                            |
| SL2.40SC04813      | SL2.40SC03770 | Chr. 8: 1-2    | 19                          | 0 <sup>2</sup>        | -19                                                                  | Eu                             |
| SL2.40SC03835      | SL2.40SC04236 | Chr. 8: 6-3    | 23                          | 50                    | 27                                                                   | Het                            |
| SL2.40SC03852      | SL2.40SC04828 | Chr. 9: 8-9    | 46                          | 0 <sup>2</sup>        | -46                                                                  | Eu                             |
| SL2.40SC03701      | SL2.40SC06911 | Chr. 3: 3-13   | 37                          | 100                   | 63                                                                   | Eu                             |
| SL2.40SC04828      | SL2.40SC06214 | Chr. 9: 9-10   | 26                          | 100                   | 74                                                                   | Eu                             |
| SL2.40SC04236      | SL2.40SC03749 | Chr. 8: 5-6    | 76                          | 0 <sup>2</sup>        | -76                                                                  | Het                            |
| SL2.40SC04915      | SL2.40SC05611 | Chr. 12: 4-9   | 16                          | 100                   | 84                                                                   | Eu                             |
| SL2.40SC06917      | SL2.40SC06903 | Chr. 1: 8-7    | 33                          | 200                   | 167                                                                  | Eu                             |
| SL2.40SC05941      | SL2.40SC06917 | Chr. 1: 6-8    | 68                          | 300                   | 232                                                                  | Eu/Border                      |
| SL2.40SC03594      | SL2.40SC03666 | Chr. 1: 2-4    | 347                         | 600                   | 253                                                                  | Het                            |
| SL2.40SC05941      | SL2.40SC05010 | Chr. 1: 5-6    | 7                           | 300                   | 293                                                                  | Border                         |
| SL2.40SC04208      | SL2.40SC04732 | Chr. 2: 4-6    | 65                          | 400                   | 335                                                                  | Het                            |
| SL2.40SC03731      | SL2.40SC05397 | Chr. 7: 1-2    | 48                          | 400                   | 352                                                                  | Het                            |
| SL2.40SC06137      | SL2.40SC03876 | Chr. 11: 5-6   | 41                          | 700                   | 659                                                                  | Eu                             |
| SL2.40SC04950      | SL2.40SC04008 | Chr. 9: 4-3    | 124                         | 800                   | 676                                                                  | Het                            |
| SL2.40SC04757      | SL2.40SC04057 | Chr. 12: 5-3   | 42                          | 800                   | 758                                                                  | Het                            |
| SL2.40SC04701      | SL2.40SC03835 | Chr. 8: 3-4    | 32                          | 1000                  | 968                                                                  | Het                            |
| SL2.40SC04785      | SL2.40SC04950 | Chr. 9: 3-5    | 18                          | 1100                  | 1082                                                                 | Het                            |
| SL2.40SC04785      | SL2.40SC04777 | Chr. 9: 5-6    | 139                         | 1300                  | 1161                                                                 | Het                            |
| <b>Totals:</b>     |               |                | <b>1223</b>                 | <b>8250</b>           | <b>7027</b>                                                          |                                |

<sup>1</sup> The gap sizes are arranged in order of increasing absolute difference in gap size estimates. Gaps in euchromatin tend to be smaller than gaps in heterochromatin.

<sup>2</sup> A value of 0 kb indicates that a gap had a negative value after correcting for the position of FISH signals relative to the end of the scaffold (see Estimating Gap Sizes in Materials and Methods and in Results).

<sup>3</sup> Eu = euchromatin, Het = heterochromatin, Border = transition zone between euchromatin and heterochromatin
