# Supplementary material for: Fluorescence In Situ Hybridization and Optical Mapping to Correct Scaffold Arrangement in the Tomato Genome
Source: PubMed Central journal article supplement (PMC4132171; doi:10.1534/g3.114.011197), 2014-05-30
Supplement: supp_g3.114.011197_TableS9.pdf [file supp_g3.114.011197_TableS9.pdf]

**Table S9 Estimates of tomato genome size (1C DNA amount)**

| Method                                       | Genome Size<br>pg (Mb equivalent) <sup>1</sup> | Reference                       |
|----------------------------------------------|------------------------------------------------|---------------------------------|
| Microspectrophotometry                       | 1.0 ( 965)                                     | (Bennett & Smith 1976)          |
| Microspectrophotometry and flow<br>cytometry | 0.95 ( 917)                                    | (Michaelson <i>et al.</i> 1991) |
| Flow cytometry                               | 0.75 ( 724)                                    | (Galbraith <i>et al.</i> 1983)  |
| Flow cytometry                               | 1.10 (1062)                                    | (Anderson <i>et al.</i> 1985)   |
| Flow cytometry                               | 1.0 ( 965)                                     | (Arumuganathan & Earle 1991)    |
| Flow cytometry                               | 0.98 ( 946)                                    | (Dolezel <i>et al.</i> 1992)    |
| Flow cytometry                               | 0.93 ( 897)                                    | (Valkonen 1994)                 |
| Flow cytometry                               | 1.00 ( 965)                                    | (Obermayer <i>et al.</i> 2002)  |
| Cot curve                                    | 0.86 ( 830)                                    | (Peterson <i>et al.</i> 1998)   |
| <b>Average</b>                               | <b>0.95 ( 919)</b>                             |                                 |

<sup>1</sup> Picograms were converted to megabase pairs (Mb) by multiplying the number of picograms (pg) times 965 Mb (Bennett & Smith 1976).

Anderson, L. K., S. M. Stack, M. H. Fox, and C. Zhang, 1985 The relationship between genome size and synaptonemal complex length in higher plants. *Exp. Cell Res.* **156**: 367-378.

Arumuganathan, K., and E. D. Earle, 1991 Nuclear DNA content of some important plant species. *Plant Mol. Biol. Repr.* **9**: 208-218.

Bennett, M. D., and J. B. Smith, 1976 Nuclear DNA amounts in angiosperms. *Phil. Trans. Roy. Soc. Lond. B* **274**: 227-274.

Dolezel, J., S. Sgorbati, and S. Lucretti, 1992 Comparison of three DNA fluorochromes for flow cytometric estimation of nuclear DNA content in plants. *Physiol. Plant.* **85**: 625-631.

Galbraith, D. W., K. R. Harkins, J. M. Maddox, N. M. Ayers, D. P. Sharma *et al.* 1983 Rapid flow cytometric analysis of the cell cycle in intact plant tissues. *Science* **220**: 1049-1051.

Michaelson, M. J., H. J. Price, J. R. Ellison, and J. S. Johnston, 1991 Comparison of plant DNA contents determined by Feulgen microspectrophotometry and laser flow cytometry. *Am. J. Bot.* **78**: 183-188.

Obermayer, R., I. J. Leitch, L. Hanson, and M. D. Bennett, 2002 Nuclear DNA C-values in 30 species double the familial representation in pteridophytes. *Ann. Bot.* **90**: 209-217.

Peterson, D. G., W. R. Pearson, and S. M. Stack, 1998 Characterization of the tomato (*Lycopersicon esculentum*) genome using in vitro and in situ DNA reassociation. *Genome* **41**: 346-356.

Valkonen, J. P. T., 1994 Nuclear DNA content of the Solanum spp. in the series Etuberosa as determined by laser flow cytometry. *Annals of Applied Botany* **125**: 589-600.
