# Supplementary material for: Fluorescence In Situ Hybridization and Optical Mapping to Correct Scaffold Arrangement in the Tomato Genome
Source: PubMed Central journal article supplement (PMC4132171; doi:10.1534/g3.114.011197), 2014-05-30
Supplement: supp_g3.114.011197_TableS10.pdf [file supp_g3.114.011197_TableS10.pdf]

**Table S10 Location of unassigned (chromosome 0) BACs by FISH**

| Library  | BAC ID | Chromosome | Arm | % from KC | Gap ID <sup>1</sup> | Flanking Scaffold | Flanking Scaffold |
|----------|--------|------------|-----|-----------|---------------------|-------------------|-------------------|
| Mbo I    | 014K08 | 1          | S   | 0.6%      | 3-2                 | SL2.40sc04191     | SL2.40sc03666     |
| Mbo I    | 056H03 | 2          | S   | 8.3%      | 1-2                 | SL2.40sc06593     | SL2.40sc04142     |
| Mbo I    | 063O23 | 2          | S   | 8.1%      | 1-2                 | SL2.40sc06593     | SL2.40sc04142     |
| Mbo I    | 016G20 | 2          | S   | 7.7%      | 1-2                 | SL2.40sc06593     | SL2.40sc04142     |
| Mbo I    | 025G13 | 2          | S   | 7.7%      | 1-2                 | SL2.40sc06593     | SL2.40sc04142     |
| Hind III | 078N01 | 2          | S   | 7.3%      | 1-2                 | SL2.40sc06593     | SL2.40sc04142     |
| EcoR I   | 040P16 | 2          | S   | 6.8%      | 1-2                 | SL2.40sc06593     | SL2.40sc04142     |
| Hind III | 009K14 | 2          | S   | 6.7%      | 1-2                 | SL2.40sc06593     | SL2.40sc04142     |
| EcoR I   | 024C17 | 2          | S   | 6.6%      | 1-2                 | SL2.40sc06593     | SL2.40sc04142     |
| Mbo I    | 034C01 | 2          | S   | 6.2%      | 1-2                 | SL2.40sc06593     | SL2.40sc04142     |
| Mbo I    | 050I21 | 2          | S   | 6.0%      | 1-2                 | SL2.40sc06593     | SL2.40sc04142     |
| EcoR I   | 031O09 | 2          | S   | 5.9%      | 1-2                 | SL2.40sc06593     | SL2.40sc04142     |
| Mbo I    | 004J02 | 2          | S   | 5.9%      | 1-2                 | SL2.40sc06593     | SL2.40sc04142     |
| Mbo I    | 034J07 | 2          | S   | 5.9%      | 1-2                 | SL2.40sc06593     | SL2.40sc04142     |
| Hind III | 058D23 | 2          | S   | 5.7%      | 1-2                 | SL2.40sc06593     | SL2.40sc04142     |
| Hind III | 043D06 | 2          | S   | 5.6%      | 1-2                 | SL2.40sc06593     | SL2.40sc04142     |
| Hind III | 012G12 | 2          | S   | 5.3%      | 1-2                 | SL2.40sc06593     | SL2.40sc04142     |
| Hind III | 060L16 | 2          | S   | 5.3%      | 1-2                 | SL2.40sc06593     | SL2.40sc04142     |
| Mbo I    | 010K24 | 2          | L   | 16.9%     | 3-7                 | SL2.40sc03766     | SL2.40sc03665     |
| EcoR I   | 032D02 | 2          | L   | 17.0%     | 3-7                 | SL2.40sc03766     | SL2.40sc03665     |
| Mbo I    | 050I17 | 2          | L   | 17.3%     | 3-7                 | SL2.40sc03766     | SL2.40sc03665     |
| EcoR I   | 002O15 | 2          | L   | 17.3%     | 3-7                 | SL2.40sc03766     | SL2.40sc03665     |
| Hind III | 060D16 | 2          | L   | 17.4%     | 3-7                 | SL2.40sc03766     | SL2.40sc03665     |
| Mbo I    | 029F22 | 2          | L   | 17.5%     | 3-7                 | SL2.40sc03766     | SL2.40sc03665     |
| Hind III | 059K12 | 2          | L   | 17.9%     | 3-7                 | SL2.40sc03766     | SL2.40sc03665     |
| Hind III | 026M09 | 2          | L   | 17.9%     | 3-7                 | SL2.40sc03766     | SL2.40sc03665     |
| EcoR I   | 042F18 | 2          | L   | 18.1%     | 3-7                 | SL2.40sc03766     | SL2.40sc03665     |
| EcoR I   | 006L04 | 2          | L   | 18.1%     | 3-7                 | SL2.40sc03766     | SL2.40sc03665     |
| Hind III | 027N03 | 2          | L   | 18.2%     | 3-7                 | SL2.40sc03766     | SL2.40sc03665     |
| EcoR I   | 007J10 | 2          | L   | 18.3%     | 3-7                 | SL2.40sc03766     | SL2.40sc03665     |
| EcoR I   | 039I06 | 2          | L   | 18.8%     | 3-7                 | SL2.40sc03766     | SL2.40sc03665     |
| Hind III | 067G24 | 2          | L   | 18.9%     | 3-7                 | SL2.40sc03766     | SL2.40sc03665     |
| EcoR I   | 027P01 | 4          | L   | 0.3%      | 3-2                 | SL2.40sc05339     | SL2.40sc03683     |
| EcoR I   | 056L08 | 6          | S   | 32.6%     | 1-3                 | SL2.40sc04474     | SL2.40sc06140     |
| EcoR I   | 047D19 | 6          | S   | 31.7%     | 1-3                 | SL2.40sc04474     | SL2.40sc06140     |

|          |        |    |   |       |                  |                  |                  |
|----------|--------|----|---|-------|------------------|------------------|------------------|
| EcoR I   | 005K11 | 6  | S | 30.9% | 1-3              | SL2.40sc04474    | SL2.40sc06140    |
| EcoR I   | 031A01 | 6  | S | 30.8% | 1-3              | SL2.40sc04474    | SL2.40sc06140    |
| EcoR I   | 035D19 | 6  | S | 30.5% | 1-3              | SL2.40sc04474    | SL2.40sc06140    |
| Mbo I    | 049I18 | 6  | S | 29.8% | 1-3              | SL2.40sc04474    | SL2.40sc06140    |
| Hind III | 029E01 | 6  | S | 29.6% | 1-3              | SL2.40sc04474    | SL2.40sc06140    |
| Hind III | 027D17 | 6  | S | 28.9% | 1-3              | SL2.40sc04474    | SL2.40sc06140    |
| Hind III | 078K13 | 6  | S | 28.7% | 1-3              | SL2.40sc04474    | SL2.40sc06140    |
| Hind III | 002P09 | 6  | S | 28.6% | 1-3              | SL2.40sc04474    | SL2.40sc06140    |
| Mbo I    | 016K18 | 6  | S | 28.1% | 1-3              | SL2.40sc04474    | SL2.40sc06140    |
| EcoR I   | 021L01 | 6  | S | 27.6% | 1-3              | SL2.40sc04474    | SL2.40sc06140    |
| Hind III | 001E08 | 6  | S | 27.3% | 1-3              | SL2.40sc04474    | SL2.40sc06140    |
| EcoR I   | 013G12 | 6  | S | 25.8% | 1-3              | SL2.40sc04474    | SL2.40sc06140    |
| EcoR I   | 025E06 | 7  | S | 57.1% | n/a <sup>2</sup> | n/a <sup>2</sup> | n/a <sup>2</sup> |
| Hind III | 003K20 | 7  | L | 13.6% | n/a <sup>2</sup> | n/a <sup>2</sup> | n/a <sup>2</sup> |
| Hind III | 027F11 | 7  | L | 19.3% | 2-3              | SL2.40sc05397    | SL2.40sc03685    |
| EcoR I   | 021M11 | 7  | L | 19.5% | 2-3              | SL2.40sc05397    | SL2.40sc03685    |
| EcoR I   | 041L20 | 7  | L | 19.9% | 2-3              | SL2.40sc05397    | SL2.40sc03685    |
| EcoR I   | 041L23 | 7  | L | 19.9% | 2-3              | SL2.40sc05397    | SL2.40sc03685    |
| Hind III | 042K23 | 7  | L | 20.5% | 2-3              | SL2.40sc05397    | SL2.40sc03685    |
| Hind III | 036D05 | 7  | L | 21.1% | 2-3              | SL2.40sc05397    | SL2.40sc03685    |
| Hind III | 025A06 | 7  | L | 21.3% | 2-3              | SL2.40sc05397    | SL2.40sc03685    |
| Mbo I    | 017I04 | 7  | L | 21.5% | 2-3              | SL2.40sc05397    | SL2.40sc03685    |
| Mbo I    | 017P20 | 7  | L | 21.5% | 2-3              | SL2.40sc05397    | SL2.40sc03685    |
| Hind III | 012C17 | 7  | L | 23.1% | 2-3              | SL2.40sc05397    | SL2.40sc03685    |
| EcoR I   | 002D11 | 8  | S | 36.5% | 7-5              | SL2.40sc04167    | SL2.40sc03749    |
| Hind III | 041G04 | 8  | S | 35.7% | 7-5              | SL2.40sc04167    | SL2.40sc03749    |
| Mbo I    | 041D13 | 8  | S | 34.9% | 7-5              | SL2.40sc04167    | SL2.40sc03749    |
| EcoR I   | 008F12 | 8  | L | 3.1%  | n/a <sup>2</sup> | n/a <sup>2</sup> | n/a <sup>2</sup> |
| Mbo I    | 056H18 | 9  | S | 9.4%  | 1-4              | SL2.40sc03771    | SL2.40sc04008    |
| Hind III | 072H18 | 9  | S | 6.6%  | 1-4              | SL2.40sc03771    | SL2.40sc04008    |
| Mbo I    | 045G03 | 9  | S | 3.4%  | 1-4              | SL2.40sc03771    | SL2.40sc04008    |
| EcoR I   | 052D12 | 9  | S | 3.4%  | 1-4              | SL2.40sc03771    | SL2.40sc04008    |
| Mbo I    | 042F10 | 9  | L | 99.6% | 10-T             | SL2.40sc06214    | telomere         |
| EcoR I   | 045G19 | 11 | L | 8.0%  | n/a <sup>2</sup> | n/a <sup>2</sup> | n/a <sup>2</sup> |
| Mbo I    | 047F15 | 11 | L | 14.3% | 2-3              | SL2.40sc04054    | SL2.40sc03752    |
| Hind III | 062E02 | 11 | L | 15.2% | 2-3              | SL2.40sc04054    | SL2.40sc03752    |
| Mbo I    | 050G12 | 12 | S | 36.9% | 1-8              | SL2.40sc04607    | SL2.40sc06147    |
| EcoR I   | 010P04 | 12 | S | 35.8% | 8-7              | SL2.40sc06147    | SL2.40sc04039    |
| Hind III | 006G23 | 12 | L | 23.6% | n/a <sup>2</sup> | n/a <sup>2</sup> | n/a <sup>2</sup> |

|        |        |    |   |       |      |               |               |
|--------|--------|----|---|-------|------|---------------|---------------|
| EcoR I | 045D23 | 12 | L | 81.0% | 9-10 | SL2.40sc05611 | SL2.40sc05380 |
|--------|--------|----|---|-------|------|---------------|---------------|

---

<sup>1</sup>Gap ID refers to the gap name given in the FISH Scaffold/Gap diagrams and is derived from the linkage map-based order of the scaffolds.

<sup>2</sup> BAC is not within a gap
